# Supplementary material for: Enhanced Optical Properties of Azaborole Helicenes by Lateral and Helical Extension
Source: PubMed Central journal article supplement (PMC9826013; doi:10.1002/chem.202202280), 2022-09-02
Supplement: CHEM-28-0-s001.pdf [file CHEM-28-0-s001.pdf]

# Chemistry–A European Journal

Supporting Information

## **Enhanced Optical Properties of Azaborole Helicenes by Lateral and Helical Extension**

Felix Full, Quentin Wölflick, Krzysztof Radacki, Holger Braunschweig, and Agnieszka Nowak-Król\*

---

## Table of Contents

|                                                                      |      |
|----------------------------------------------------------------------|------|
| 1. Materials and Methods .....                                       | S1   |
| 2. Synthesis and characterization of $\pi$ -extended helicenes ..... | S2   |
| 3. NMR and MS spectra .....                                          | S4   |
| 4. Single crystal X-ray analysis .....                               | S27  |
| 5. Optical and electrochemical properties .....                      | S32  |
| 6. Resolution of enantiomers .....                                   | S33  |
| 7. Interconversion Barrier .....                                     | S34  |
| 8. Chiroptical properties .....                                      | S36  |
| 9. Computations .....                                                | S37  |
| 10. References .....                                                 | S128 |

## 1. Materials and Methods

**Synthesis:** All reagents were purchased from commercial sources and used as received without further purification, unless otherwise stated. Reagent grade solvents were distilled prior to use. Column chromatography was performed on silica (silica gel, 230–400 mesh).

**NMR Spectroscopy:**  $^1\text{H}$ -,  $^{11}\text{B}$ -,  $^{13}\text{C}$ - and  $^{19}\text{F}$ -NMR spectra were recorded on a Bruker Avance 400 or an Avance III HD 400 spectrometers and were calibrated to the residual solvent signals.  $J$  values are given in Hz. The following abbreviations were used to designate multiplicities: s = singlet, d = doublet, t = triplet, dd = doublet of doublets, ddd = doublet of doublet of doublets, dm = doublet of multiplets, dt = doublet of triplets, td = triplet of doublets, m = multiplet, br s = broad singlet.

**Mass Spectrometry:** High-resolution mass spectra were obtained by electrospray ionization (ESI) or atmospheric- pressure chemical ionization (APCI). ESI and APCI spectra were recorded on an ESI micrOTOF Focus spectrometer from Bruker Daltonics.

**UV/Vis Spectroscopy in Solution:** UV/Vis spectra were recorded on a Jasco V-770 UV/Vis spectrometer. All spectroscopy measurements were conducted with spectroscopic grade solvents from ACROS Organics. Conventional quartz cells (light path 1 cm) were used.

**Fluorescence Spectroscopy in Solution:** Emission spectra were recorded using a FLS 980 fluorescence spectrometer from Edinburgh Instruments equipped with a double monochromator for emission and excitation. The spectra were corrected against photomultiplier and lamp intensity. The fluorescence quantum yields were determined by the optical dilution method ( $\text{OD} \leq 0.05$ )<sup>[S1]</sup> as the average value of six different excitation wavelengths with perylene ( $\Phi_{\text{fl}} = 0.94$  in cyclohexane)<sup>[S2]</sup> as a standard.

**Fluorescence Spectroscopy in the Solid State:** Absolute fluorescence quantum yields of powders were determined on a Hamamatsu Absolute PL Quantum Yield Measurement System CC9920-02. The system is composed of a 150 W CW Xenon lamp as the excitation source, a monochromator (250–700 nm, full width at half-maximum (FWHM) 10 nm), an integrating sphere, and a multichannel spectrometer capable of simultaneously measuring multiple wavelengths between 300 and 950 nm.

**Circular Dichroism (CD) and Circularly Polarized Luminescence (CPL) Spectroscopy:** CD and CPL spectra were recorded on a customized Jasco CPL-300/J-1500 hybrid spectrometer.

**Electrochemistry:** Cyclic voltammetry (CV) and differential pulse voltammetry (DPV) measurements were performed on a standard, commercial electrochemical analyzer (EC epsilon; BAS Instruments, UK) in a three electrode single compartment cell under an argon atmosphere. The supporting electrolyte  $\text{NBu}_4\text{PF}_6$  was synthesized according to the literature,<sup>[S3]</sup> recrystallized from ethanol/water, and dried in a high vacuum. The measurements were carried out in  $\text{CH}_2\text{Cl}_2/0.1 \text{ M NBu}_4\text{PF}_6$  under the exclusion of air and moisture at a concentration of  $c \sim 2.5\text{--}2.8 \times 10^{-4} \text{ M}$  with the ferrocenium/ferrocene redox couple as an internal standard for the calibration of the potential. Working electrode: glassy carbon ( $\varnothing$  1 mm); reference electrode: Ag/AgCl; auxiliary electrode: Pt wire. The internal resistance was compensated by 50%.

## 2. Synthesis and characterization of $\pi$ -extended helicenes

The synthesis of **BIQ-Cl** and **DBzC-Bpin** are shown in Scheme S1.

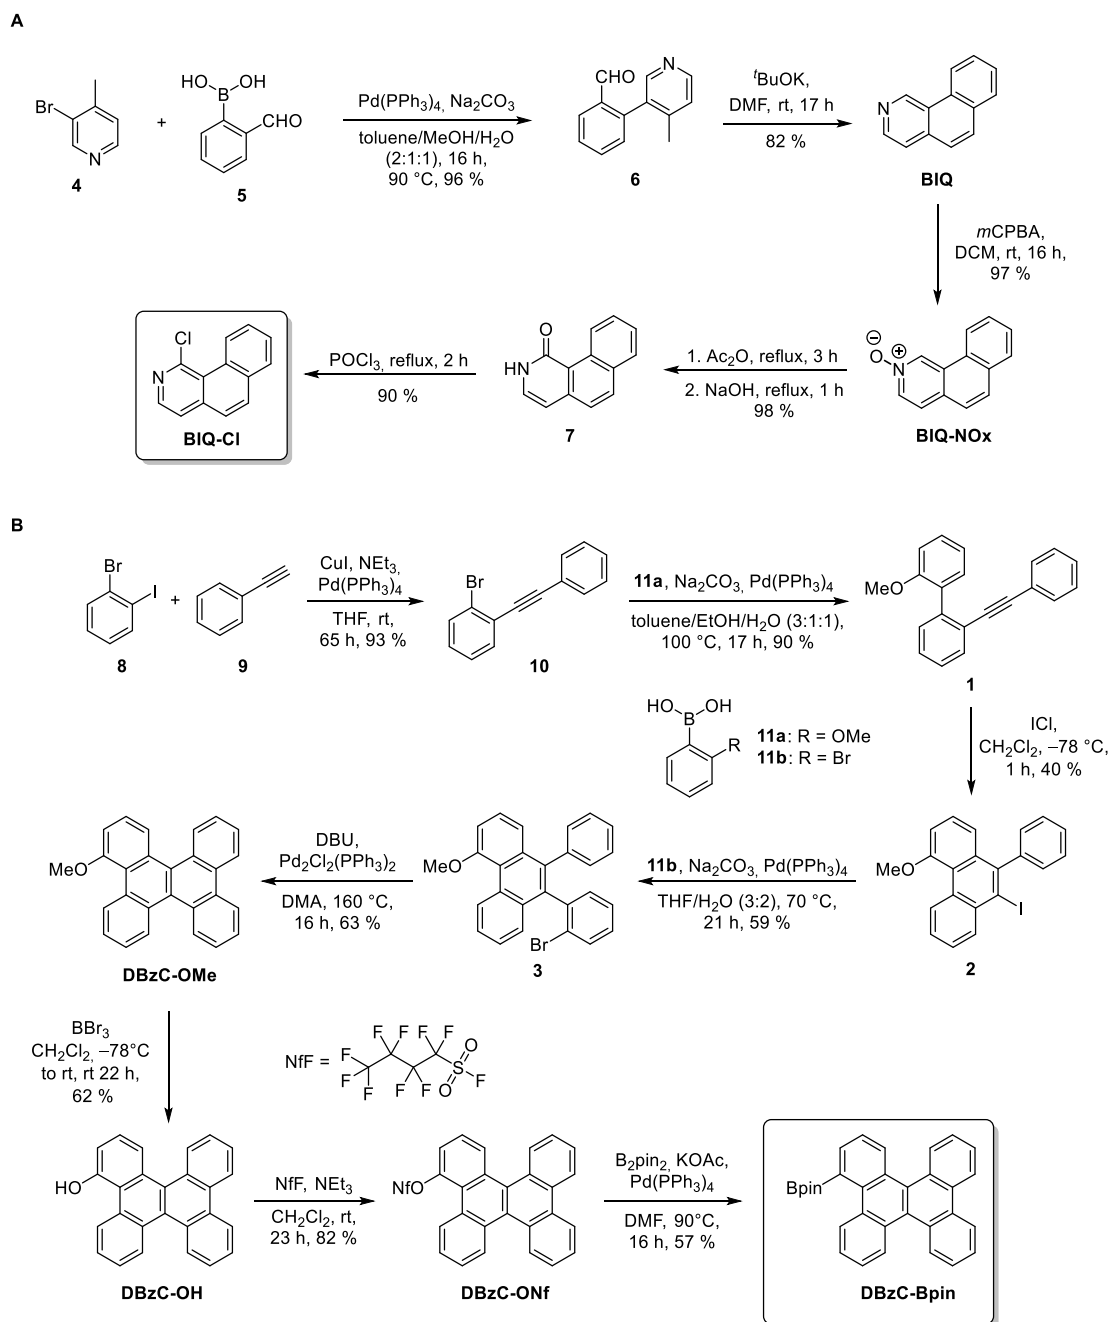

The synthesis of building block **BIQ-Cl** (Scheme S1) was performed according to the reported procedures.<sup>[S4]</sup> The modified procedures are listed below.

#### Synthesis of benzo[*h*]isoquinoline 2-oxide (**BIQ-NOx**).

3-Chloroperbenzoic acid (5.97 g, 34.6 mmol, 2.0 eq.) was given to a solution of **BIQ** (3.10 g, 17.3 mmol, 1.0 eq.) in CH<sub>2</sub>Cl<sub>2</sub> (40 mL) and the mixture was stirred at rt for 16 h. Subsequently, MeOH (10 mL) was added to the mixture to dissolve the precipitated solid. Afterwards, saturated aqueous NaHCO<sub>3</sub> solution (40 mL) was added and the aqueous phase was extracted with CH<sub>2</sub>Cl<sub>2</sub> (4 × 30 mL). All the organic extracts were dried over Na<sub>2</sub>SO<sub>4</sub>, the desiccant was filtered off and the solvent was removed *in vacuo*. Subsequently, the residue was purified by column chromatography (SiO<sub>2</sub>, EtOAc/MeOH 9:1) yielding **BIQ-NOx** (3.29 g, 16.9 mmol, 97 %) as a beige solid. <sup>1</sup>H-NMR (400 MHz, CDCl<sub>3</sub>) δ = 9.51 (s, 1H, Ar-H), 8.46-8.40 (m, 1H, Ar-H), 8.31 (dd, *J* = 6.9, 1.7 Hz, 1H, Ar-H), 7.94-7.91 (m, 1H, Ar-H), 7.85 (d, *J* = 8.8, 1H, Ar-H), 7.76-7.69 (m, 3H, Ar-H), 7.64 (d, *J* = 8.8 Hz, 1H, Ar-H) ppm. Analytical data are in accordance with the literature.<sup>[S4]</sup>

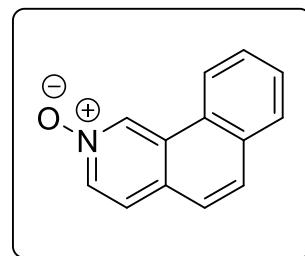

#### Synthesis of 1-chlorobenzo[*h*]isoquinoline (**BIQ-Cl**).

**7** (2.00 g, 10.2 mmol, 1.0 eq.) was dissolved in POCl<sub>3</sub> (40.0 mL, 64.4 g, 420 mmol, 41.0 eq.) and stirred under reflux for 2 h under nitrogen atmosphere. It was cooled to 0°C and H<sub>2</sub>O (200 mL) was added. Subsequently, it was stirred for 1 h at rt and then 2 M NaOH was added until pH reached 7. Afterwards, it was extracted with EtOAc (5 × 200 mL). All the organic extracts were dried over MgSO<sub>4</sub>, the desiccant was filtered off and the solvent was removed *in vacuo*. The crude product was then purified by column chromatography (SiO<sub>2</sub>, Hex/EtOAc, 7:3, 1 % NEt<sub>3</sub>) yielding **BIQ-Cl** (1.97 g, 9.22 mmol, 90 %) as a yellow solid. <sup>1</sup>H-NMR (400 MHz, CDCl<sub>3</sub>) δ = 9.93-9.879 (dm, *J* = 8.4 Hz, 1H, Ar-H), 8.45 (d, *J* = 5.1 Hz, 1H, Ar-H), 7.99-7.95 (m, 2H, Ar-H), 7.79-7.68 (m, 4H, Ar-H) ppm. Analytical data are in accordance with the literature.<sup>[S4]</sup>

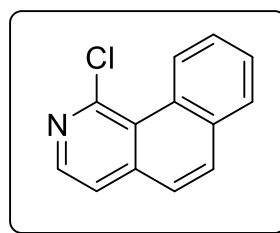

#### Synthesis of 1-bromo-2-(phenylethynyl)benzene (**10**).

CuI (113 mg, 594 μmol, 0.06 eq.) and Pd(PPh<sub>3</sub>)<sub>4</sub> (343 mg, 297 μmol, 0.03 eq.) were added to a Schlenk flask and it was evacuated and purged with nitrogen three times. Afterwards, NEt<sub>3</sub> (4.18 mL, 3.03 g, 30.0 mmol, 3.0 eq.) and THF (10 mL) were added to the flask and it was stirred at rt for 5 min. Subsequently, 1-bromo-2-iodobenzene (1.27 mL, 2.80 g, 9.90 mmol, 1.0 eq.), phenylacetylene (1.15 mL, 1.07 g, 10.5 mmol, 1.1 eq.) and THF (5 mL) were added successively to the mixture and it was stirred at rt for 65 h. The mixture was filtered through a short pad of celite, the remaining solid was washed with Et<sub>2</sub>O (100 mL) and the solvent was removed *in vacuo*. Subsequently, the crude product was purified by column filtration (SiO<sub>2</sub>, Hex) to yield **10** (2.36 g, 9.18 mmol, 93 %) as a colorless oil. <sup>1</sup>H-NMR (400 MHz, CDCl<sub>3</sub>) δ = 7.64-7.51 (m, 4H, Ar-H), 7.40-7.33 (m, 3H, Ar-H), 7.3 (ddd, *J* = 8.2, 7.5, 1.2 Hz, 1H, Ar-H), 7.21-7.15 (ddd, *J* = 8.4, 7.6, 1.6 Hz, 1H, Ar-H) ppm. Analytical data are in accordance with the literature.<sup>[S5]</sup>

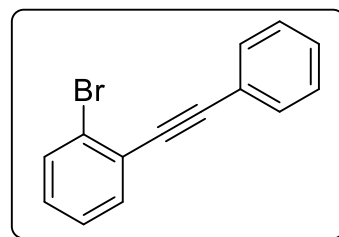

#### Synthesis of 2-methoxy-2'-(phenylethynyl)-1,1'-biphenyl (**1**).

**10** (2.00 g, 7.78 mmol, 1.0 eq.) was dissolved in a mixture of toluene/EtOH/H<sub>2</sub>O (50 mL, 3:1:1). Na<sub>2</sub>CO<sub>3</sub> (3.30 g, 31.1 mmol, 4.0 eq.) was added and the mixture was degassed (argon bubbling). Afterwards, 2-(methoxyphenyl)boronic acid (**11a**; 1.54 g, 10.1 mmol, 1.3 eq.) and Pd(PPh<sub>3</sub>)<sub>4</sub> (629 mg, 544 μmol, 0.07 eq.) were added under nitrogen atmosphere and the reaction mixture was heated to 100 °C and stirred for 17 h. The reaction mixture was cooled to rt, H<sub>2</sub>O (50 mL) was added and it was extracted with EtOAc (4 × 100 mL). The combined organic phases were dried over MgSO<sub>4</sub>, filtered and concentrated *in vacuo*. Subsequently, the crude product was purified by column chromatography (SiO<sub>2</sub>, Hex/EtOAc 95:5) to yield **1** (2.00 g, 7.03 mmol, 90 %) as an orange solid. <sup>1</sup>H-NMR (400 MHz, CDCl<sub>3</sub>) δ = 7.64-7.60 (m, 1H, Ar-H), 7.41-7.30 (m, 5H, Ar-H), 7.26-7.18 (m, 5H, Ar-H), 7.05 (ddd, *J* = 8.2, 7.4, 1.1 Hz, 1H, Ar-H), 7.03-6.99 (m, 1H, Ar-H), 3.78 (s, 3H, OCH<sub>3</sub>) ppm. Analytical data are in accordance with the literature.<sup>[S6]</sup>

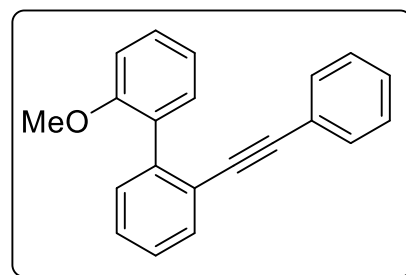

### 3. NMR and MS spectra

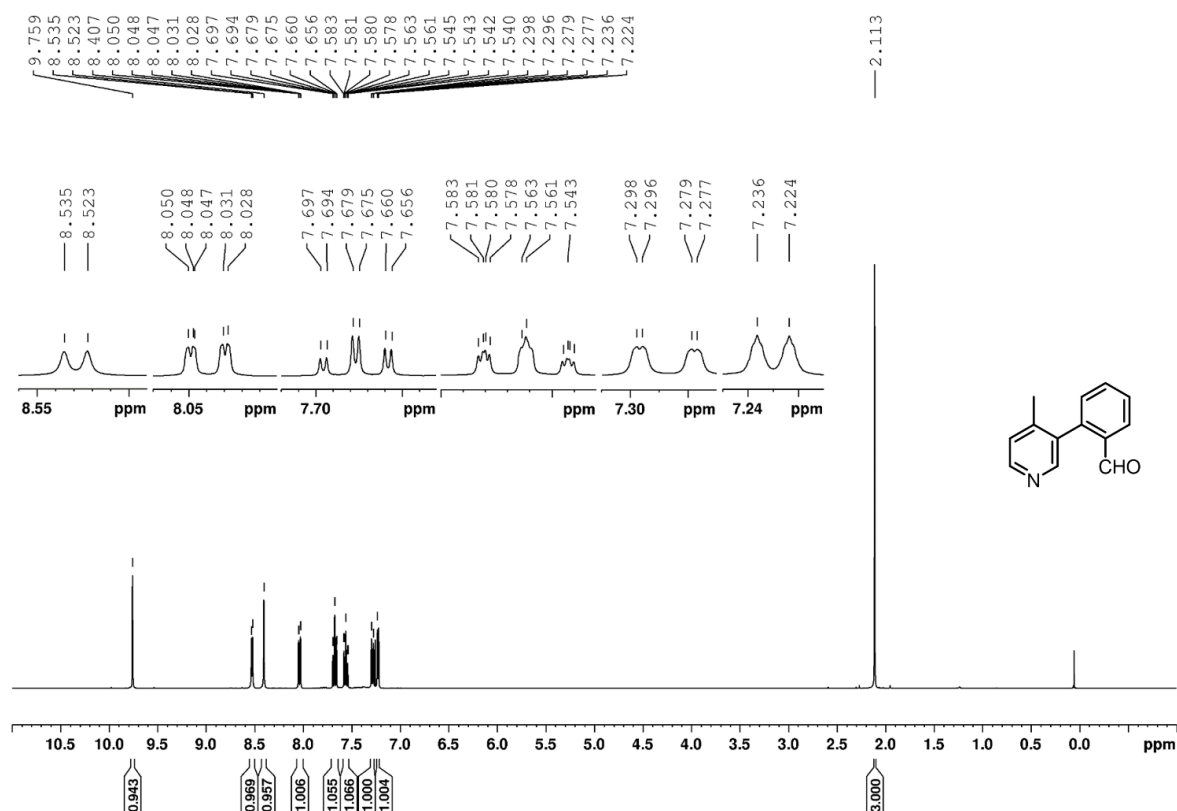

Figure S1. <sup>1</sup>H-NMR of compound 6 (400 MHz, CDCl<sub>3</sub>, 25 °C).

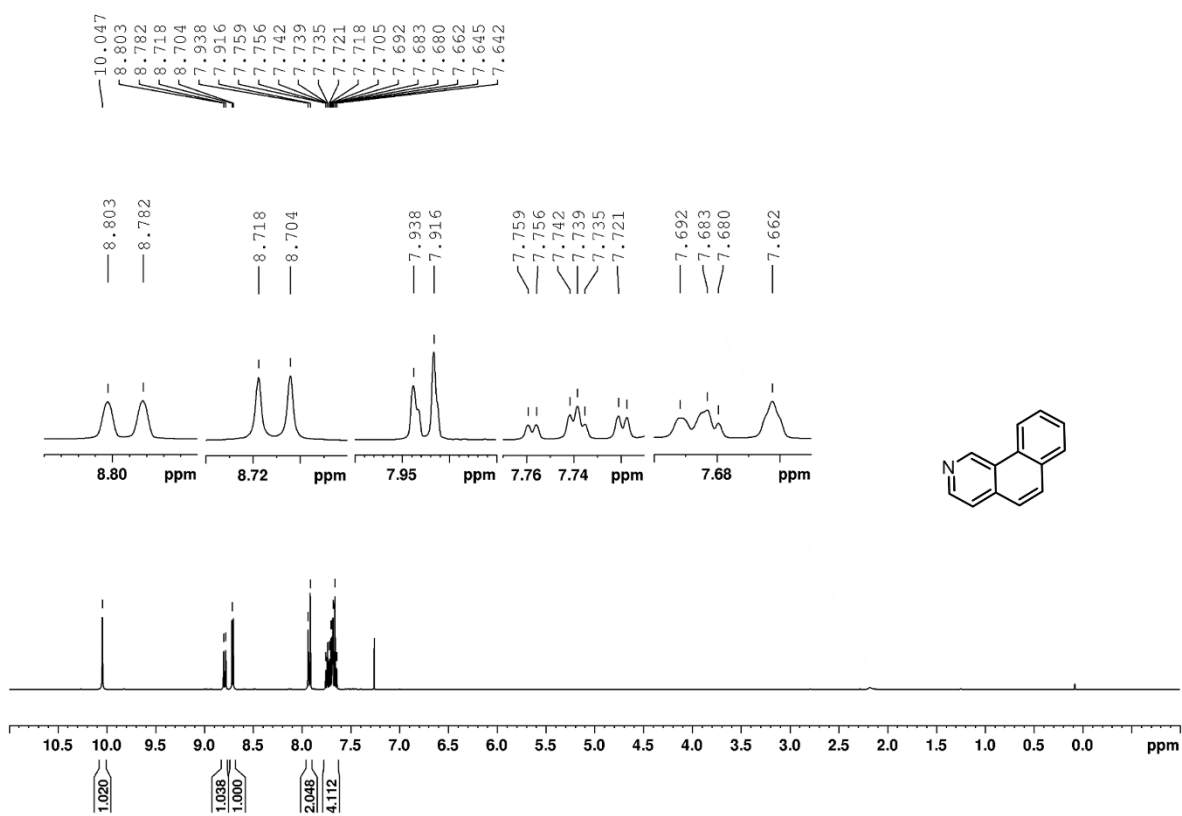

Figure S2. <sup>1</sup>H-NMR of compound BIQ (400 MHz, CDCl<sub>3</sub>, 25 °C).

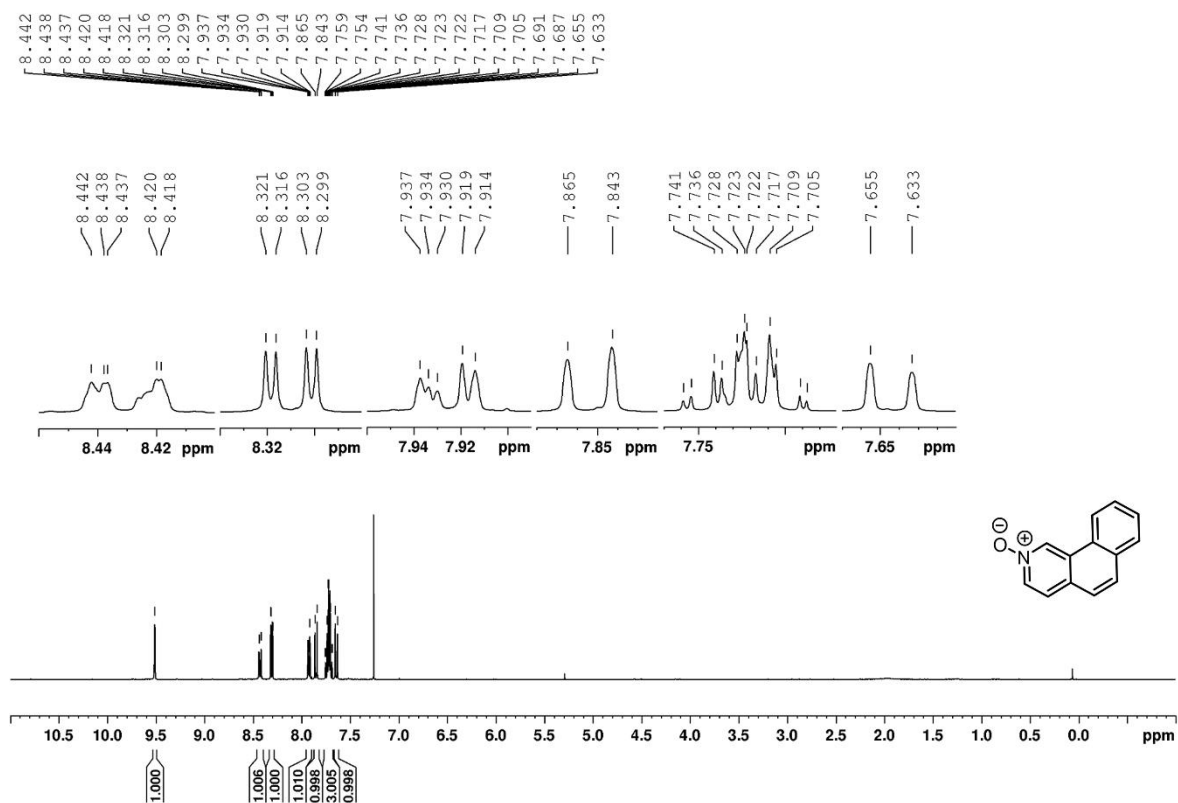

Figure S3.  $^1\text{H-NMR}$  of compound BIQ-NOx (400 MHz,  $\text{CDCl}_3$ , 25  $^\circ\text{C}$ ).

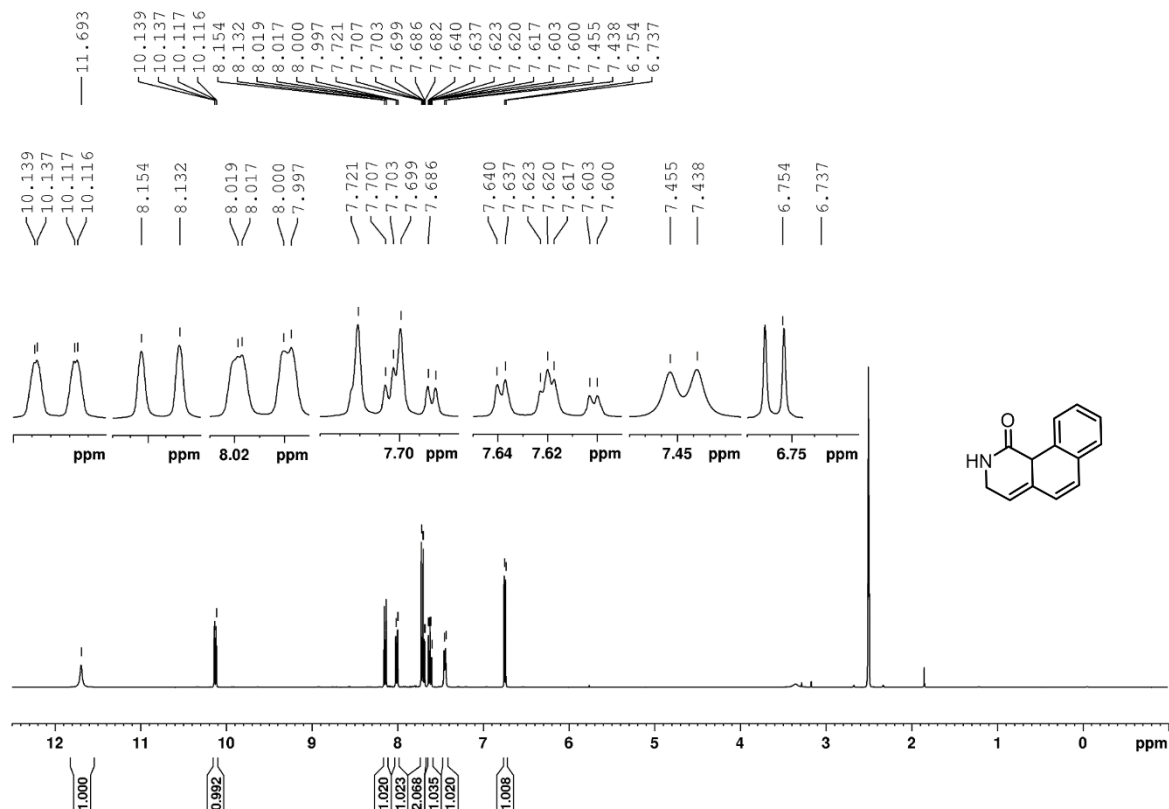

Figure S4.  $^1\text{H-NMR}$  of compound 7 (400 MHz,  $\text{DMSO-}d_6$ , 25  $^\circ\text{C}$ ).

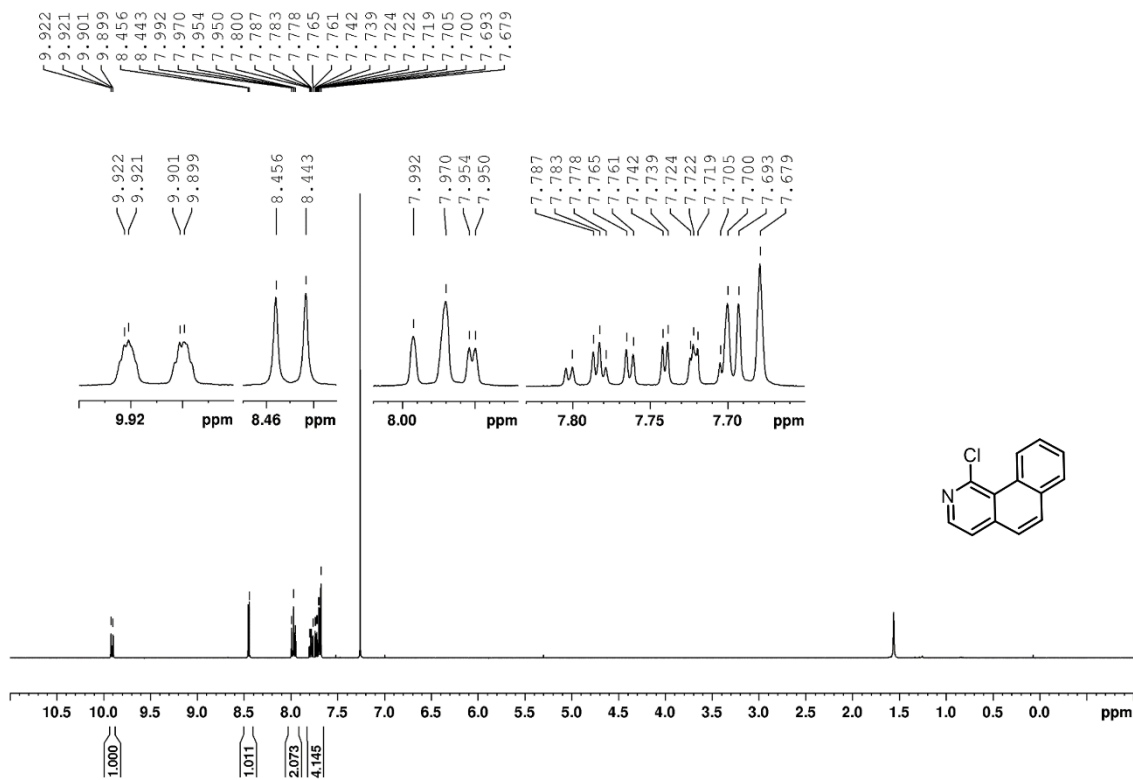

Figure S5.  $^1\text{H-NMR}$  of compound **BIQ-Cl** (400 MHz,  $\text{CDCl}_3$ , 25  $^\circ\text{C}$ )

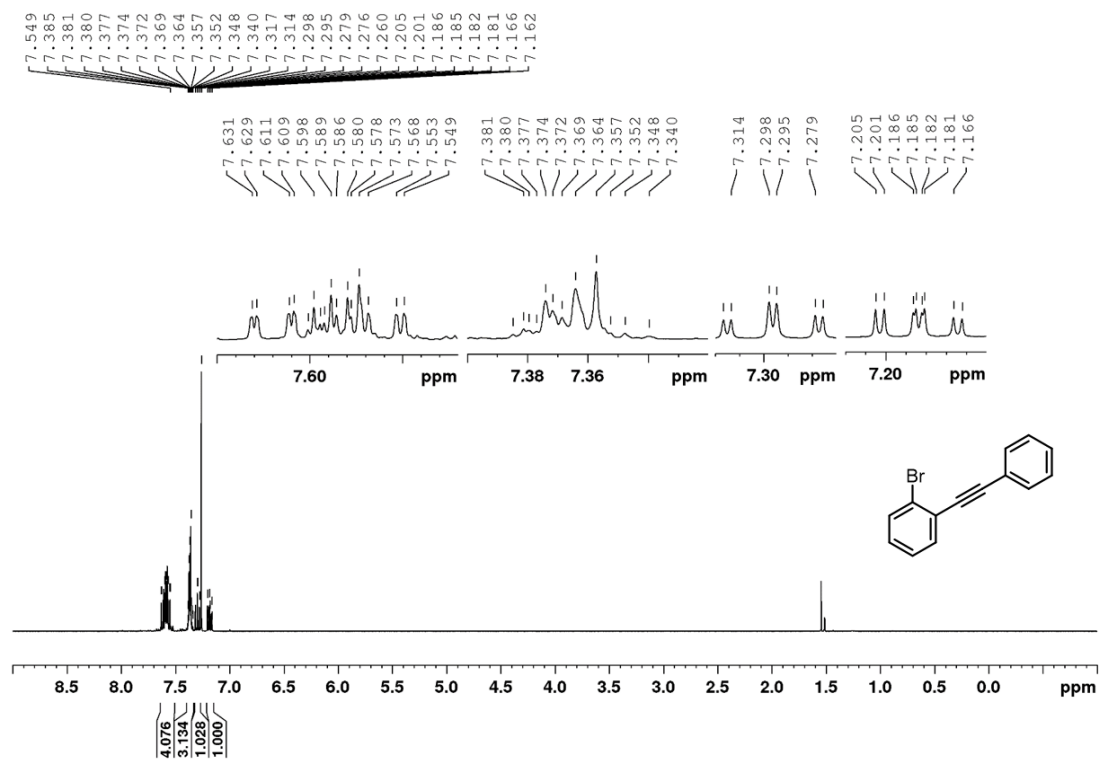

Figure S6.  $^1\text{H-NMR}$  of compound **10** (400 MHz,  $\text{CDCl}_3$ , 25  $^\circ\text{C}$ )

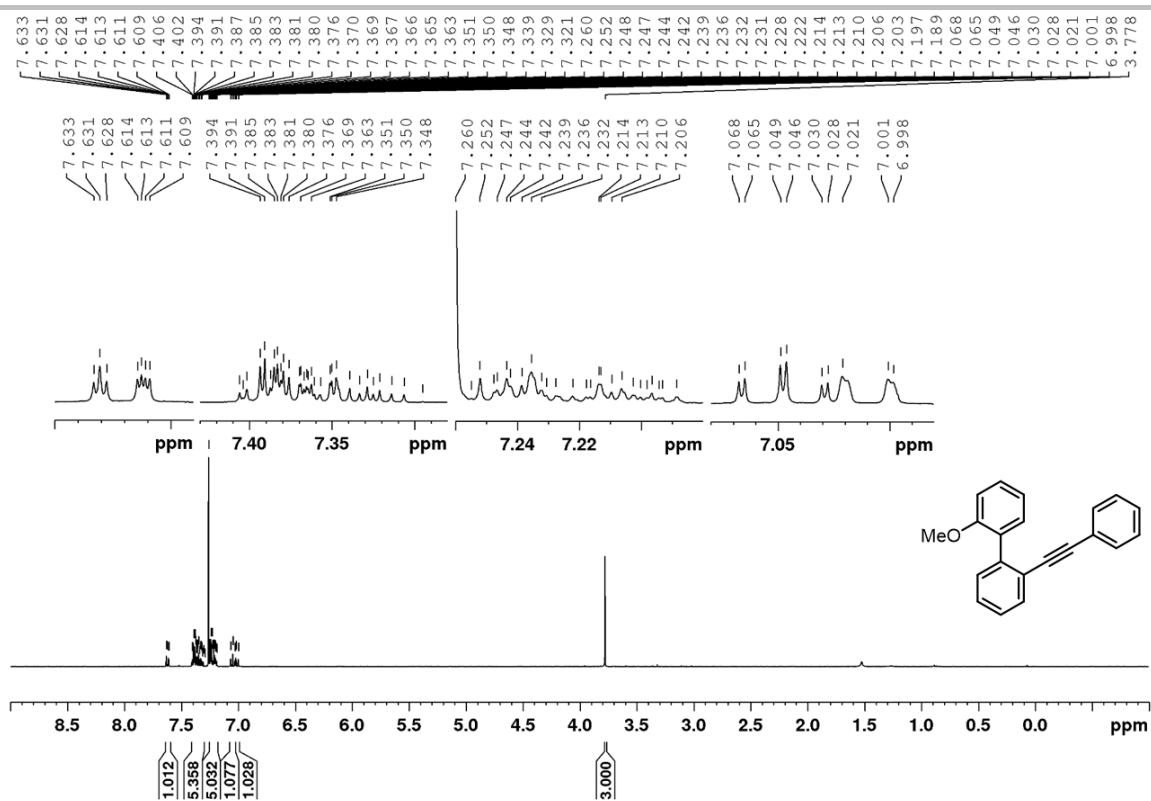

Figure S7.  $^1\text{H-NMR}$  of compound 1 (400 MHz,  $\text{CDCl}_3$ , 25  $^\circ\text{C}$ ).

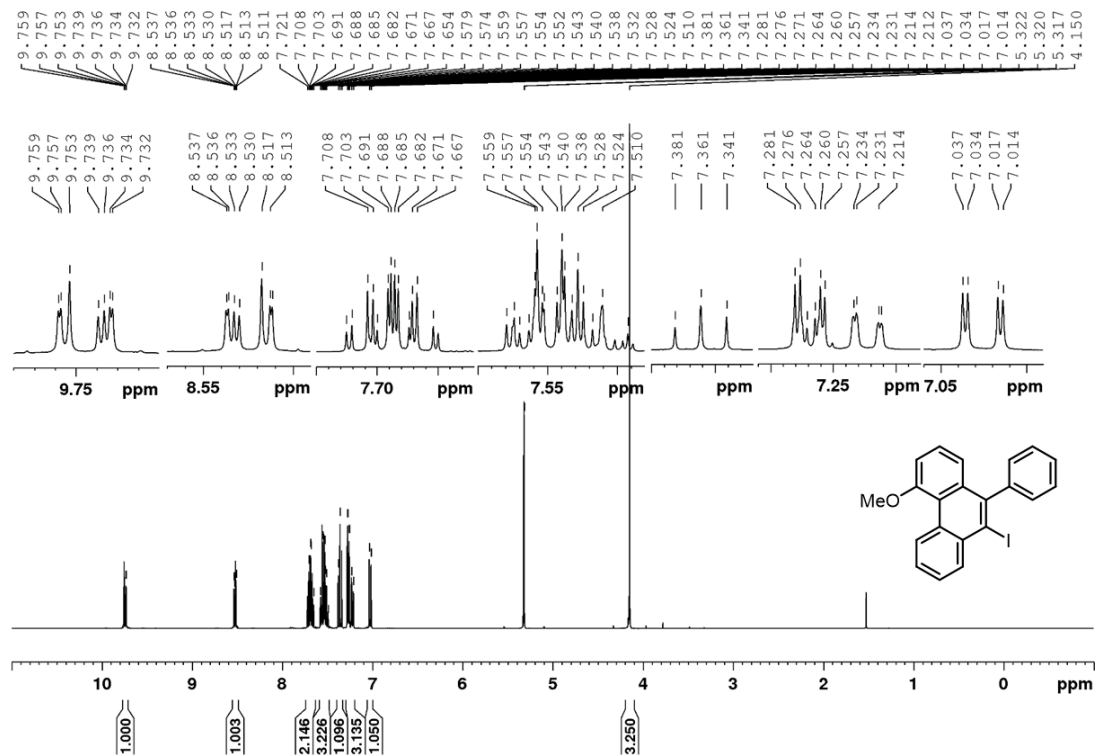

Figure S8.  $^1\text{H-NMR}$  of compound 2 (400 MHz,  $\text{CD}_2\text{Cl}_2$ , 25  $^\circ\text{C}$ ).



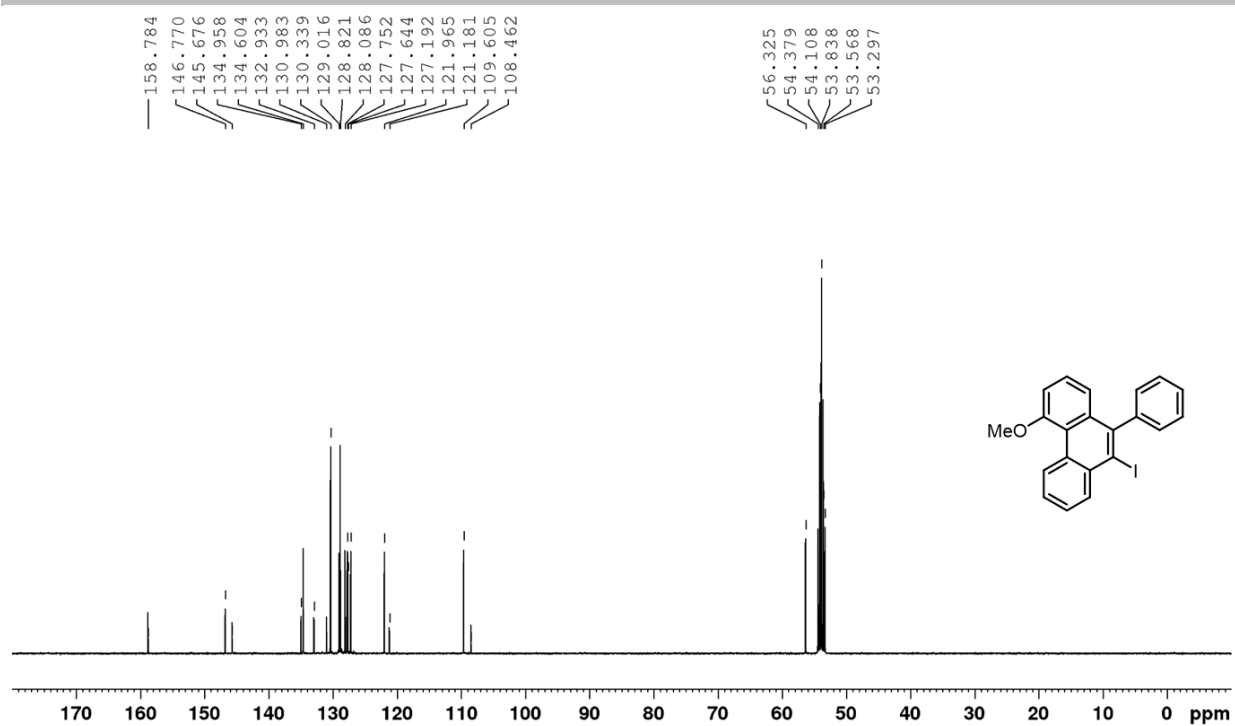

Figure S9. <sup>13</sup>C-NMR of compound 2 (100 MHz, CD<sub>2</sub>Cl<sub>2</sub>, 25°C).

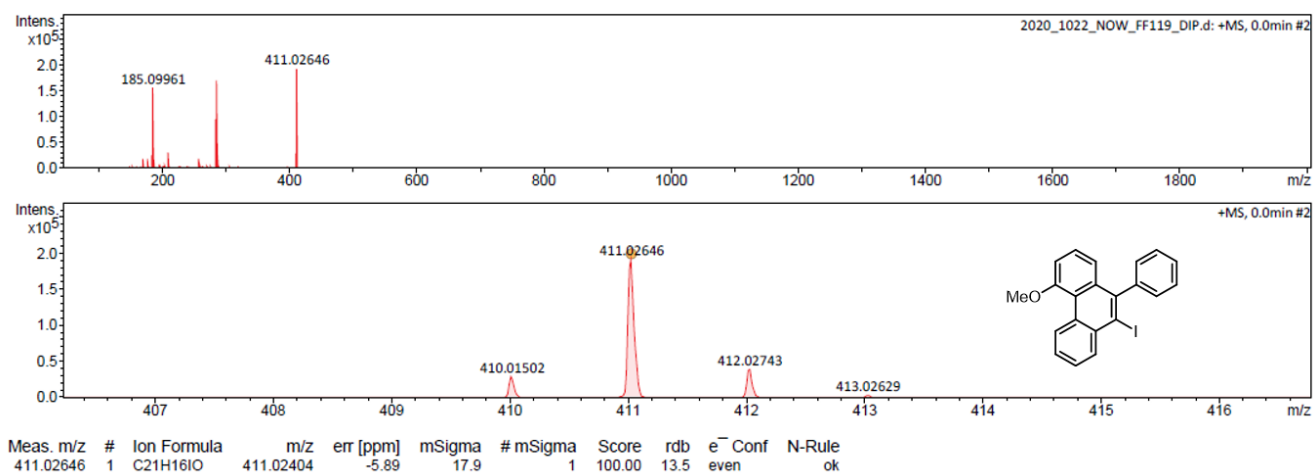

Figure S10. HRMS-(APCI-DIP) spectrum of compound 2.

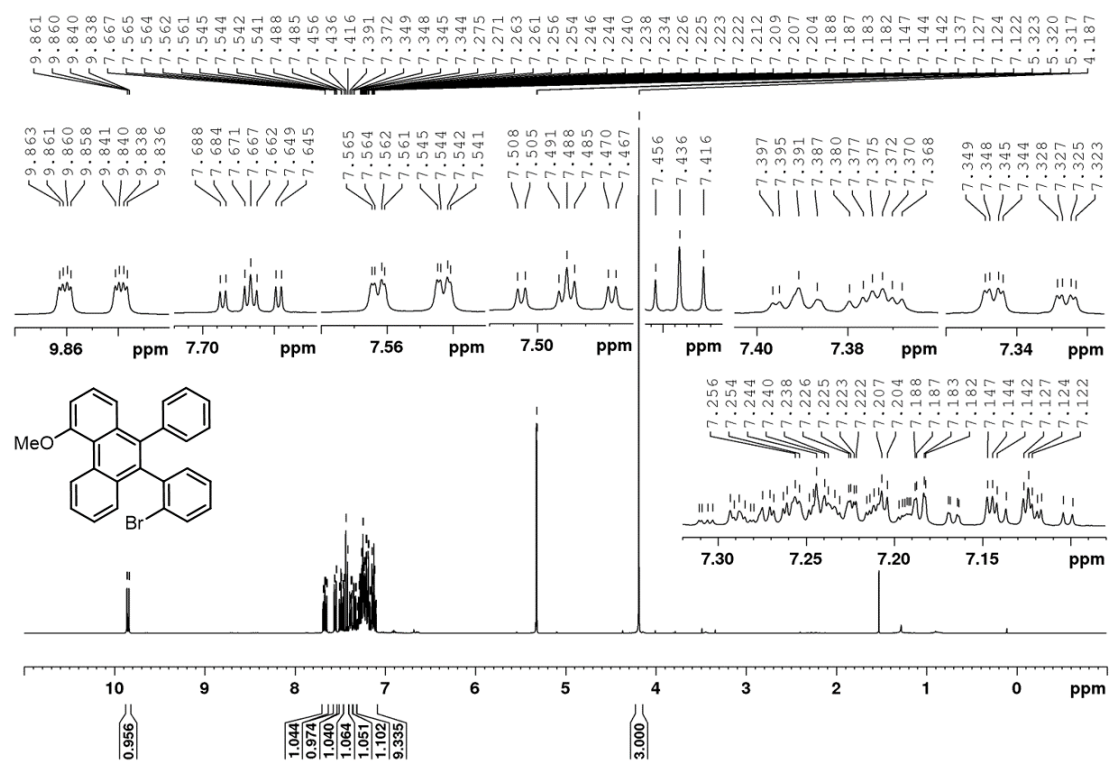

Figure S11. <sup>1</sup>H-NMR of compound 3 (400 MHz, CD<sub>2</sub>Cl<sub>2</sub>, 25 °C).

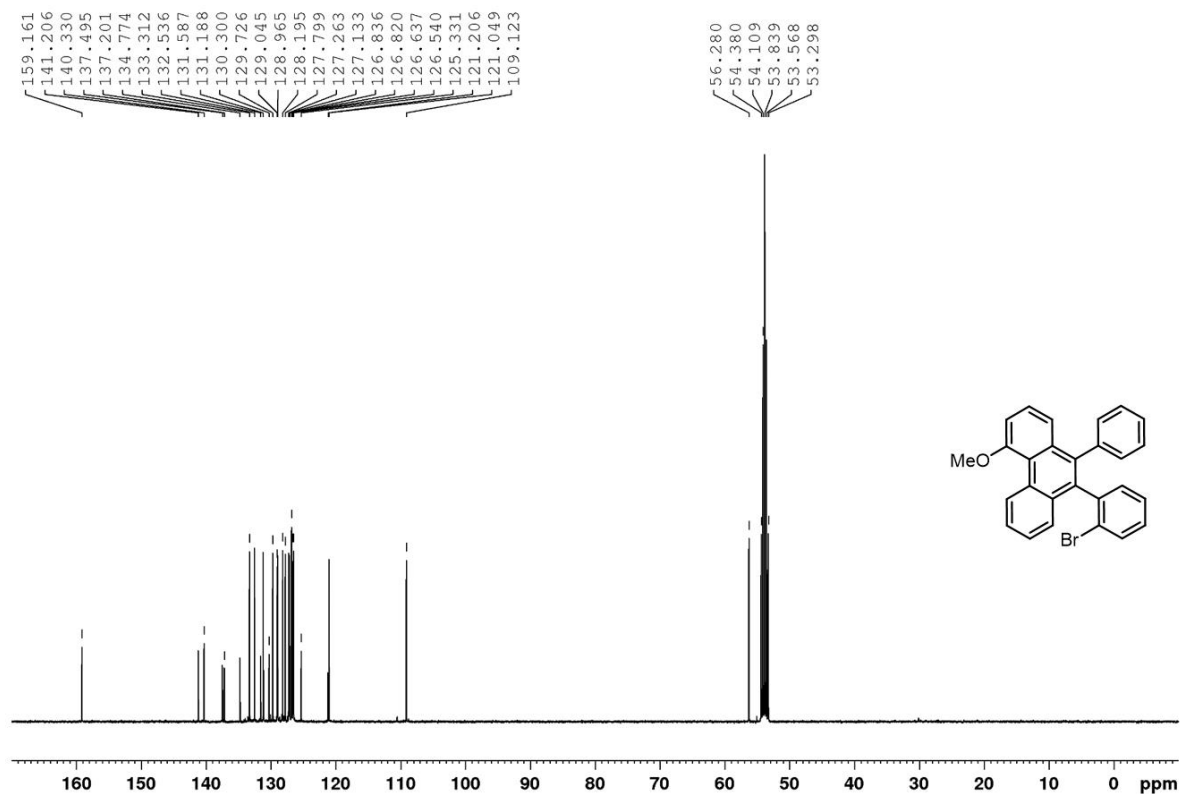

Figure S12. <sup>13</sup>C-NMR of compound 3 (100 MHz, CD<sub>2</sub>Cl<sub>2</sub>, 25 °C).

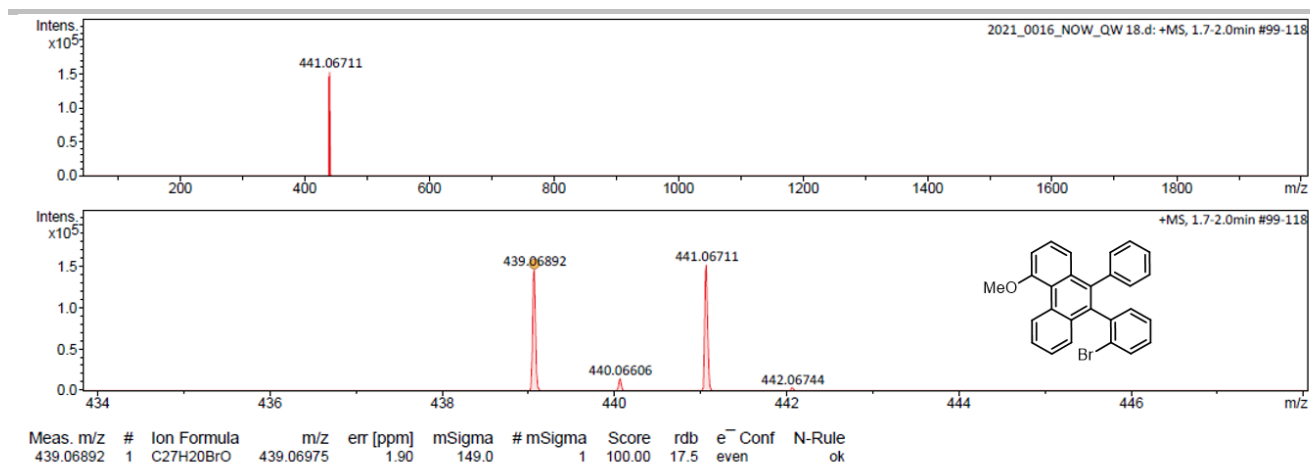

Figure S13. HRMS (ESI) spectrum of compound 3.

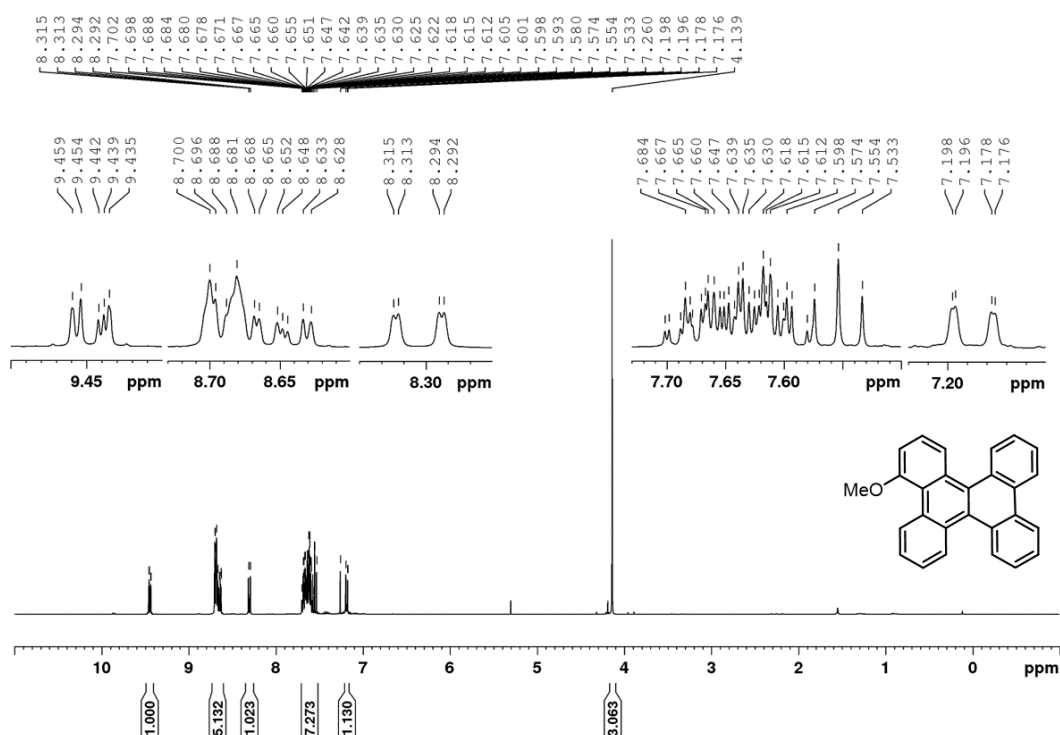

Figure S14. <sup>1</sup>H-NMR of compound DBzC-OMe (400 MHz, CDCl<sub>3</sub>, 25 °C).

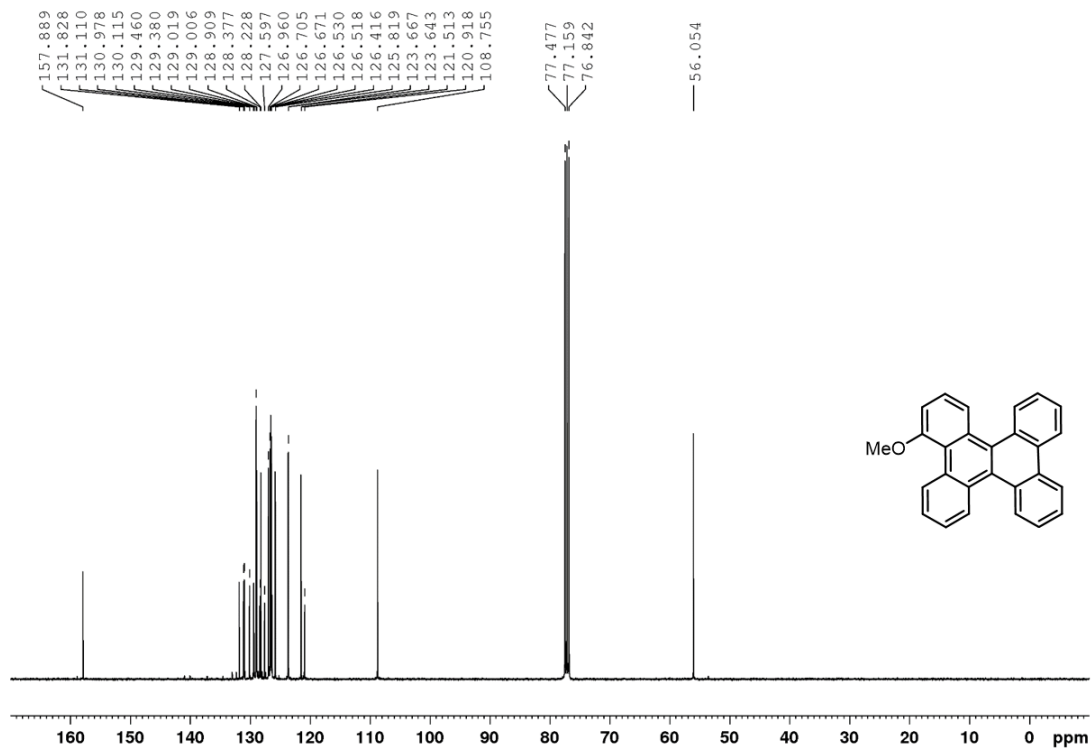

Figure S15. <sup>13</sup>C-NMR of compound DBzC-OMe (100 MHz, CDCl<sub>3</sub>, 25 °C).

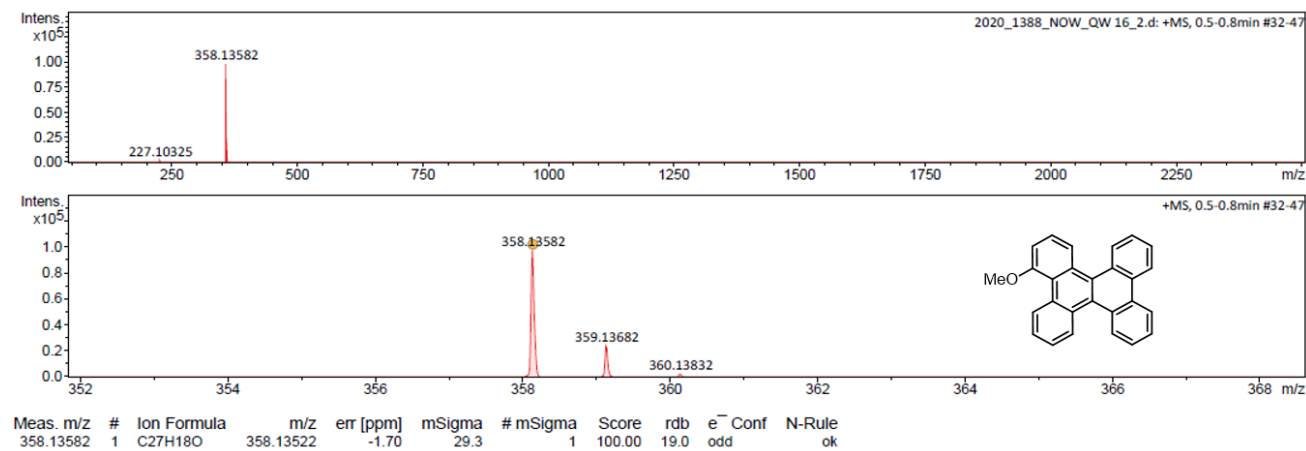

Figure S16. HRMS (ESI) spectrum of compound DBzC-OMe.

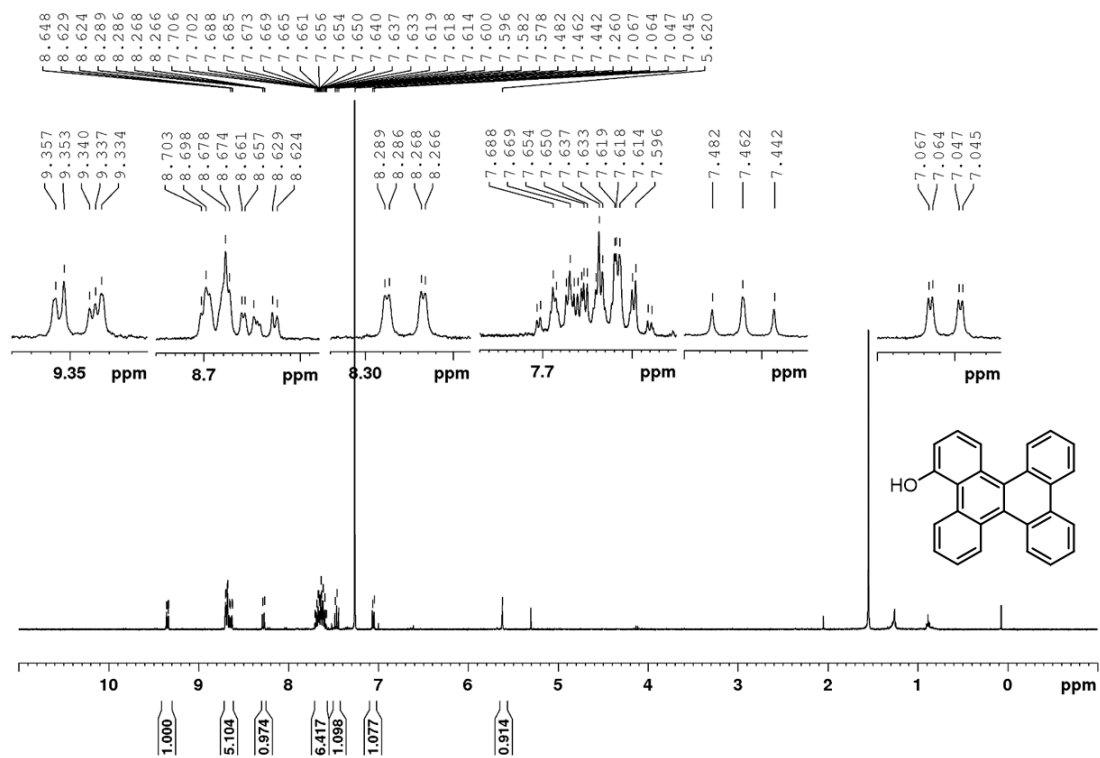

Figure S17.  $^1\text{H-NMR}$  of compound DBzC-OH (400 MHz,  $\text{CDCl}_3$ , 25 °C).

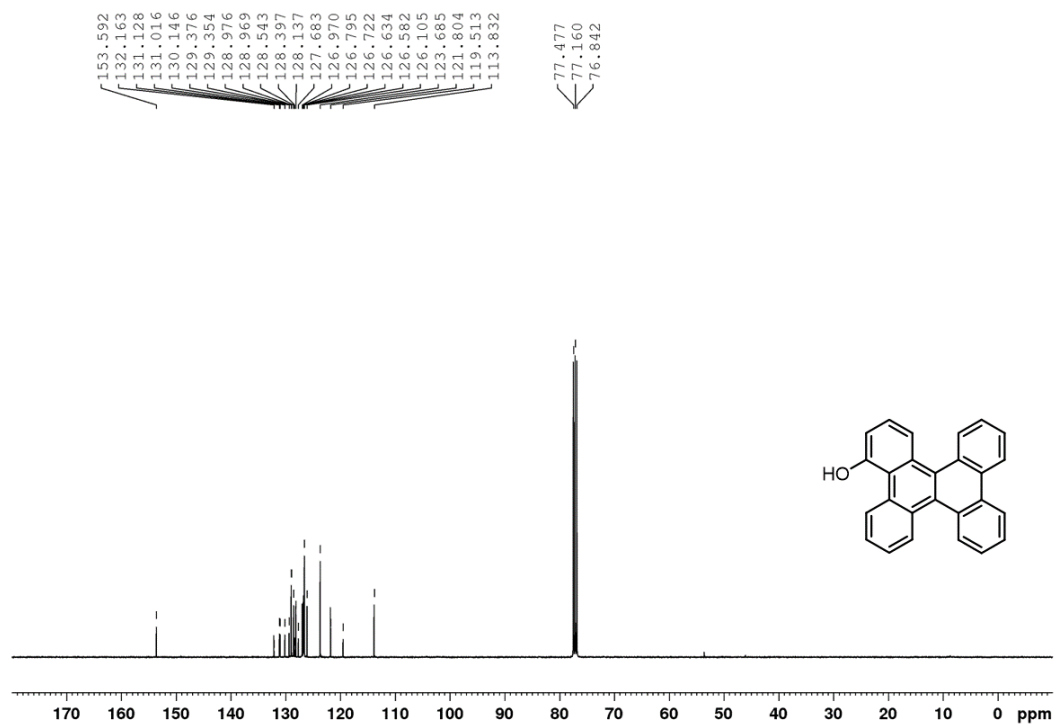

Figure S18.  $^{13}\text{C-NMR}$  of compound DBzC-OH (100 MHz,  $\text{CDCl}_3$ , 25 °C).

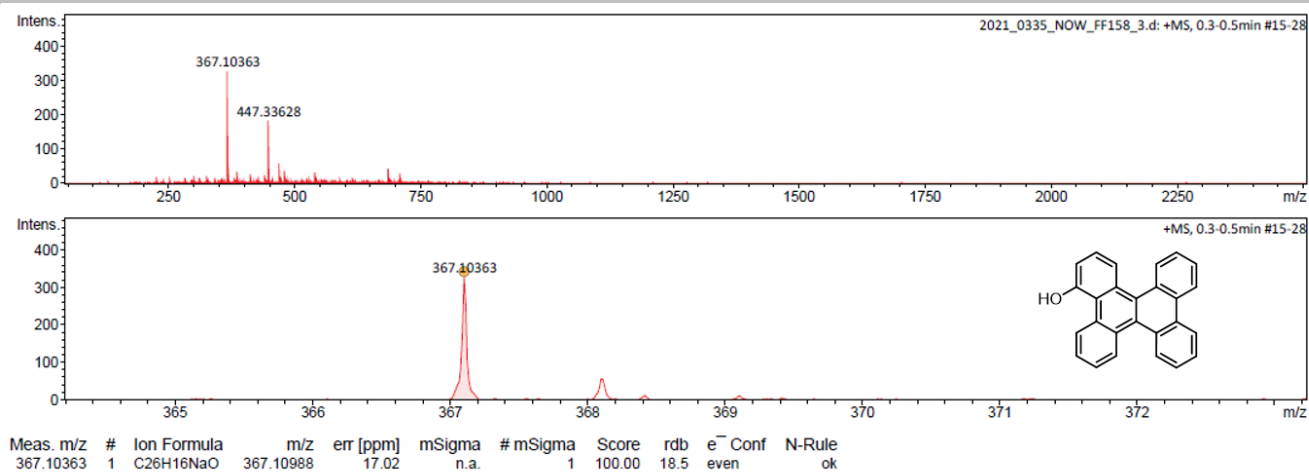

Figure S19. HRMS (ESI) spectrum of compound DBzC-OH.

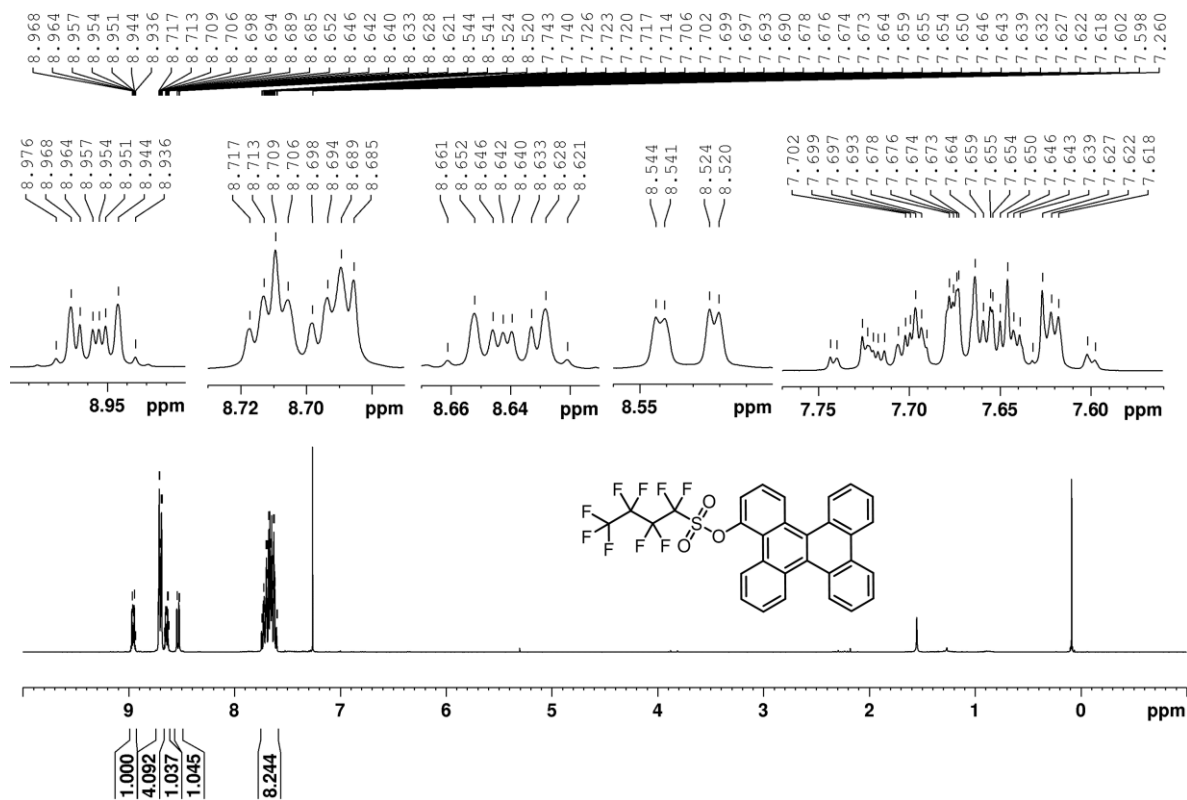

Figure S20. <sup>1</sup>H-NMR of compound DBzC-ONf (400 MHz, CDCl<sub>3</sub>, 25 °C).

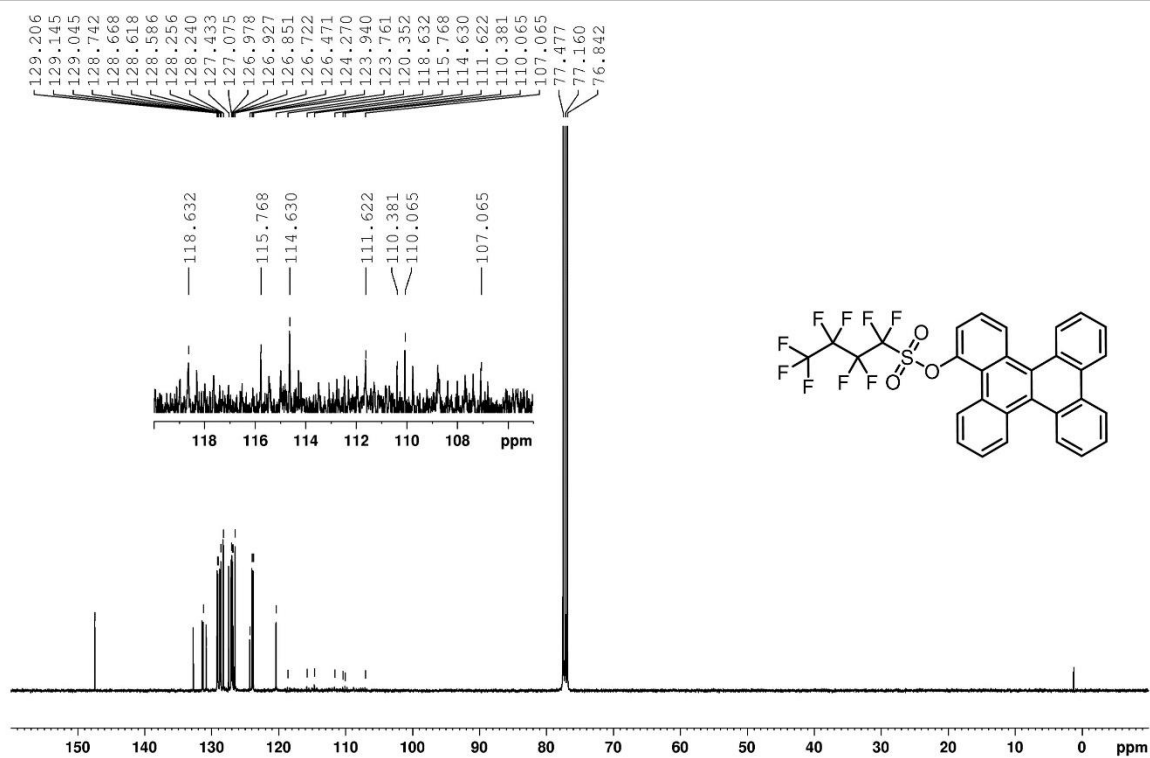

Figure S21. <sup>13</sup>C-NMR of compound DBzC-ONf (100 MHz, CDCl<sub>3</sub>, 25 °C).

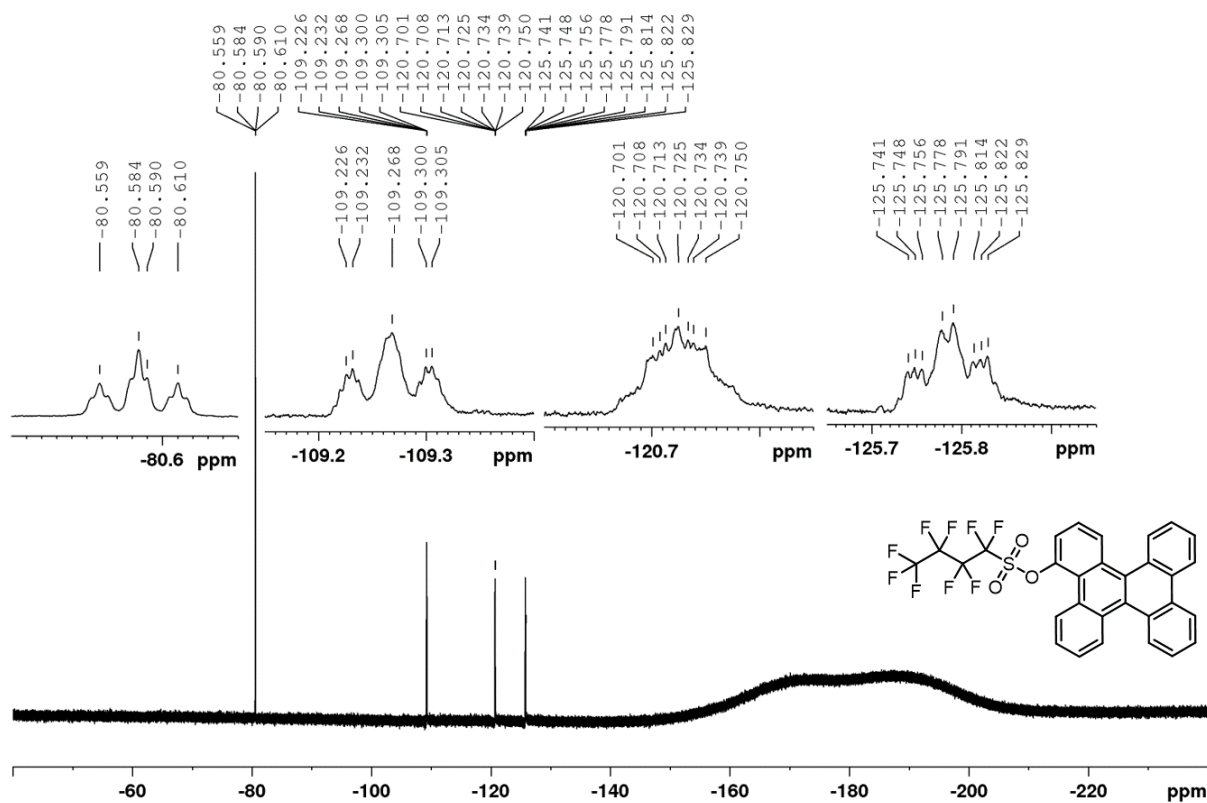

Figure S22. <sup>19</sup>F-NMR of compound DBzC-ONf (376 MHz, CDCl<sub>3</sub>, 25 °C).

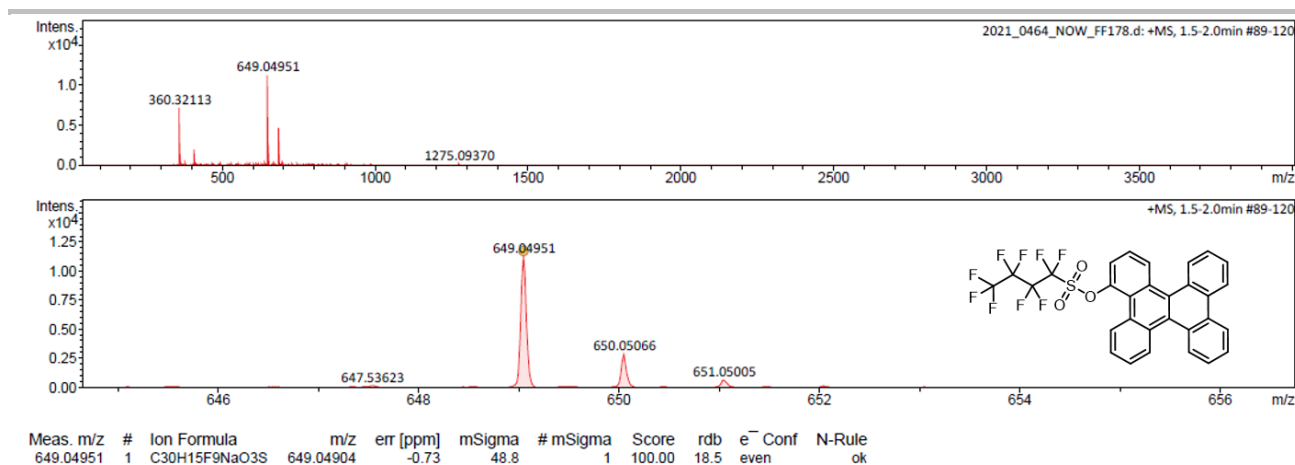

Figure S23. HRMS (ESI) spectrum of compound DBzC-ONf.

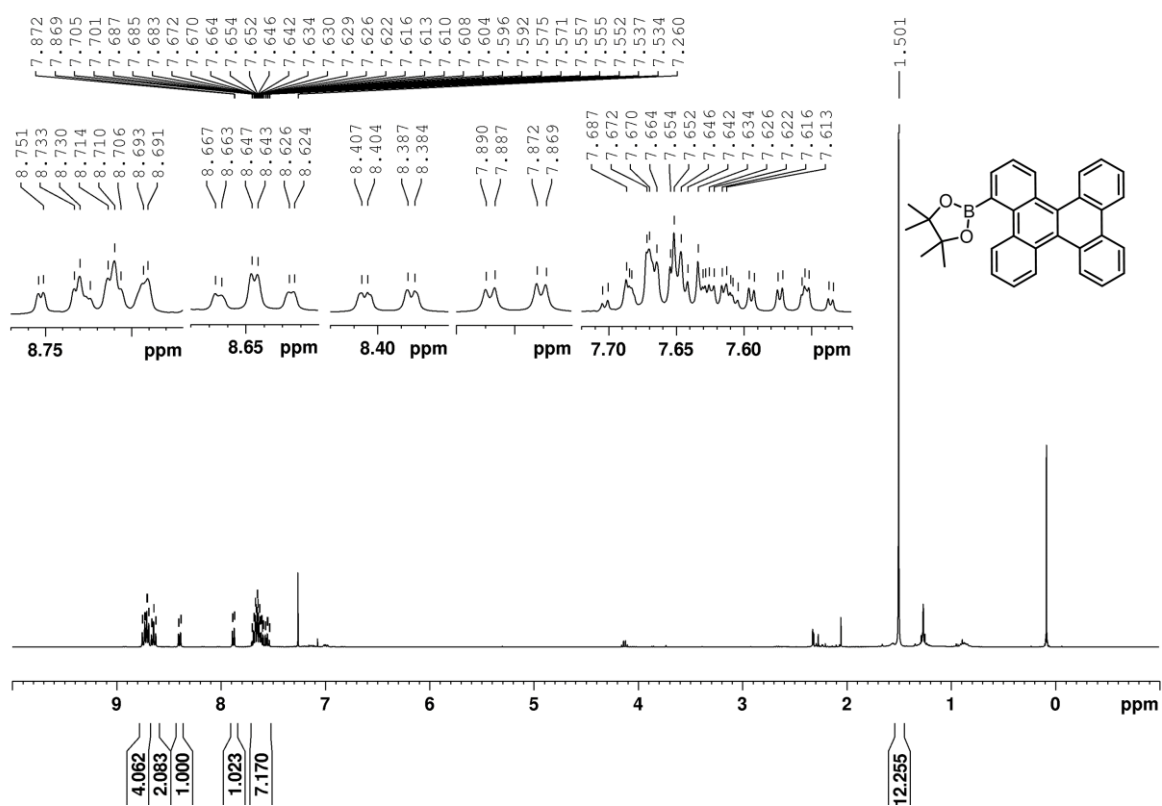

Figure S24. <sup>1</sup>H-NMR of compound DBzC-Bpin (400 MHz, CDCl<sub>3</sub>, 25 °C).



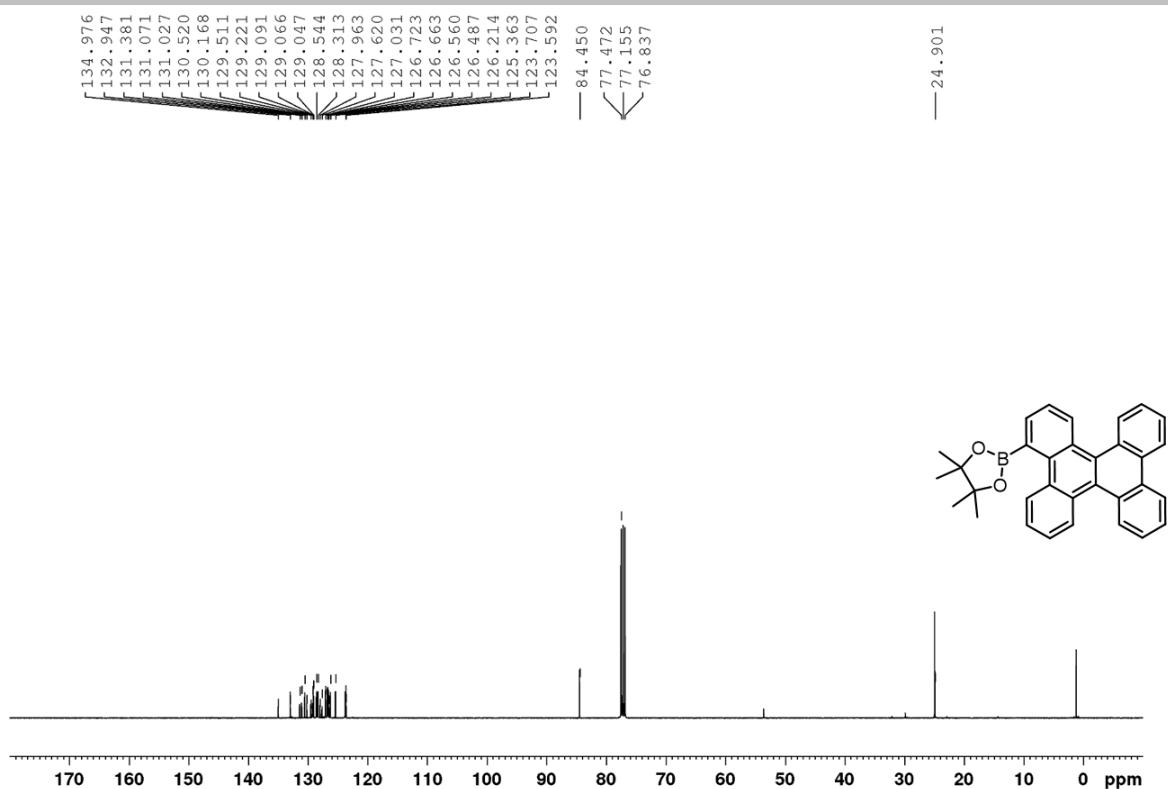

Figure S25.  $^{13}\text{C}$ -NMR of compound DBzC-Bpin (100 MHz,  $\text{CDCl}_3$ , 25  $^\circ\text{C}$ ).

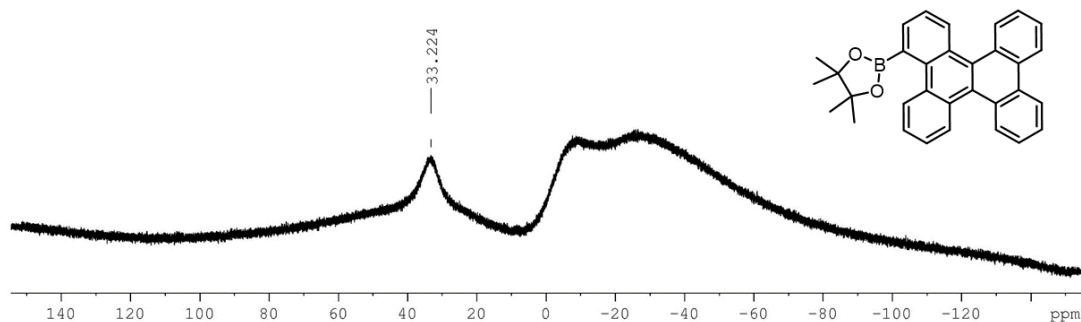

Figure S26.  $^{11}\text{B}$ -NMR of compound DBzC-Bpin (128 MHz,  $\text{CDCl}_3$ , 25  $^\circ\text{C}$ ).

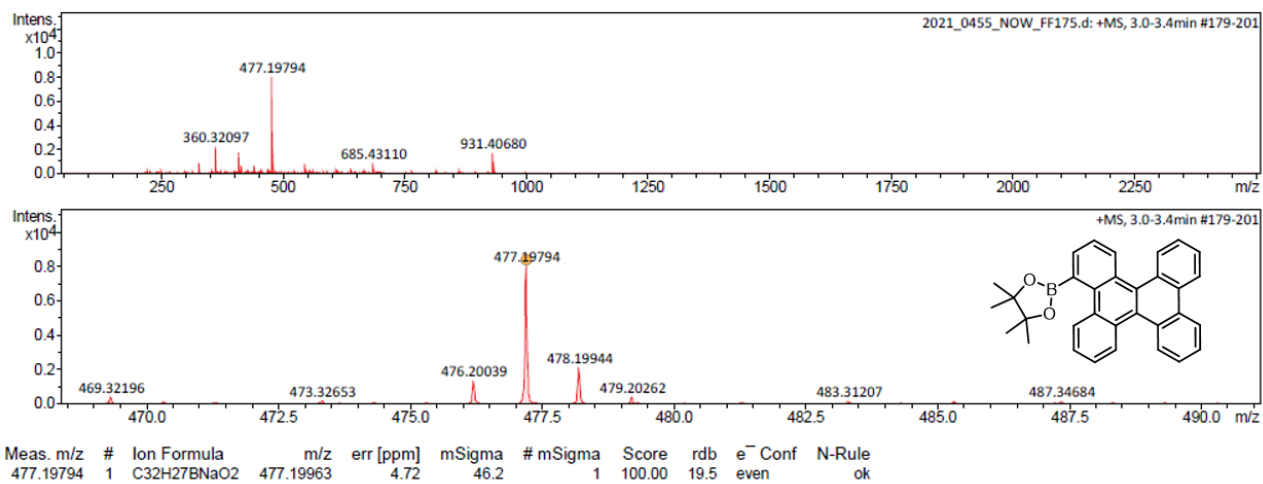

Figure S27. HRMS (ESI) spectrum of compound DBzC-Bpin.

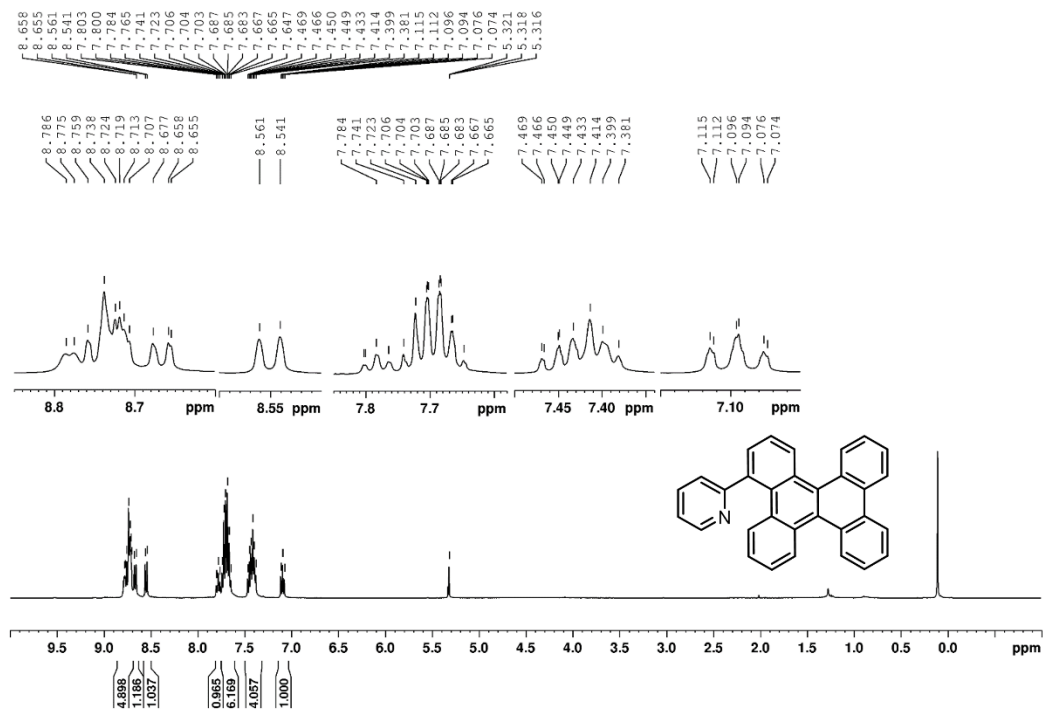

Figure S28. <sup>1</sup>H-NMR of compound BA1 (400 MHz, CD<sub>2</sub>Cl<sub>2</sub>, 25 °C).

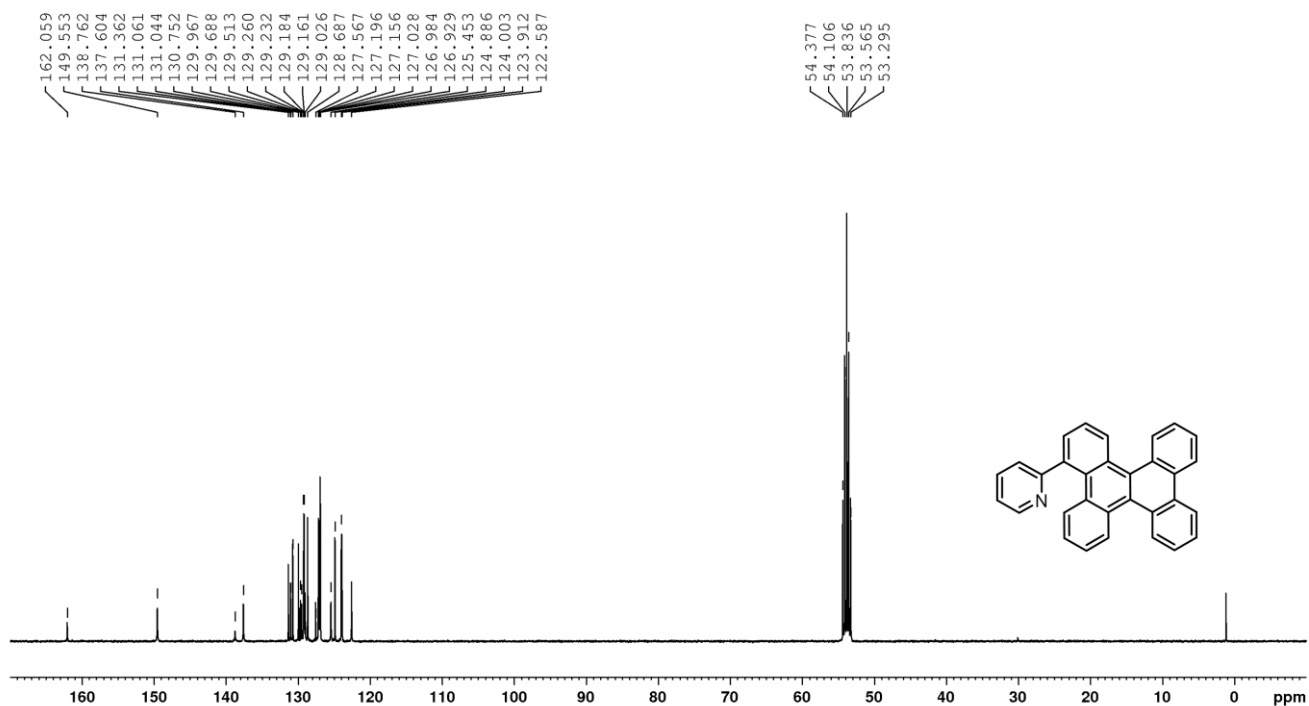

Figure S29. <sup>13</sup>C-NMR of compound BA1 (400 MHz, CD<sub>2</sub>Cl<sub>2</sub>, 25 °C).

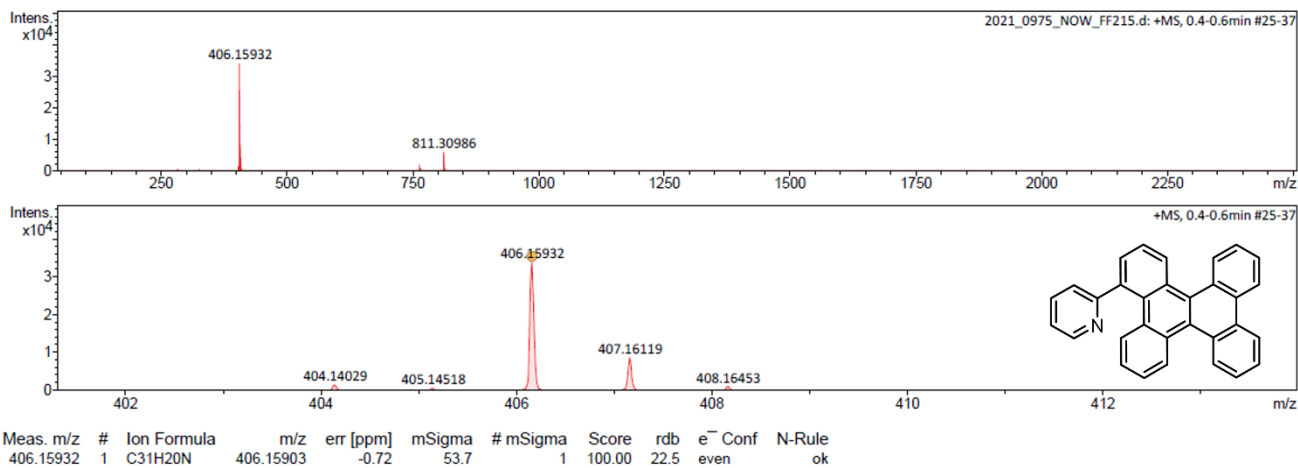

Figure S30. HRMS (ESI) spectrum of compound BA1.

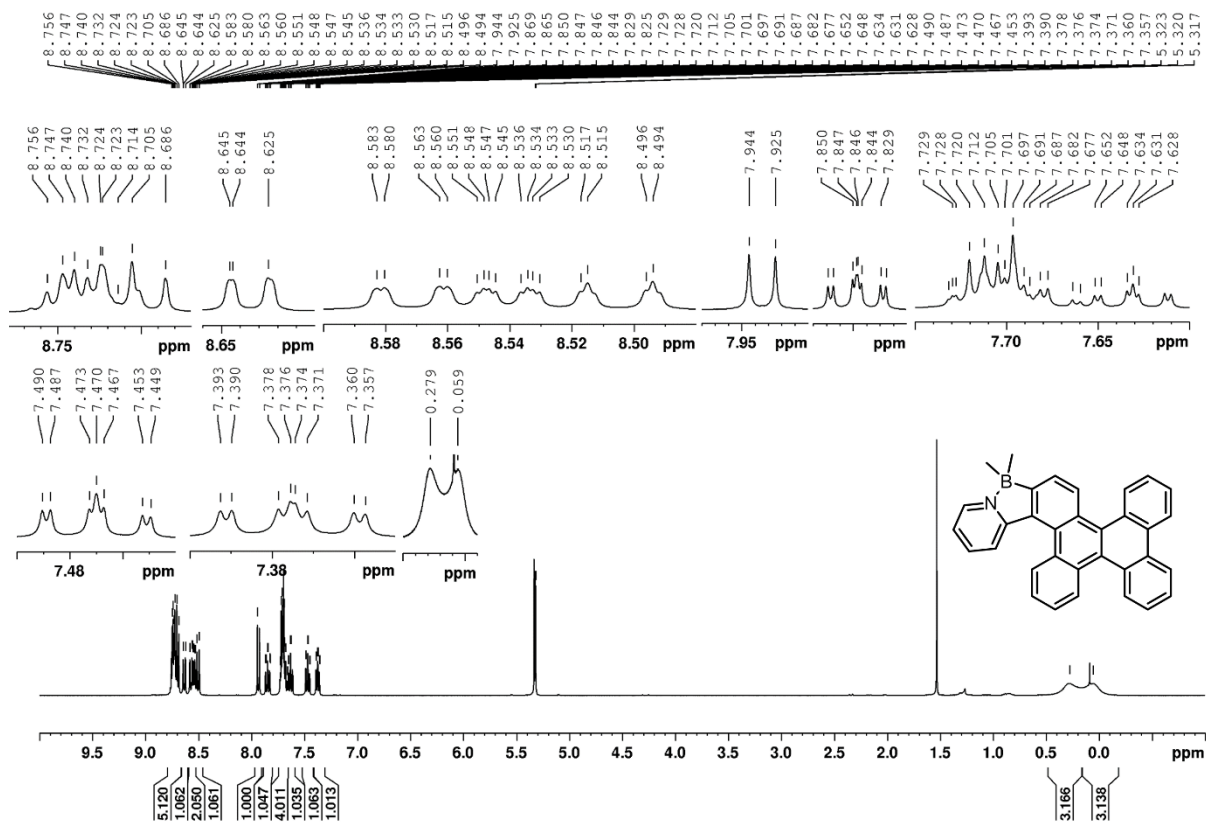

Figure S31. <sup>1</sup>H-NMR of compound EH1 (400 MHz, CD<sub>2</sub>Cl<sub>2</sub>, 25 °C).

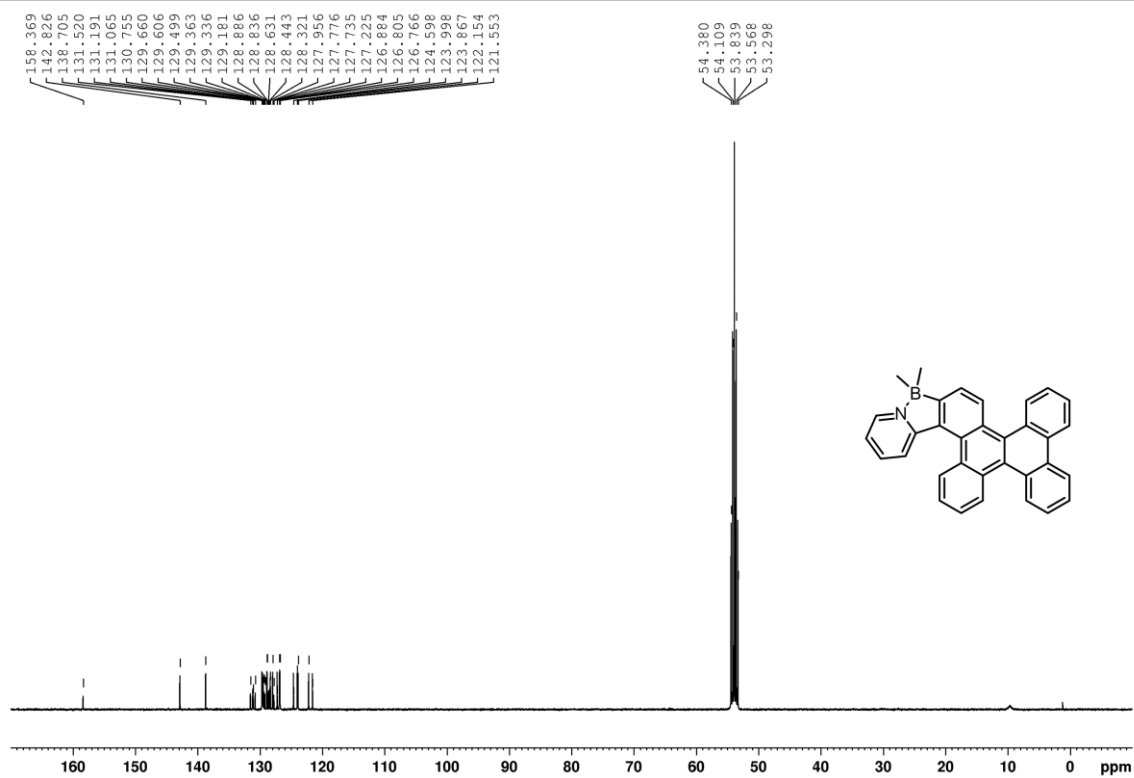

Figure S32.  $^{13}\text{C}$ -NMR of compound EH1 (100 MHz,  $\text{CD}_2\text{Cl}_2$ , 25  $^\circ\text{C}$ ).

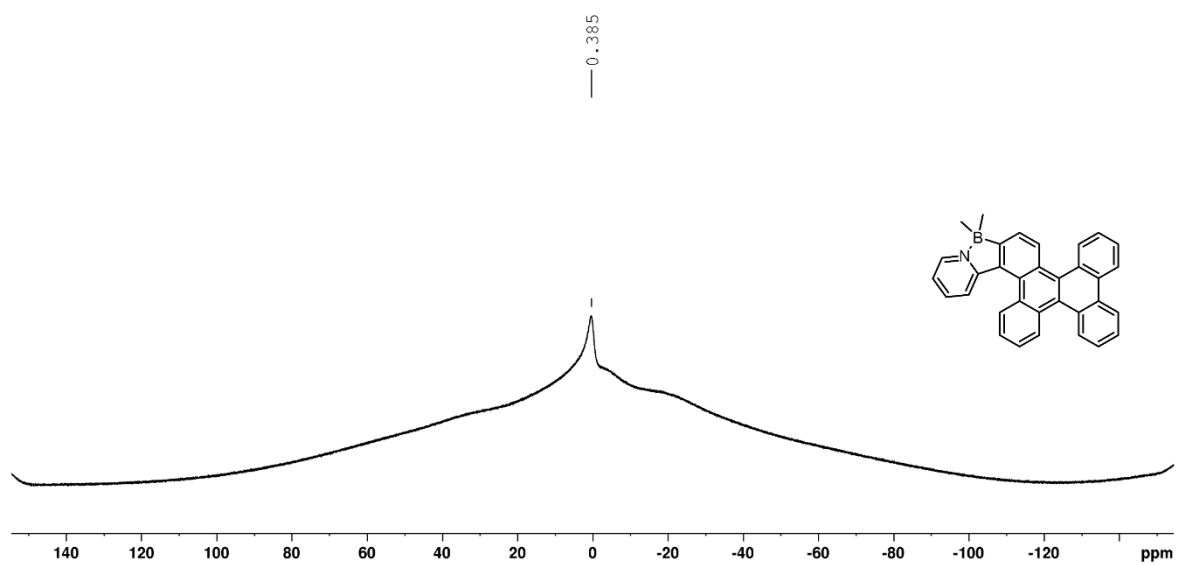

Figure S33.  $^{11}\text{B}$ -NMR of compound EH1 (128 MHz,  $\text{CD}_2\text{Cl}_2$ , 25  $^\circ\text{C}$ ).

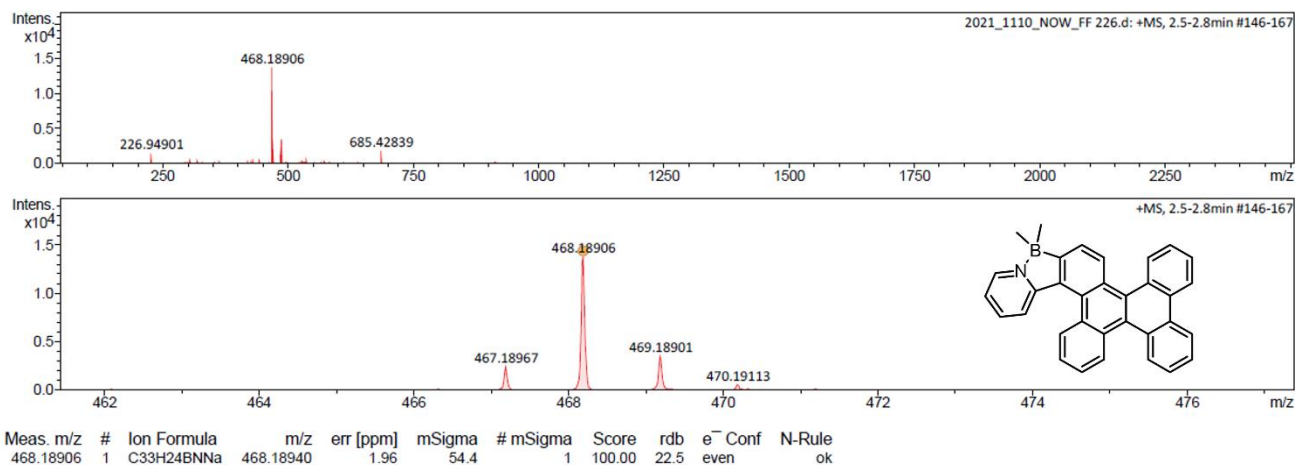

Figure S34. HRMS (ESI) spectrum of compound EH1.

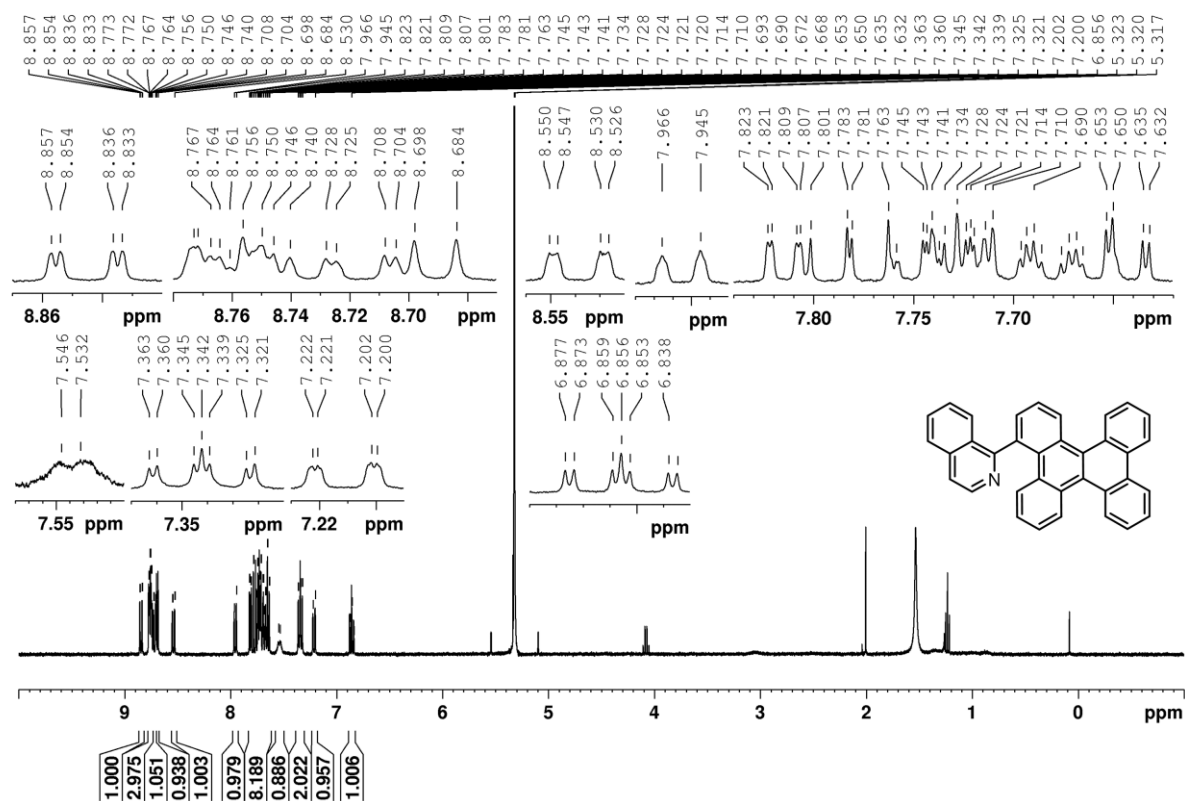

Figure S35. <sup>1</sup>H-NMR of compound BA2 (400 MHz, CD<sub>2</sub>Cl<sub>2</sub>, 25 °C).

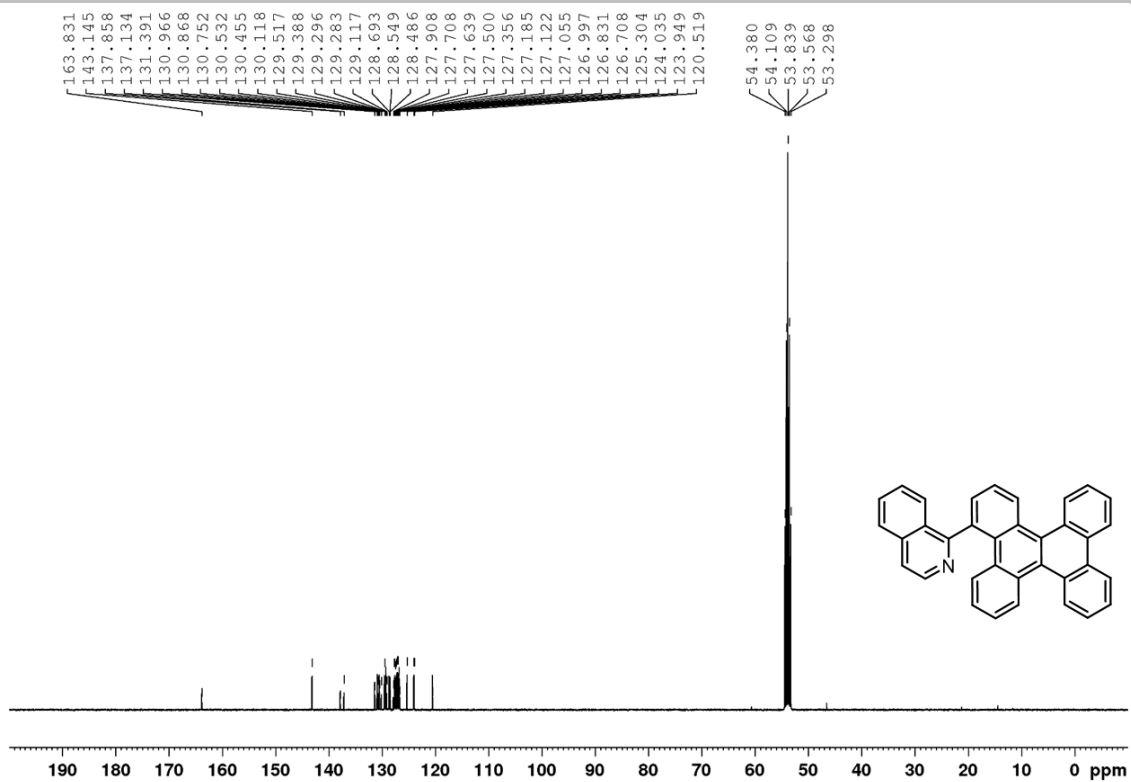

Figure S36. <sup>13</sup>C-NMR of compound BA2 (100 MHz, CD<sub>2</sub>Cl<sub>2</sub>, 25 °C).

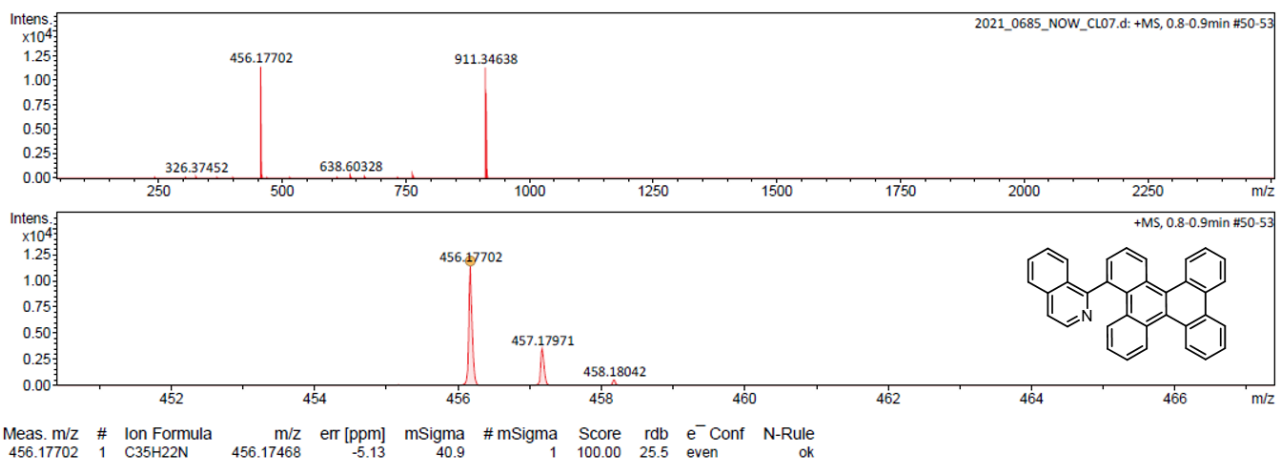

Figure S37. HRMS (ESI) spectrum of compound BA2.

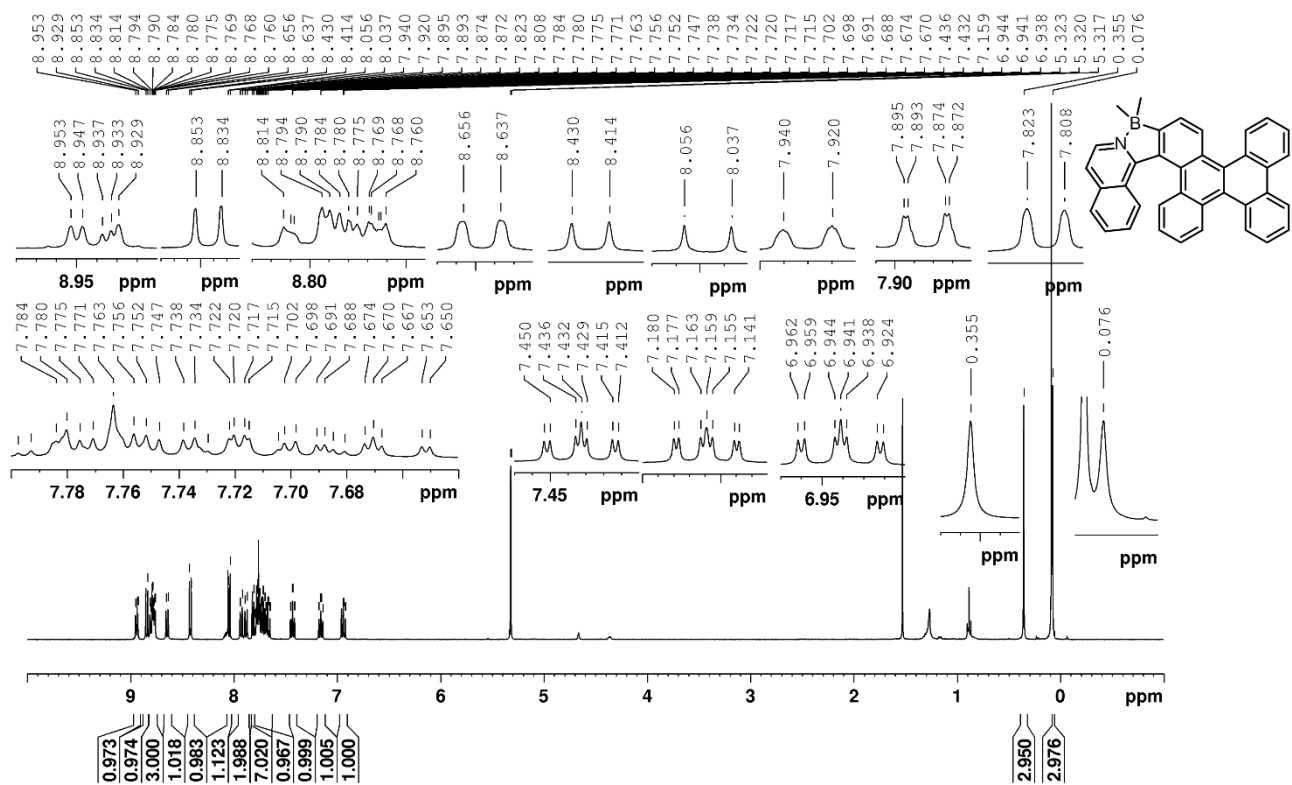

Figure S38. <sup>1</sup>H-NMR of compound EH2 (400 MHz, CD<sub>2</sub>Cl<sub>2</sub>, 25 °C).

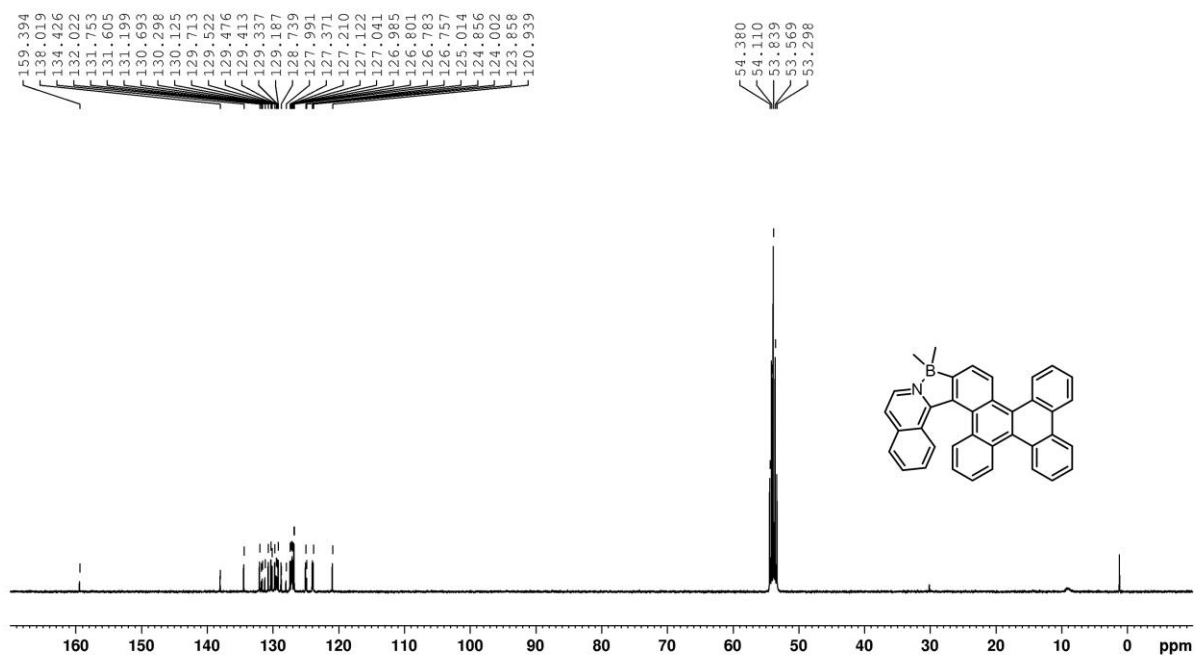

Figure S39. <sup>13</sup>C-NMR of compound EH2 (100 MHz, CD<sub>2</sub>Cl<sub>2</sub>, 25 °C).

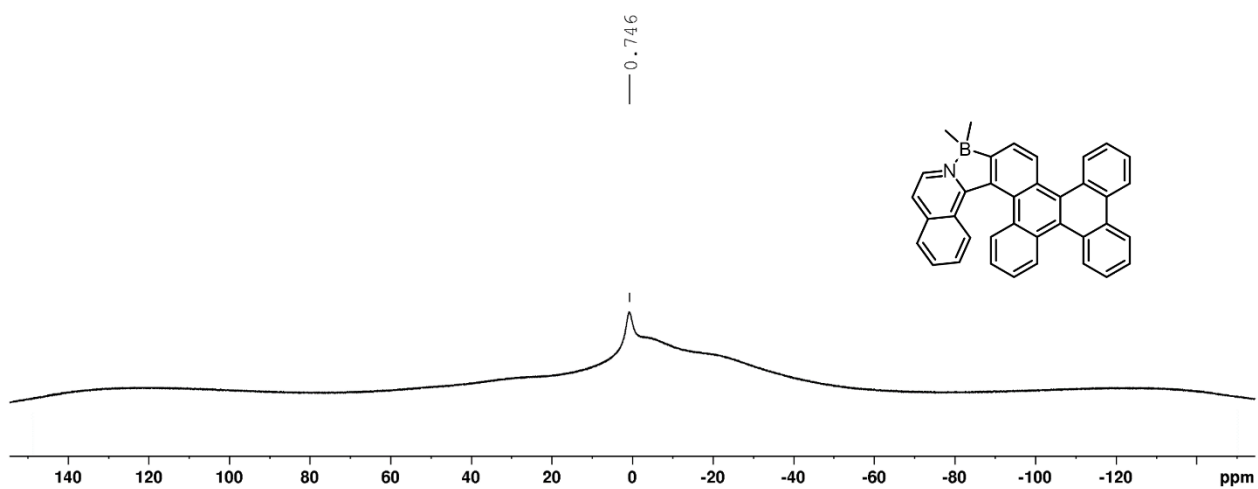

Figure S40.  $^{11}\text{B}$ -NMR of compound EH2 (128 MHz,  $\text{CD}_2\text{Cl}_2$ , 25 °C).

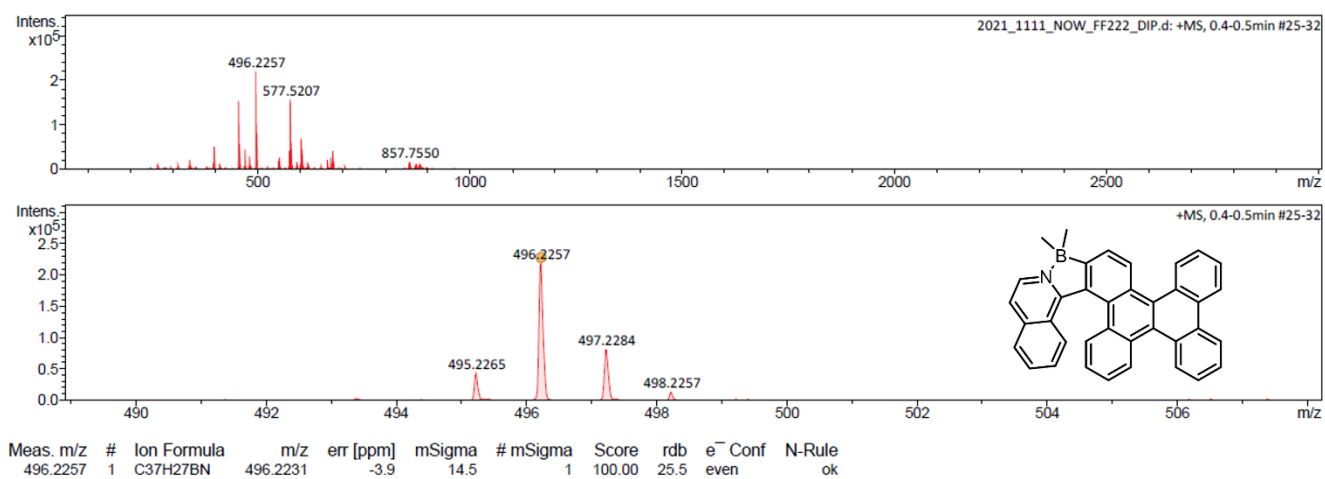

Figure S41. HRMS (APCI-DIP) spectrum of compound EH2.



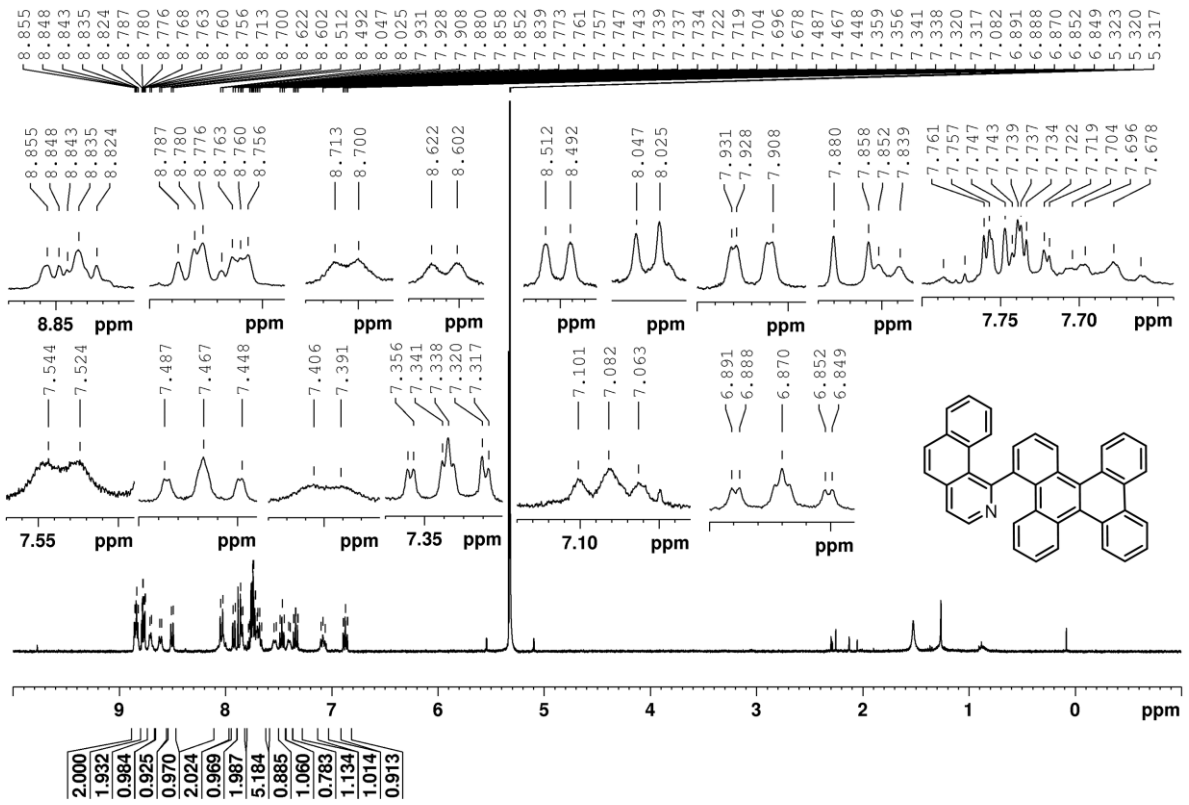

Figure S42. <sup>1</sup>H-NMR of compound BA3 (400 MHz, CD<sub>2</sub>Cl<sub>2</sub>, 25 °C).

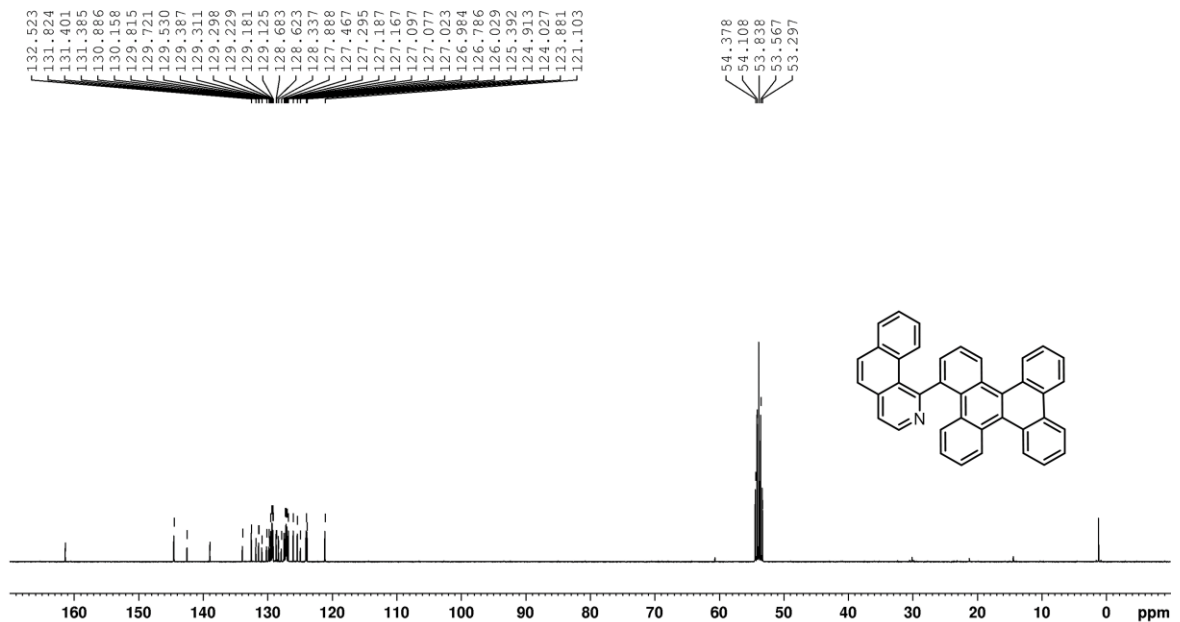

Figure S43. <sup>13</sup>C-NMR of compound BA3 (100 MHz, CD<sub>2</sub>Cl<sub>2</sub>, 25 °C).

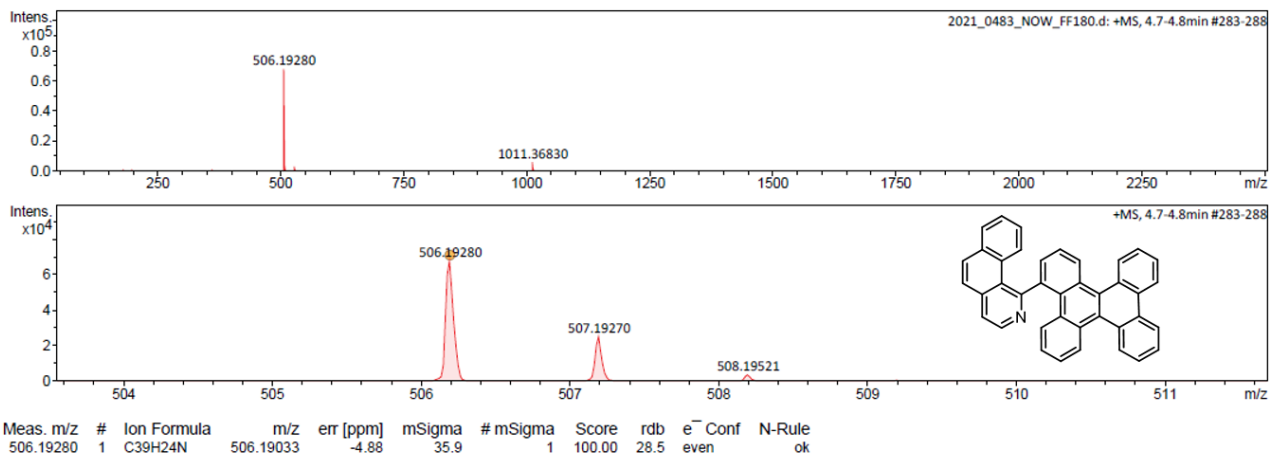

Figure S44. HRMS (ESI) spectrum of compound BA3.

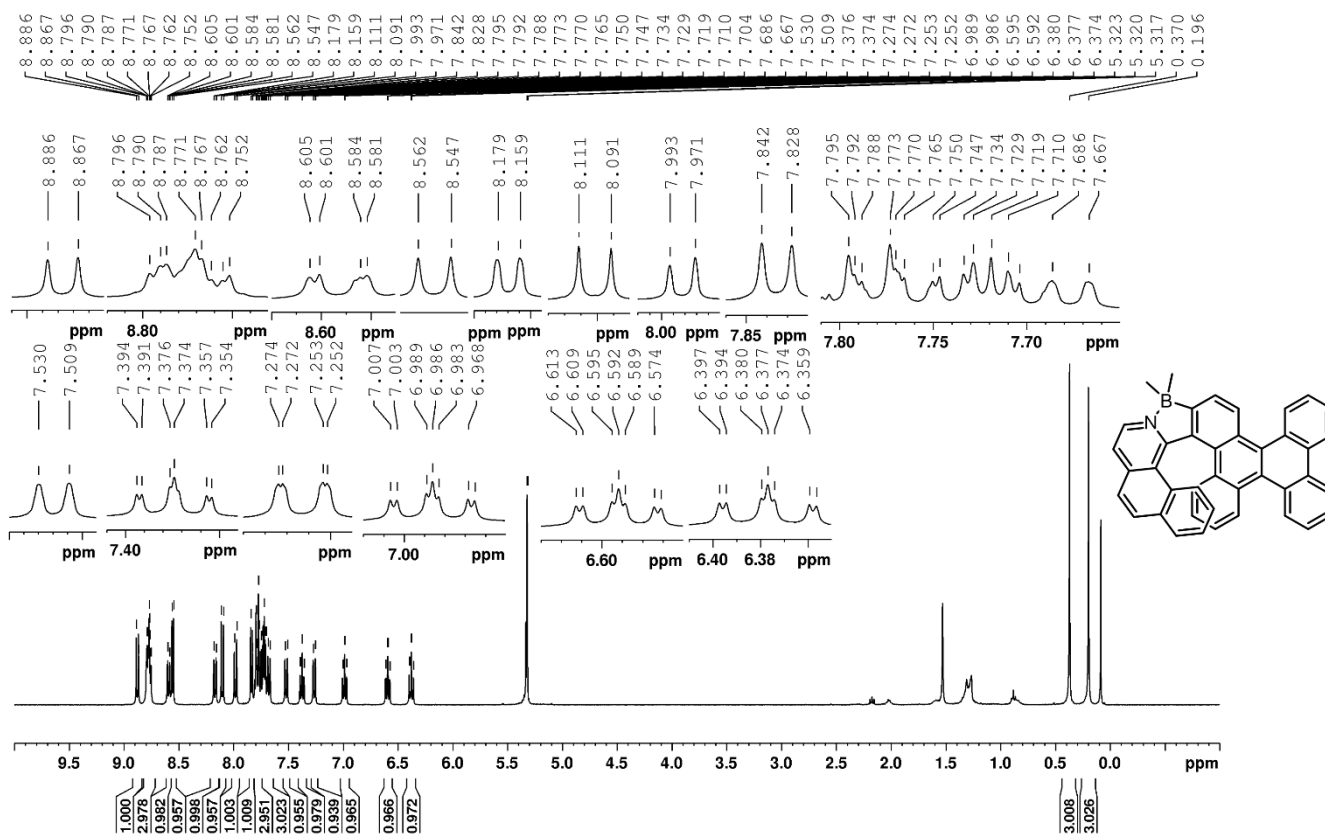

Figure S45. <sup>1</sup>H-NMR of compound EH3 (400 MHz, CD<sub>2</sub>Cl<sub>2</sub>, 25 °C).

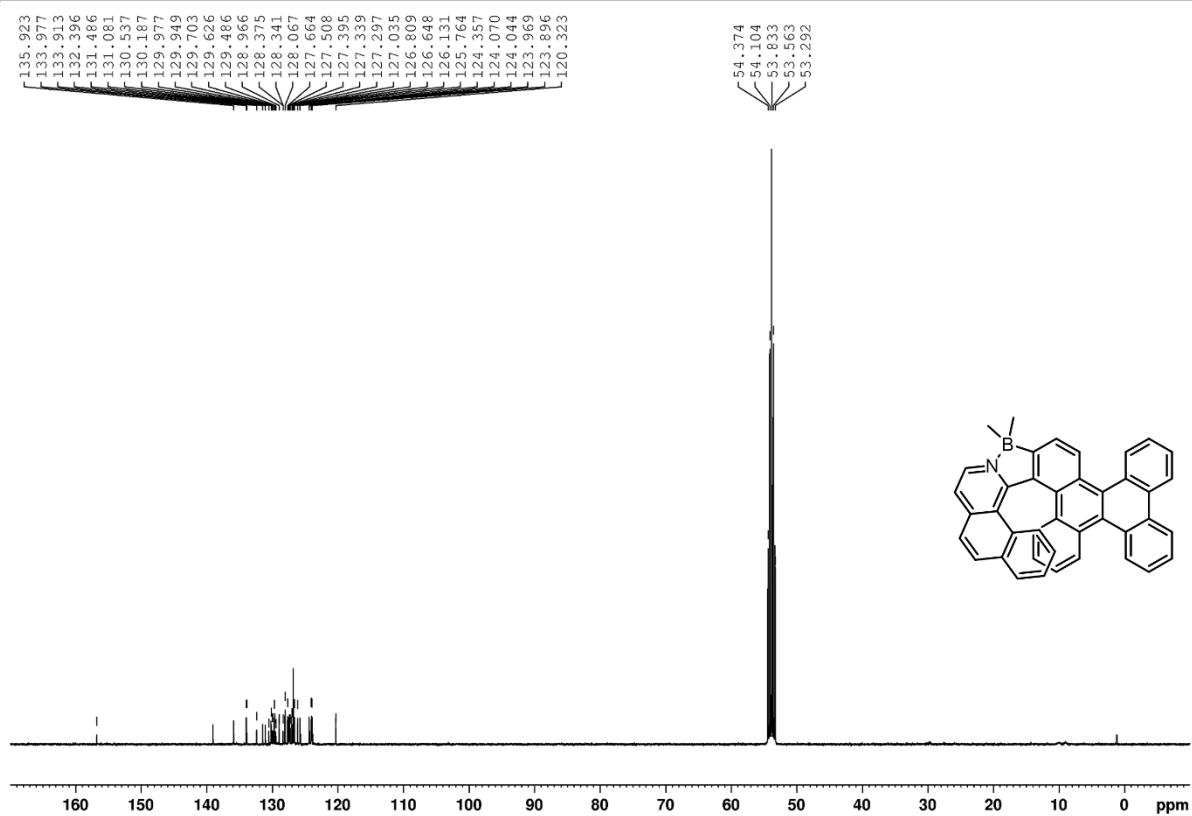

Figure S46.  $^{13}\text{C}$ -NMR of compound EH3 (100 MHz,  $\text{CD}_2\text{Cl}_2$ , 25  $^\circ\text{C}$ ).

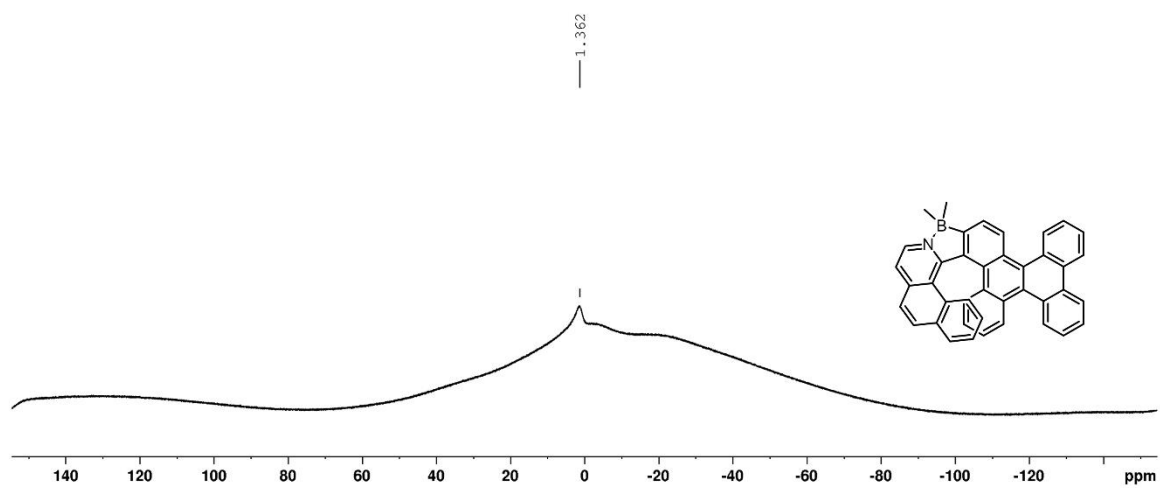

Figure S47.  $^{11}\text{B}$ -NMR of compound EH3 (128 MHz,  $\text{CD}_2\text{Cl}_2$ , 25  $^\circ\text{C}$ ).

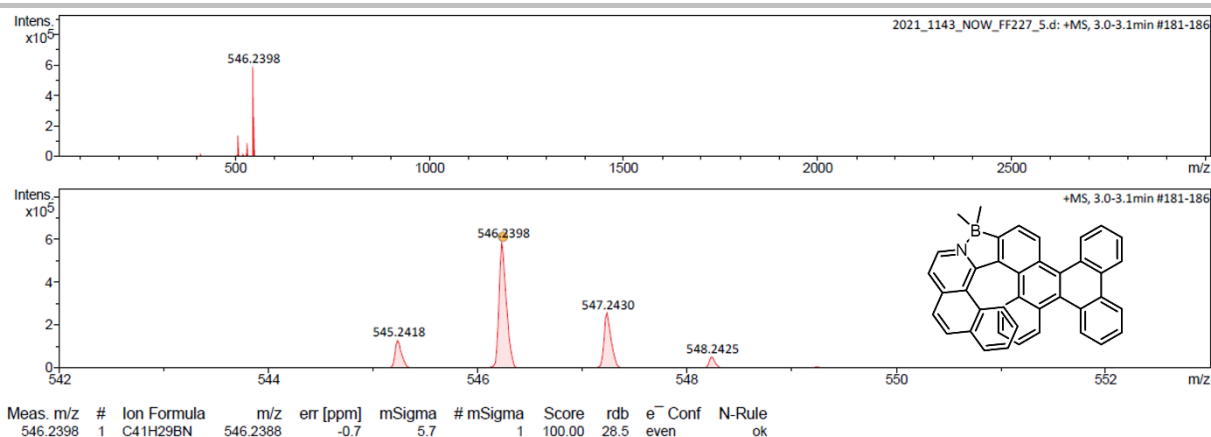

Figure S48. HRMS (APCI-DIP) spectrum of compound EH3.

#### 4. Single crystal X-ray analysis

Single crystal X-ray data for **EH2** and **EH3** were collected at 100 K on a Rigaku XtaLAB Synergy-R diffractometer with a HPA area detector and multi-layer mirror monochromated Cu $\alpha$  radiation. The structure was solved using intrinsic phasing method,<sup>[S7]</sup> refined with the SHELXL program<sup>[S8]</sup> and expanded using Fourier techniques. All non-hydrogen atoms were refined anisotropically. Hydrogen atoms were included in structure factors calculations. All hydrogen atoms were assigned to idealised geometric positions.

Crystallographic data have been deposited with the Cambridge Crystallographic Data Center as supplementary publication no. CCDC-2175284 (**EH2**) and 2175285 (**EH3**). These data can be obtained free of charge from The Cambridge Crystallographic Data Centre via [www.ccdc.cam.ac.uk/data\\_request/cif](http://www.ccdc.cam.ac.uk/data_request/cif).

Crystal data for **EH2**: C<sub>37</sub>H<sub>26</sub>BN,  $M_r$  = 495.40, yellow block, 0.462×0.282×0.252 mm<sup>3</sup>, space group  $P2_1/n$ ,  $a$  = 10.63720(10) Å,  $b$  = 16.11970(10) Å,  $c$  = 14.90600(10) Å,  $\alpha$  = 90°,  $\beta$  = 92.6900(10)°,  $\gamma$  = 90°,  $V$  = 2553.09(3) Å<sup>3</sup>,  $Z$  = 4,  $\rho_{\text{calcd}}$  = 1.289 g·cm<sup>-3</sup>,  $\mu$  = 0.557 mm<sup>-1</sup>,  $F(000)$  = 1040,  $T$  = 100.00(10) K,  $R_1$  = 0.0397,  $wR_2$  = 0.0972, 5079 independent reflections [ $2\theta \leq 147.414^\circ$ ] and 354 parameters.

Crystal data for **EH3**: C<sub>41</sub>H<sub>28</sub>BN,  $M_r$  = 545.45, orange block, 0.430×0.397×0.209 mm<sup>3</sup>, space group  $P2_1/n$ ,  $a$  = 9.14170(10) Å,  $b$  = 12.94930(10) Å,  $c$  = 23.7698(2) Å,  $\alpha$  = 90°,  $\beta$  = 97.3480(10)°,  $\gamma$  = 90°,  $V$  = 2790.73(4) Å<sup>3</sup>,  $Z$  = 4,  $\rho_{\text{calcd}}$  = 1.298 g·cm<sup>-3</sup>,  $\mu$  = 0.562 mm<sup>-1</sup>,  $F(000)$  = 1144,  $T$  = 99.98(10) K,  $R_1$  = 0.0423,  $wR_2$  = 0.1055, 5581 independent reflections [ $2\theta \leq 147.45^\circ$ ] and 390 parameters.

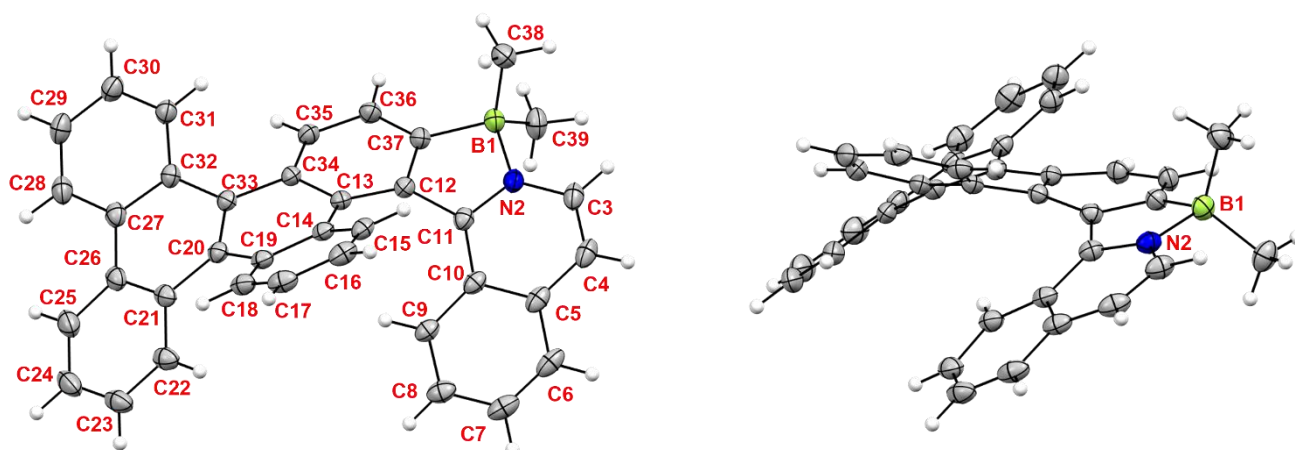

Figure S49. Molecular structure of **EH2** in the solid state. Thermal displacement parameters are displayed at the 50% probability.

**Table S1.** Selected angles of **EH2** in the solid state.

| Angles         |            |
|----------------|------------|
| ∠ (C38-B1-N2)  | 108.33(9)° |
| ∠ (C39-B1-N2)  | 108.33(9)° |
| ∠ (C37-B1-38)  | 110.6(1)°  |
| ∠ (C38-B1-C39) | 114.3(1)°  |
| ∠ (C37-B1-N2)  | 95.97(8)°  |
| ∠ (C37-B1-C39) | 117.3(1)°  |

**Table S2.** Selected bond lengths of **EH2** in the solid state.

| Bond Lengths / Å |          |         |          |         |          |
|------------------|----------|---------|----------|---------|----------|
| B1-N2            | 1.622(2) | C12-C13 | 1.416(1) | C23-C24 | 1.392(2) |
| B1-C37           | 1.610(2) | C12-C37 | 1.402(1) | C24-C25 | 1.373(2) |
| B1-C38           | 1.624(2) | C13-C14 | 1.453(1) | C25-C26 | 1.408(2) |
| B1-C39           | 1.613(2) | C13-C34 | 1.420(1) | C26-C27 | 1.456(1) |
| N2-C3            | 1.363(1) | C14-C15 | 1.410(2) | C27-C28 | 1.406(2) |
| N2-C11           | 1.343(1) | C14-C19 | 1.410(1) | C27-C32 | 1.419(1) |
| C3-C4            | 1.360(2) | C15-C16 | 1.377(2) | C28-C29 | 1.375(2) |
| C4-C5            | 1.414(2) | C16-C17 | 1.397(2) | C29-C30 | 1.392(2) |
| C5-C6            | 1.420(2) | C17-C18 | 1.376(2) | C30-C31 | 1.380(2) |
| C5-C10           | 1.423(2) | C18-C19 | 1.415(1) | C31-C32 | 1.414(1) |
| C6-C7            | 1.364(2) | C19-C20 | 1.456(1) | C32-C33 | 1.461(1) |
| C7-C8            | 1.411(2) | C20-C21 | 1.453(1) | C33-C34 | 1.466(1) |
| C8-C9            | 1.372(2) | C20-C33 | 1.395(1) | C34-C35 | 1.420(1) |
| C9-C10           | 1.419(2) | C21-C22 | 1.419(1) | C35-C36 | 1.382(1) |
| C10-C11          | 1.430(1) | C21-C26 | 1.411(2) | C36-C37 | 1.403(2) |
| C11-C12          | 1.474(1) | C22-C23 | 1.376(2) |         |          |

**Table S3.** Crystallographic data for single crystal X-ray analysis of **EH2**.

|                                                                |                                                    |
|----------------------------------------------------------------|----------------------------------------------------|
| Empirical formula                                              | C <sub>37</sub> H <sub>26</sub> BN                 |
| Formula weight (g·mol <sup>-1</sup> )                          | 495.40                                             |
| Temperature (K)                                                | 100.00(10)                                         |
| Radiation, $\lambda$ (Å)                                       | CuK $\alpha$ , 1.54184                             |
| Crystal system                                                 | monoclinic                                         |
| Space group                                                    | <i>P2<sub>1</sub>/n</i>                            |
| <i>Unit cell dimensions</i>                                    |                                                    |
| <i>a</i> (Å)                                                   | 10.63720(10)                                       |
| <i>b</i> (Å)                                                   | 16.11970(10)                                       |
| <i>c</i> (Å)                                                   | 14.90600(10)                                       |
| $\alpha$ (°)                                                   | 90                                                 |
| $\beta$ (°)                                                    | 92.6900(10)                                        |
| $\gamma$ (°)                                                   | 90                                                 |
| Volume (Å <sup>3</sup> )                                       | 2553.09(3)                                         |
| <i>Z</i>                                                       | 4                                                  |
| Calculated density (Mg·m <sup>-3</sup> )                       | 1.289                                              |
| Absorption coefficient (mm <sup>-1</sup> )                     | 0.557                                              |
| <i>F</i> (000)                                                 | 1040                                               |
| Theta range for collection                                     | 4.042 to 73.707°                                   |
| Reflections collected                                          | 23701                                              |
| Independent reflections                                        | 5079                                               |
| Minimum/maximum transmission                                   | 0.351/1.000                                        |
| Refinement method                                              | Full-matrix least-squares on <i>F</i> <sup>2</sup> |
| Data / parameters / restraints                                 | 5079 / 354 / 0                                     |
| Goodness-of-fit on <i>F</i> <sup>2</sup>                       | 1.046                                              |
| Final R indices [ <i>I</i> > 2 $\sigma$ ( <i>I</i> )]          | R <sub>1</sub> = 0.0378, wR <sub>2</sub> = 0.0957  |
| R indices (all data)                                           | R <sub>1</sub> = 0.0397, wR <sub>2</sub> = 0.0972  |
| Maximum/minimum residual electron density (e·Å <sup>-3</sup> ) | 0.267 / -0.198                                     |

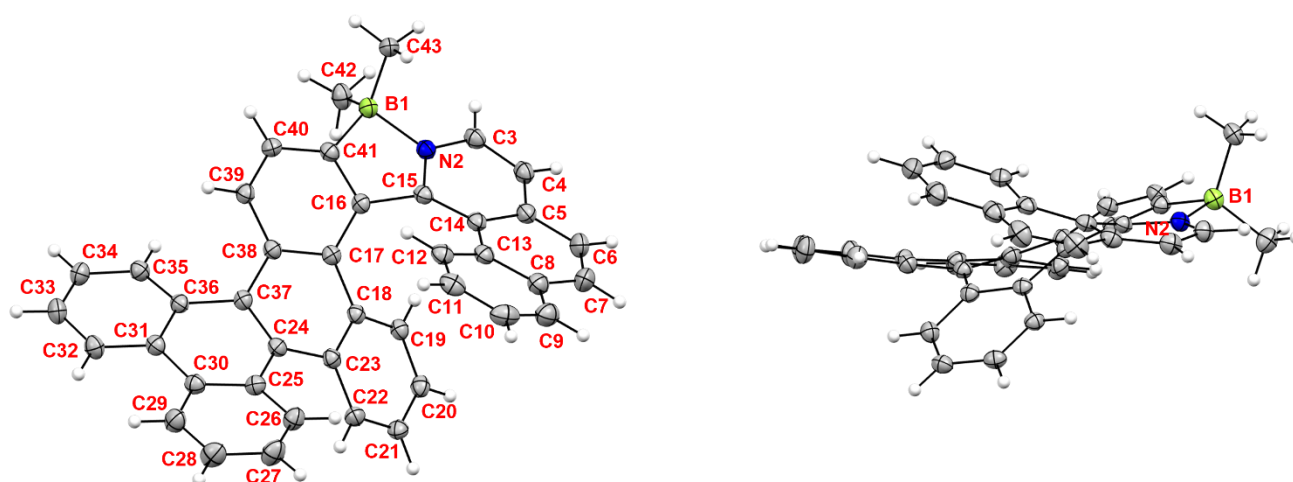

**Figure S50.** Molecular structure of **EH3** in the solid state. Thermal displacement parameters are displayed at the 50%

**Table S4.** Selected angles of **EH3** in the solid state.

| Angles                |                   |
|-----------------------|-------------------|
| $\angle$ (C41-B1-N2)  | 95.49(9) $^\circ$ |
| $\angle$ (C42-B1-N2)  | 111.6(1) $^\circ$ |
| $\angle$ (C43-B1-N2)  | 105.6(1) $^\circ$ |
| $\angle$ (C43-B1-C42) | 112.9(1) $^\circ$ |
| $\angle$ (C43-B1-C41) | 115.7(1) $^\circ$ |
| $\angle$ (C42-B1-C41) | 113.9(1) $^\circ$ |

**Table S5.** Selected bond lengths of **EH3** in the solid state.

| Bond Lengths / $\text{\AA}$ |          |         |          |         |          |         |          |
|-----------------------------|----------|---------|----------|---------|----------|---------|----------|
| B1-N2                       | 1.622(2) | C8-C13  | 1.419(2) | C19-C20 | 1.377(2) | C31-C36 | 1.420(2) |
| B1-C41                      | 1.603(2) | C9-C10  | 1.373(2) | C20-C21 | 1.391(2) | C32-C33 | 1.372(2) |
| B1-C42                      | 1.624(2) | C10-C11 | 1.390(2) | C21-C22 | 1.372(2) | C33-C34 | 1.393(2) |
| B1-C43                      | 1.629(2) | C12-C13 | 1.411(2) | C23-C24 | 1.456(2) | C34-C35 | 1.381(2) |
| N2-C3                       | 1.350(2) | C13-C14 | 1.457(2) | C24-C25 | 1.457(2) | C35-C36 | 1.412(2) |
| N2-C15                      | 1.356(2) | C14-C15 | 1.426(2) | C24-C37 | 1.391(2) | C36-C37 | 1.462(2) |
| C3-C4                       | 1.364(2) | C15-C16 | 1.485(2) | C25-C26 | 1.411(2) | C37-C38 | 1.463(2) |
| C4-C5                       | 1.409(2) | C16-C17 | 1.423(2) | C26-C27 | 1.376(2) | C38-C39 | 1.419(2) |
| C5-C6                       | 1.434(2) | C16-C41 | 1.403(2) | C27-C28 | 1.394(2) | C39-C40 | 1.377(2) |
| C5-C14                      | 1.419(2) | C17-C18 | 1.455(2) | C28-C29 | 1.372(2) | C40-C41 | 1.402(2) |
| C6-C7                       | 1.345(2) | C17-C38 | 1.422(2) | C29-C30 | 1.409(2) |         |          |
| C7-C8                       | 1.434(2) | C18-C19 | 1.407(2) | C30-C31 | 1.456(2) |         |          |
| C8-C9                       | 1.419(2) | C18-C23 | 1.417(2) | C31-C32 | 1.407(2) |         |          |

**Table S6.** Crystallographic data for single crystal X-ray analysis of **EH3**.

|                                                                |                                                    |
|----------------------------------------------------------------|----------------------------------------------------|
| Empirical formula                                              | C <sub>41</sub> H <sub>28</sub> BN                 |
| Formula weight (g·mol <sup>-1</sup> )                          | 545.45                                             |
| Temperature (K)                                                | 99.98(10)                                          |
| Radiation, $\lambda$ (Å)                                       | CuK $\alpha$ , 1.54184                             |
| Crystal system                                                 | monoclinic                                         |
| Space group                                                    | <i>P2<sub>1</sub>/n</i>                            |
| <i>Unit cell dimensions</i>                                    |                                                    |
| <i>a</i> (Å)                                                   | 9.14170(10)                                        |
| <i>b</i> (Å)                                                   | 12.94930(10)                                       |
| <i>c</i> (Å)                                                   | 23.7698(2)                                         |
| $\alpha$ (°)                                                   | 90                                                 |
| $\beta$ (°)                                                    | 97.3480(10)                                        |
| $\gamma$ (°)                                                   | 90                                                 |
| Volume (Å <sup>3</sup> )                                       | 2790.73(4)                                         |
| <i>Z</i>                                                       | 4                                                  |
| Calculated density (Mg·m <sup>-3</sup> )                       | 1.298                                              |
| Absorption coefficient (mm <sup>-1</sup> )                     | 0.562                                              |
| <i>F</i> (000)                                                 | 1144                                               |
| Theta range for collection                                     | 3.750 to 73.725°                                   |
| Reflections collected                                          | 24511                                              |
| Independent reflections                                        | 5581                                               |
| Minimum/maximum transmission                                   | 0.405/1.000                                        |
| Refinement method                                              | Full-matrix least-squares on <i>F</i> <sup>2</sup> |
| Data / parameters / restraints                                 | 5581 / 390 / 0                                     |
| Goodness-of-fit on <i>F</i> <sup>2</sup>                       | 1.045                                              |
| Final R indices [ <i>I</i> > 2 $\sigma$ ( <i>I</i> )]          | R <sub>1</sub> = 0.0407, wR <sub>2</sub> = 0.1043  |
| R indices (all data)                                           | R <sub>1</sub> = 0.0423, wR <sub>2</sub> = 0.1055  |
| Maximum/minimum residual electron density (e·Å <sup>-3</sup> ) | 0.357 / -0.231                                     |



## 5. Optical and electrochemical properties

### Absorption in the solid state

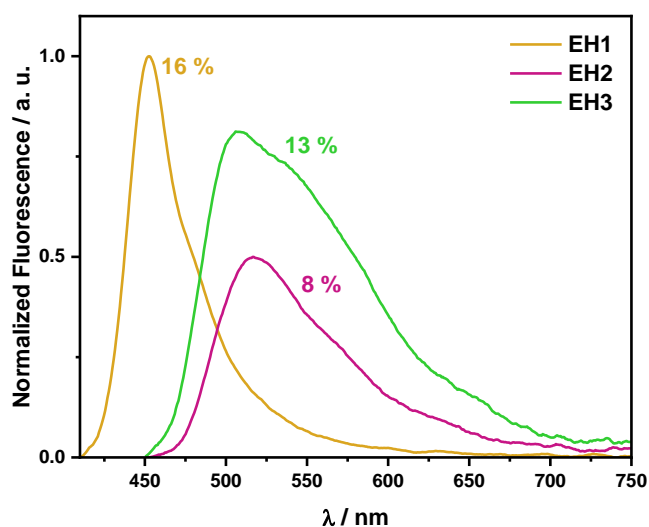

**Figure S51.** Emission spectra of **EH1** (yellow line,  $\lambda_{em} = 452$  nm), **EH2** (magenta line,  $\lambda_{em} = 522$  nm) and **EH3** (green line,  $\lambda_{em} = 507$  nm) of amorphous powders upon excitation at  $\lambda_{ex}$  of 380 nm for **EH1** and 400 nm for **EH2** and **EH3**. The spectra are scaled to their absolute quantum yields determined by an integrating sphere setup.

### Cyclic voltammetry and differential pulse voltammetry

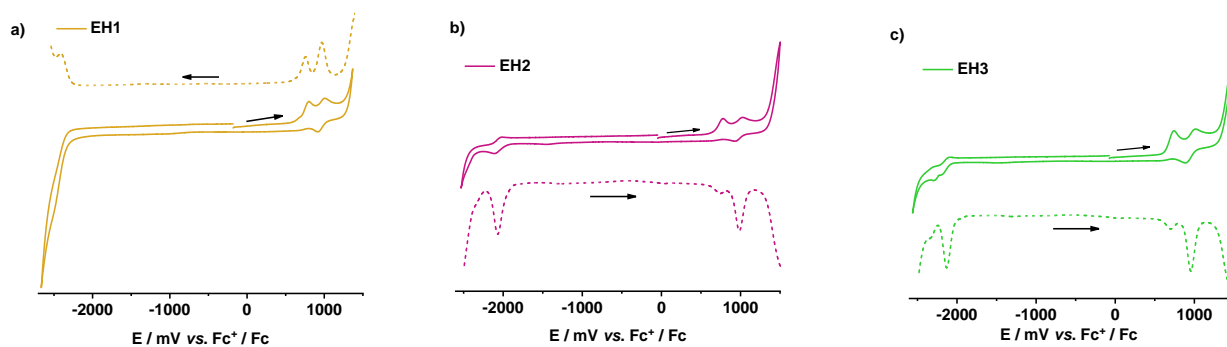

**Figure S52.** Cyclic (solid lines) and differential pulse (dashed lines) voltammograms of a) **EH1**, b) **EH2**, and c) **EH3** in  $\text{CH}_2\text{Cl}_2$  with  $\text{Bu}_4\text{NPF}_6$  as a supporting electrolyte and calibrated versus the ferrocenium/ferrocene ( $\text{Fc}^+/\text{Fc}$ ) redox couple as an internal standard.

The HOMO / LUMO energy levels of **EH1-3** were calculated from CV measurements with the energy level of Fc<sup>+</sup>/Fc set to -4.8 eV vs. vacuum:

$$E_{\text{HOMO}} = -e \cdot E^{\text{ox}} - 4.8 \text{ eV} \quad (\text{Eq. 1})$$

$$E_{\text{LUMO}} = -e \cdot E^{\text{red}} - 4.8 \text{ eV} \quad (\text{Eq. 2})$$

HOMO-LUMO band gaps were then calculated according to eq. 3 and are summarized in the table below.

$$E_{\text{g}} = E^{\text{ox}} - E^{\text{red}} \quad (\text{Eq. 3})$$

**Table S7.** Electrochemical properties of extended helicenes.<sup>[a]</sup>

| Compound   | $E_{1/2}^{\text{red1}} / \text{V}$ | $E_{1/2}^{\text{red2}} / \text{V}$ | $E_{1/2}^{\text{ox1}} / \text{V}$ | $E_{1/2}^{\text{ox2}} / \text{V}$ | $E_{\text{HOMO}}^{[c]} / \text{eV}$ | $E_{\text{LUMO}}^{[c]} / \text{eV}$ | $E_{\text{g}}^{[c]} / \text{eV}$ |
|------------|------------------------------------|------------------------------------|-----------------------------------|-----------------------------------|-------------------------------------|-------------------------------------|----------------------------------|
| <b>EH1</b> | (-2.41)                            | –                                  | +0.80 <sup>[b]</sup><br>(+0.76)   | +0.96<br>(+0.98)                  | -5.56                               | -2.39                               | 3.17                             |
| <b>EH2</b> | -2.06<br>(-2.07)                   | –                                  | +0.78 <sup>[b]</sup><br>(+0.74)   | +0.98<br>(+0.98)                  | -5.54                               | -2.73                               | 2.81                             |
| <b>EH3</b> | -2.15<br>(-2.12)                   | -2.30 <sup>[b]</sup><br>(-2.32)    | +0.74 <sup>[b]</sup><br>(+0.72)   | +0.95<br>(+0.97)                  | -5.52                               | -2.68                               | 2.84                             |

[a] Redox potentials were measured in dry CH<sub>2</sub>Cl<sub>2</sub> (*c* ~ 10<sup>-4</sup> – 10<sup>-5</sup> M) at a scan rate of 100 mV s<sup>-1</sup> and with 50% of iR compensation; supporting electrolyte Bu<sub>4</sub>NPF<sub>6</sub> (*c* = 0.1 M). Measurements were calibrated vs. the ferrocenium/ferrocene (Fc<sup>+</sup>/Fc) redox couple as an internal standard. The values in parentheses correspond to DPV measurements. [b] Peak potential. [c] HOMO / LUMO levels and a band gap were calculated according to eq. 1-3.

## 6. Resolution of enantiomers

### Analytical HPLC

Chiral resolution of racemates of **EH2** and **EH3** into their corresponding enantiomers was performed by HPLC using columns with a chiral stationary phase from Dr. Maisch GmbH (ReproSil Chiral-MIF). Samples of helicenes (**rac**)-**EH2** and (**rac**)-**EH3** were dissolved in *n*-hexane/CH<sub>2</sub>Cl<sub>2</sub> (9:1), injected on a column with a chiral stationary phase (ReproSil Chiral-MIF, 250 × 4.6 mm) and eluted with *n*-hexane/CH<sub>2</sub>Cl<sub>2</sub> (87:13) at room temperature with a flow rate of 1 mL min<sup>-1</sup>.

**Table S8.** Parameters for chiral resolution of enantiomers by analytical HPLC

| Compound                   | Column <sup>[a]</sup> | Eluent: <sup>n</sup> Hex/CH <sub>2</sub> Cl <sub>2</sub> | First fraction | Second fraction |
|----------------------------|-----------------------|----------------------------------------------------------|----------------|-----------------|
| ( <b>rac</b> )- <b>EH2</b> | ReproSil Chiral-MIF   | 87/13                                                    | <i>M</i>       | <i>P</i>        |
| ( <b>rac</b> )- <b>EH3</b> | ReproSil Chiral-MIF   | 87/13                                                    | <i>M</i>       | <i>P</i>        |

[a] Dr-Maisch GmbH, ReproSil Chiral-MIF (250 × 4.6 mm). Sample injection: 10 μL of each racemate (**rac**)-**EH2** and (**rac**)-**EH3** in <sup>n</sup>hexane/CH<sub>2</sub>Cl<sub>2</sub> (9/1, ~0.5 mg / 1 mL). Separation conditions: eluent, *n*-hexane/CH<sub>2</sub>Cl<sub>2</sub>, flow rate 1 mL/min, 20 °C.

### Semipreparative HPLC

Samples of helicenes (**rac**)-**EH2** and (**rac**)-**EH3** were dissolved in *n*-hexane/CH<sub>2</sub>Cl<sub>2</sub> (9:1), injected on a column (0.5 mg mL<sup>-1</sup>) with a chiral stationary phase (ReproSil Chiral-MIF, 250 × 10 mm) and eluted with *n*-hexane/CH<sub>2</sub>Cl<sub>2</sub> (9:1) at room temperature with a flow rate of 20 mL min<sup>-1</sup>.

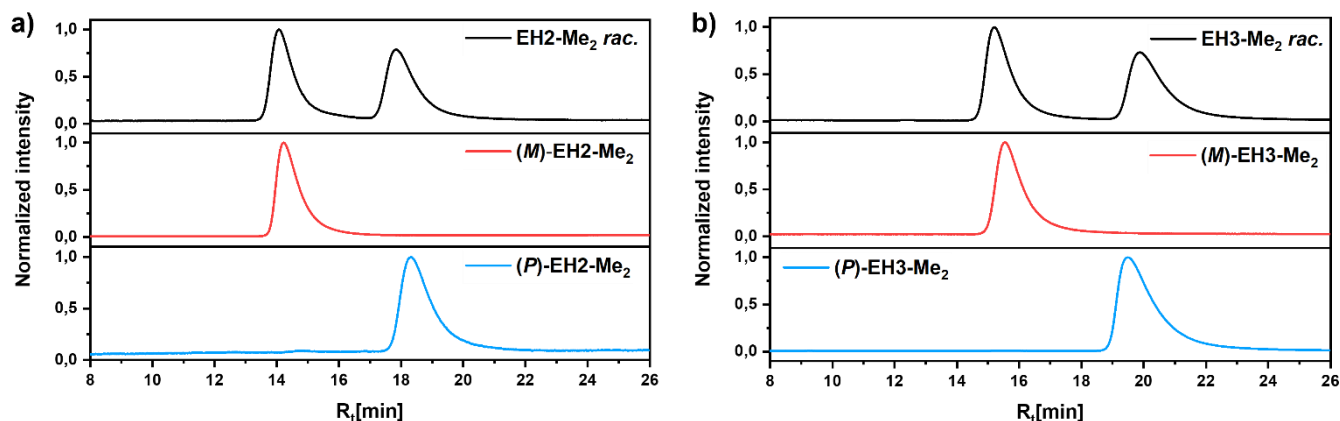

Figure S53. Chromatograms of a) EH2 and b) EH3: racemates (top) and (*M*)- (middle), and (*P*)-enantiomers (bottom).

## 7. Interconversion Barrier

The baseline separation of the *M*- and the *P*-enantiomers of **EH2** and **EH3** allowed the determination of the activation parameters for racemization by time-dependent HPLC measurements. To this end, enantiopure samples of (*M*)-**EH2** (1.00 mg) and (*M*)-**EH3** (1.00 mg) were each dissolved in 1,2-dichlorobenzene (2.0 mL). Afterwards, the solutions were heated at 65 °C (**EH2**) and 170 °C (**EH3**). Aliquots (50  $\mu$ L) were periodically removed from the solutions and analyzed by HPLC on a chiral stationary phase (ReproSil Chiral-MIF) at room temperature to determine the enantiomeric ratio. Our studies showed that the compounds were configurationally stable at room temperature. Thus, the racemization process during the resolution by HPLC can be neglected.

*P-M* isomerization is a reversible unimolecular reaction and follows first-order kinetics:

$$v = \frac{d(A)}{A_0} = kdt, \quad (\text{Eq. 4})$$

where, *A* denotes the concentration of the enantiomer which is present in excess and *A*<sub>0</sub> is the initial concentration thereof. *k* denotes the reaction rate constant. Integration of the first-order rate law yields:

$$\ln \frac{A}{A_0} = -kt, \quad (\text{Eq. 5})$$

Thus, the rate constant *k* at a given temperature can be determined from the exponential decay of the *A/A*<sub>0</sub> value over time:

$$\frac{A}{A_0} = e^{-kt}, \quad (\text{Eq. 6})$$

Half-life *t*<sub>1/2</sub> can be calculated from the equation:

$$t_{1/2} = \frac{\ln(2)}{k}, \quad (\text{Eq. 7})$$

The free activation enthalpy of racemization is determined from Eyring equation:

$$\Delta G^\ddagger = -RT \ln \frac{hk}{\sigma k_B T}, \quad (\text{Eq. 8})$$

Where *R*, *T*, *h*, *k*, *k*<sub>B</sub> are gas constant, absolute temperature, Planck's constant, rate constant and Boltzmann constant, respectively. Parameter  $\sigma$  was assumed as 0.5, as the probability of conversion to *P*- or *M*- enantiomer is equal.

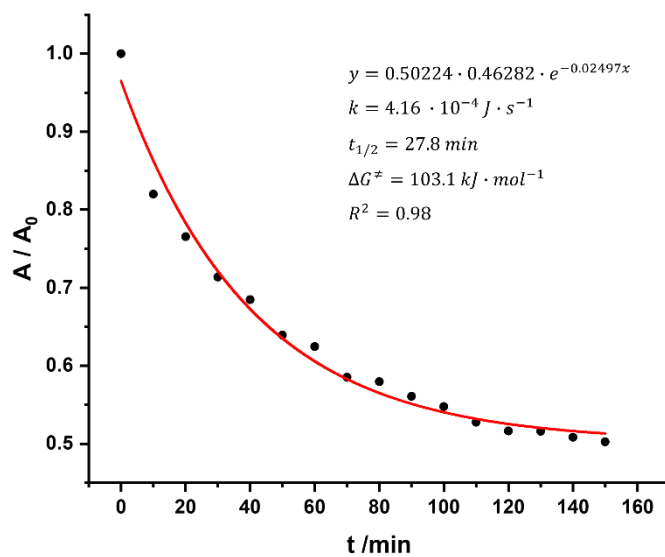

Figure S54. Exponential decay of the  $A/A_0$  value for (*M*)-EH2 at 65 °C in 1,2-dichlorobenzene over time.

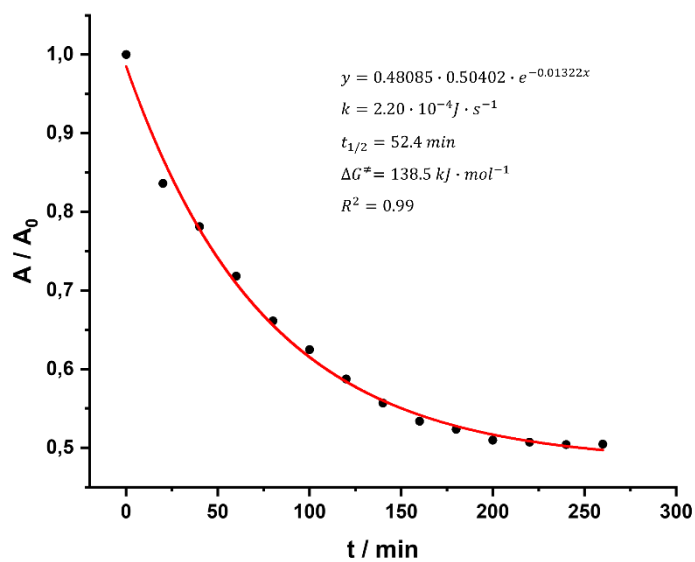

Figure S55. Exponential decay of the  $A/A_0$  value for (*M*)-EH3 at 170 °C in 1,2-dichlorobenzene over time.

## 8. Chiroptical properties

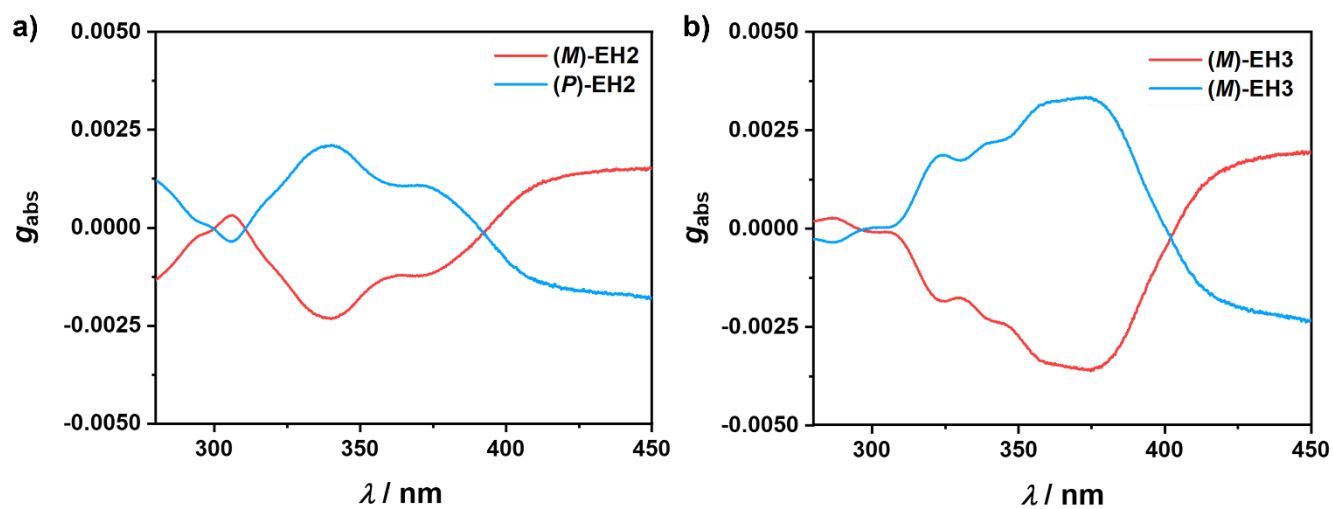

Figure S56. Absorption dissymmetry factors ( $g_{abs}$ ) of a) EH2 and b) EH3.

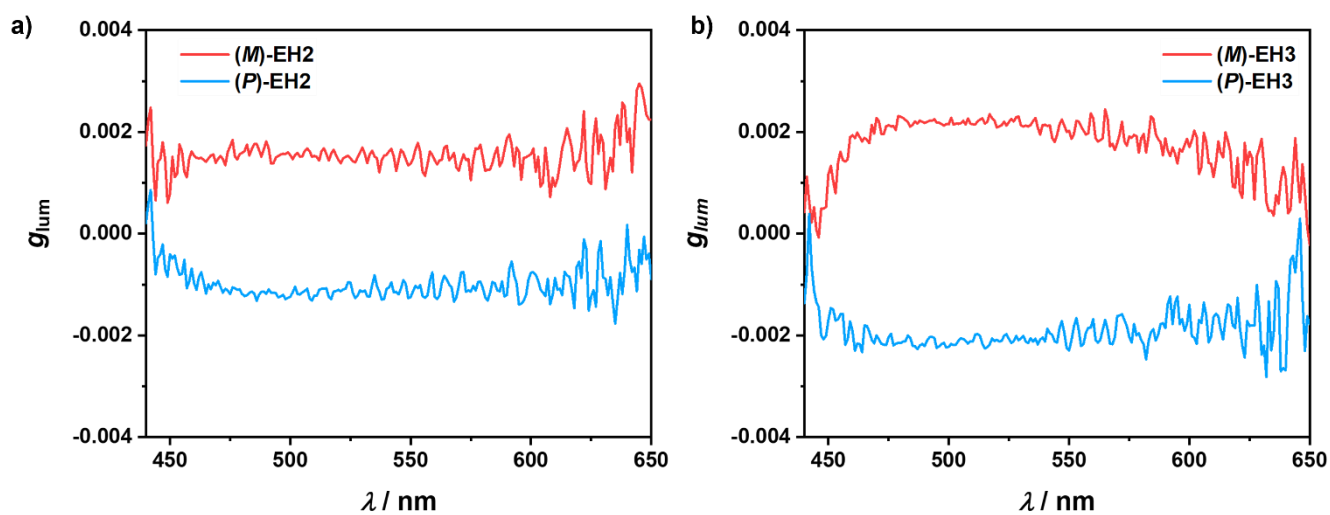

Figure S57. Luminescence dissymmetry factors ( $g_{lum}$ ) of a) EH2 and b) EH3.

## 9. Computations

DFT calculations were performed using the Gaussian 16 program package<sup>[S9]</sup> with B3LYP<sup>[S10]</sup> as a functional and def2-TZVP<sup>[S11]</sup> as a basis set with Grimme's D3(BJ) dispersion correction.<sup>[S12]</sup> CH<sub>2</sub>Cl<sub>2</sub> was used as a solvent for calculations (PCM model). The structures were geometry optimized followed by frequency calculations on the optimized structures, which confirmed the presence of minima (no imaginary frequencies).

Time-dependent (TD)-DFT calculations were carried out on the optimized structures employing a hybrid exchange-correlation functional using the Coulomb-attenuating method (CAM-B3LYP)<sup>[S13]</sup> with Grimme's D3(BJ) dispersion correction and def2-TZVP as a basis set. CH<sub>2</sub>Cl<sub>2</sub> was used as a solvent for calculations (PCM model). The most stable conformations of **EH1-EH3** were considered for calculations. The excited state energies as well as the corresponding oscillator strengths (*f*) are listed in Tables S10-S12. The UV/Vis and CD spectra were simulated using the GaussView 5<sup>[S14]</sup> visualization software package. The half-widths of 1600 cm<sup>-1</sup> were assumed for a proper simulation of the absorption and CD spectra.

The *g*<sub>abs</sub> and *g*<sub>lum</sub> values were calculated following the approach published by Kubo *et al.*<sup>[S15]</sup> The S<sub>0</sub> and S<sub>1</sub> geometries were optimized using hybrid meta-GGA M06-2X functional<sup>[S16]</sup> and def2-SVP<sup>[S11]</sup> as a basis set. The presence of the minima was confirmed by frequency calculations on the optimized structures. The electric and magnetic transition dipole moments were visualized using VMD software.<sup>[S17]</sup>

The *P-M* interconversion processes were studied using B3LYP<sup>[S10]</sup> as a functional and def2-SVP<sup>[S11]</sup> as a basis set with Grimme's D3(BJ) dispersion correction.<sup>[S12]</sup> CH<sub>2</sub>Cl<sub>2</sub> was used as a solvent for calculations (PCM model). The character of the obtained structures has been verified by vibrational frequency analysis (no imaginary frequencies for minima and one imaginary frequency for transition states).

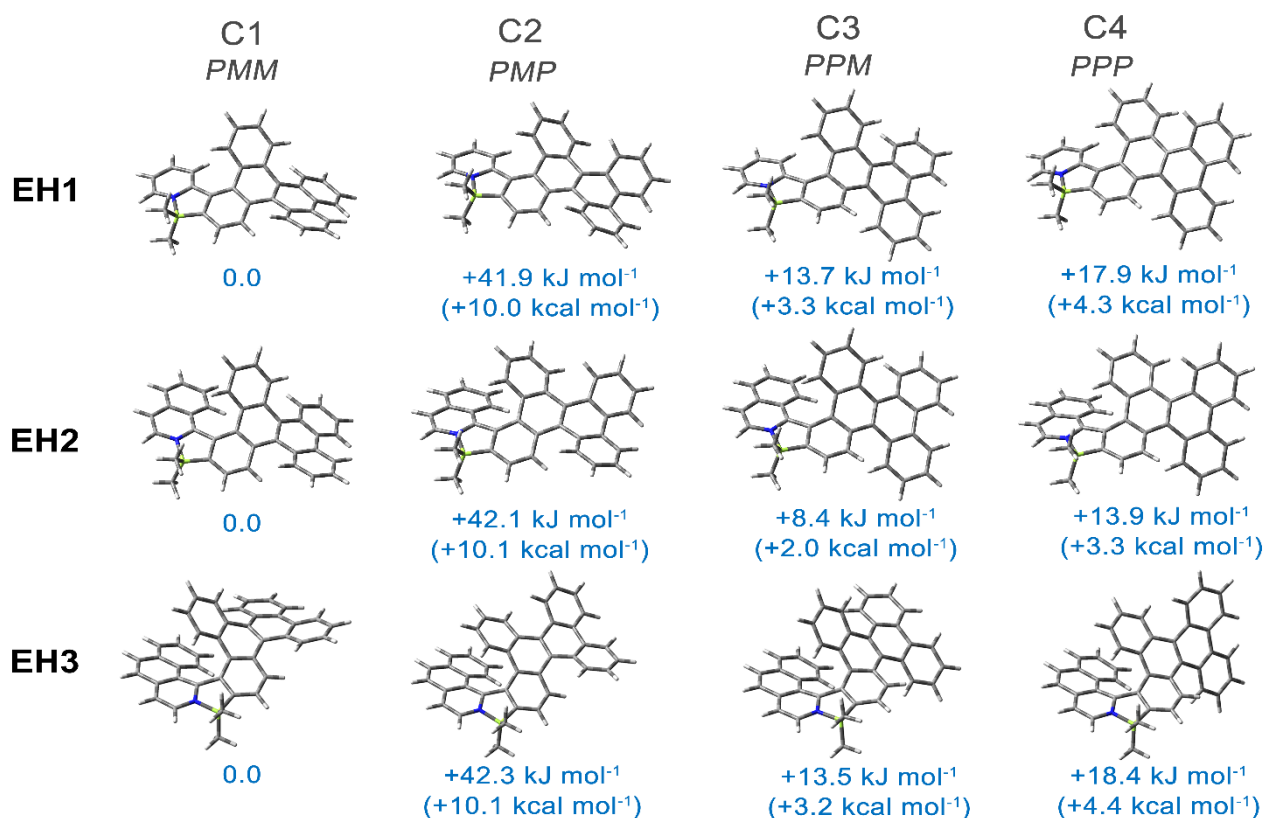

**Figure S58.** Structures of C1-C4 conformations of EH1-EH3 optimized at the B3LYP-D3(BJ)/def2-SVP (solvent CH<sub>2</sub>Cl<sub>2</sub>, PCM model) level of theory and their relative Gibbs free energies.

**Table S9.** Computed relative Gibbs free energies of C1-C4 conformations of EH1-EH3.<sup>[a]</sup>

| Method                                                                 | Compound | C1  | C2    | C3    | C4    |
|------------------------------------------------------------------------|----------|-----|-------|-------|-------|
| B3LYP-D3(BJ)/def2SVP<br>(CH <sub>2</sub> Cl <sub>2</sub> , PCM model)  | EH1      | 0.0 | +41.9 | +13.7 | +17.9 |
|                                                                        | EH2      | 0.0 | +42.1 | +8.4  | +13.9 |
|                                                                        | EH3      | 0.0 | +42.3 | +13.5 | +18.4 |
| B3LYP-D3(BJ)/def2TZVP<br>(CH <sub>2</sub> Cl <sub>2</sub> , PCM model) | EH1      | 0.0 | +42.8 | +13.8 | +18.3 |
|                                                                        | EH2      | 0.0 | +43.4 | +8.3  | +14.3 |
|                                                                        | EH3      | 0.0 | +42.9 | +13.3 | +17.5 |

[a] In kJ mol<sup>-1</sup>.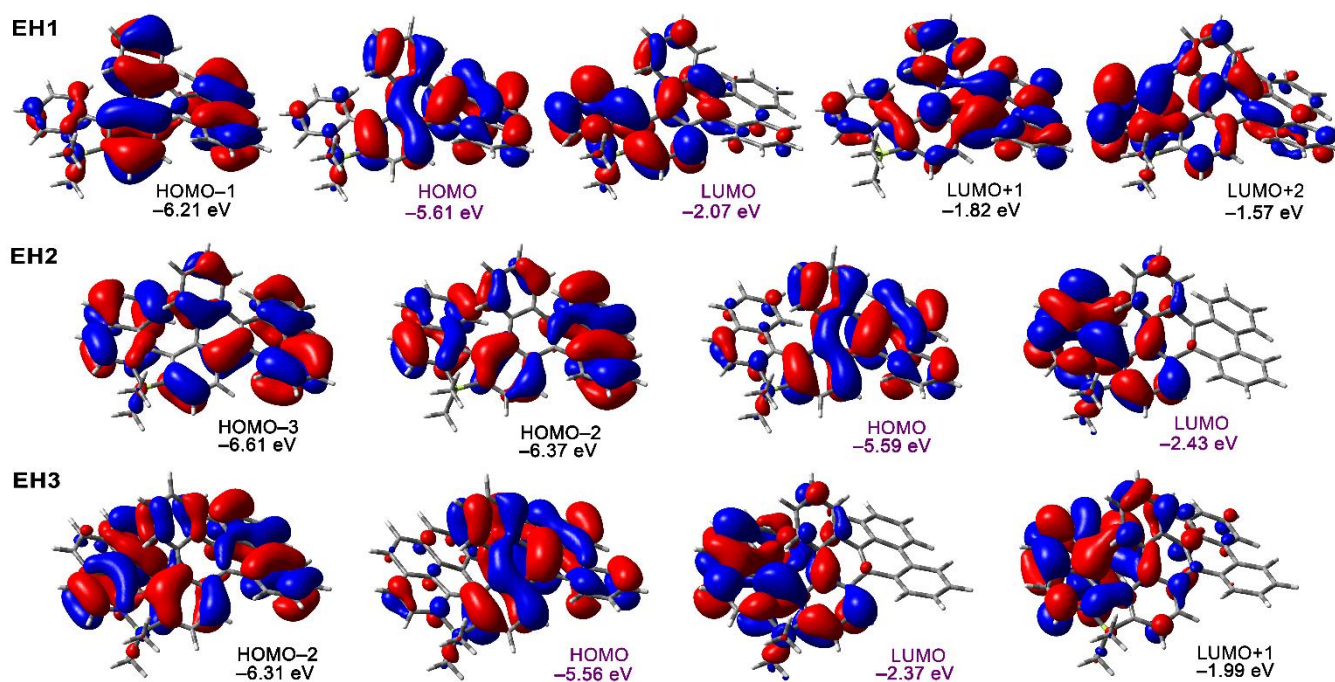**Figure S59.** Contour plots of selected Kohn-Sham orbitals (isovalue=0.02 a.u.) of EH1-EH3 calculated at the B3LYP-D3(BJ)/def2-TZVP (solvent CH<sub>2</sub>Cl<sub>2</sub>, PCM model) level of theory.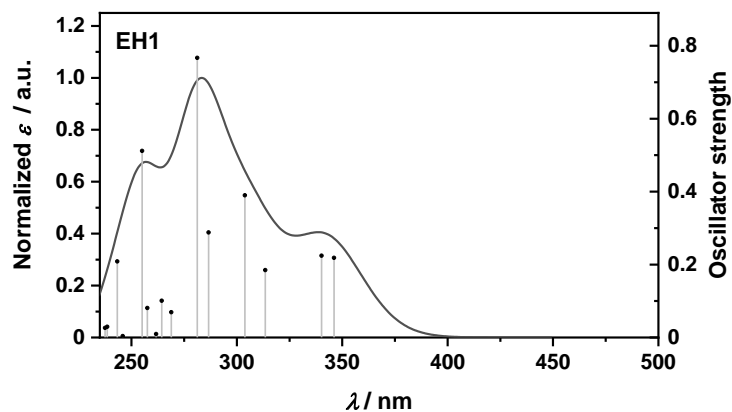**Figure S60.** The simulated UV/Vis absorption spectra of EH1 at the CAM-B3LYP-D3(BJ)/def2-TZVP (solvent CH<sub>2</sub>Cl<sub>2</sub>) level of theory.

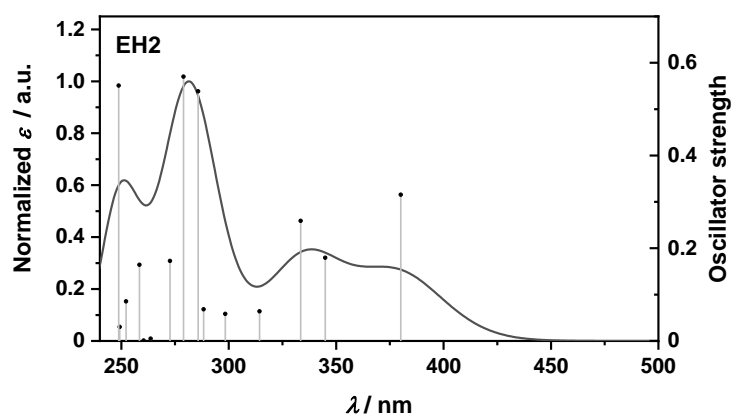

Figure S61. The simulated UV/Vis absorption spectra of EH2 at the CAM-B3LYP-D3(BJ)/def2-TZVP (solvent CH<sub>2</sub>Cl<sub>2</sub>) level of theory.

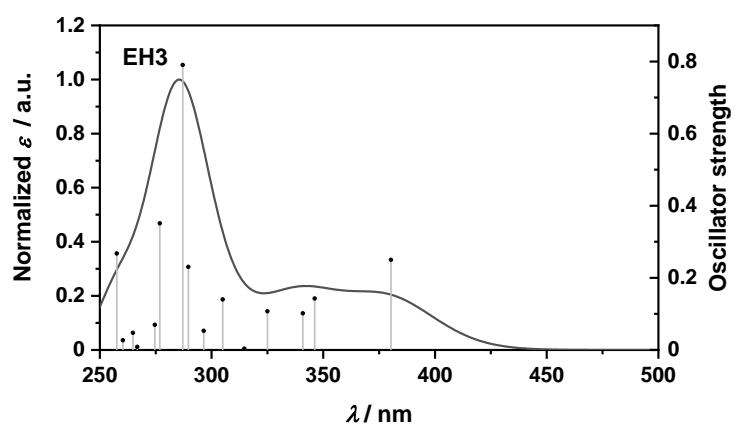

Figure S62. The simulated UV/Vis absorption spectra of EH3 at the CAM-B3LYP-D3(BJ)/def2-TZVP (solvent CH<sub>2</sub>Cl<sub>2</sub>) level of theory.

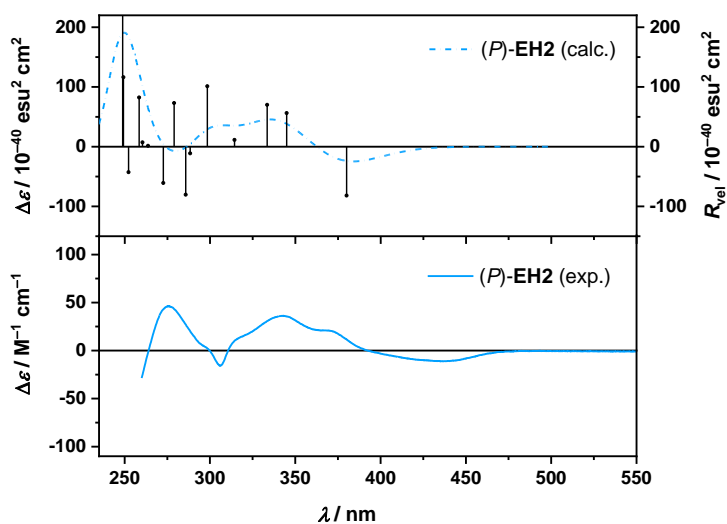

Figure S63. The simulated (dash-dotted line; CAM-B3LYP-D3(BJ)/def2-TZVP, CH<sub>2</sub>Cl<sub>2</sub>, PCM model) and experimental (solid line; CH<sub>2</sub>Cl<sub>2</sub>;  $c = 3.7 \times 10^{-5}$  M) ECD spectra of (P)-EH2.



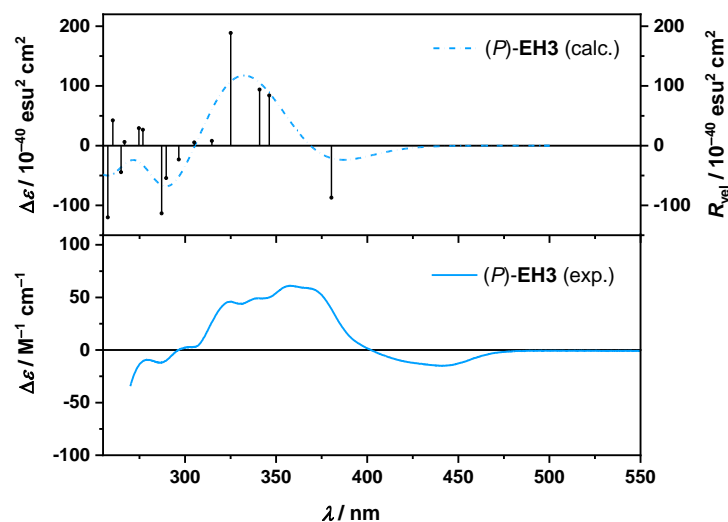

**Figure S64.** The simulated (dash-dotted line; CAM-B3LYP-D3(BJ)/def2-TZVP, CH<sub>2</sub>Cl<sub>2</sub>, PCM model) and experimental (solid line; CH<sub>2</sub>Cl<sub>2</sub>;  $c = 2.7 \times 10^{-5}$  M) ECD spectra of (*P*)-EH3.

**Table S10.** TD-DFT-calculated UV/Vis absorption data for (*P*)-EH1 at the CAM-B3LYP-D3(BJ)/def2-TZVP (solvent CH<sub>2</sub>Cl<sub>2</sub>) level.

|                | Calcd. $\lambda$ [nm] | Oscillator strength ( $f$ ) | Composition      | Coefficient | Contribution |
|----------------|-----------------------|-----------------------------|------------------|-------------|--------------|
| 1              | 346.11                | 0.2185                      | HOMO-1 -> LUMO+1 | -0.19932    | 8%           |
|                |                       |                             | HOMO -> LUMO     | 0.61424     | 75%          |
|                |                       |                             | HOMO -> LUMO+2   | -0.15854    | 5%           |
| 2              | 340.2                 | 0.2244                      | HOMO-1 -> LUMO   | 0.14352     | 4%           |
|                |                       |                             | HOMO -> LUMO+1   | 0.6544      | 86%          |
| 3              | 313.51                | 0.1847                      | HOMO-3 -> LUMO   | 0.14195     | 4%           |
|                |                       |                             | HOMO-2 -> LUMO   | -0.16464    | 5%           |
|                |                       |                             | HOMO-2 -> LUMO+1 | -0.18835    | 7%           |
|                |                       |                             | HOMO-1 -> LUMO   | 0.35533     | 25%          |
|                |                       |                             | HOMO-1 -> LUMO+1 | -0.20283    | 8%           |
|                |                       |                             | HOMO -> LUMO     | -0.13939    | 4%           |
|                |                       |                             | HOMO -> LUMO+1   | -0.12374    | 3%           |
|                |                       |                             | HOMO -> LUMO+2   | -0.29333    | 17%          |
| HOMO -> LUMO+3 | 0.29765               | 18%                         |                  |             |              |
| 4              | 303.82                | 0.3899                      | HOMO-2 -> LUMO   | 0.35344     | 25%          |
|                |                       |                             | HOMO-2 -> LUMO+1 | -0.10472    | 2%           |
|                |                       |                             | HOMO-1 -> LUMO   | -0.34379    | 24%          |
|                |                       |                             | HOMO-1 -> LUMO+1 | -0.16259    | 5%           |
|                |                       |                             | HOMO -> LUMO+3   | 0.38828     | 30%          |
| 5              | 286.57                | 0.2881                      | HOMO-3 -> LUMO   | -0.16807    | 6%           |
|                |                       |                             | HOMO-3 -> LUMO+2 | -0.12355    | 3%           |
|                |                       |                             | HOMO-2 -> LUMO+1 | -0.19745    | 8%           |

|    |        |        |                  |          |     |
|----|--------|--------|------------------|----------|-----|
|    |        |        | HOMO-1 -> LUMO   | 0.31046  | 19% |
|    |        |        | HOMO-1 -> LUMO+1 | 0.10229  | 2%  |
|    |        |        | HOMO-1 -> LUMO+2 | -0.14484 | 4%  |
|    |        |        | HOMO -> LUMO     | 0.10529  | 2%  |
|    |        |        | HOMO -> LUMO+2   | 0.39421  | 31% |
|    |        |        | HOMO -> LUMO+3   | 0.13741  | 4%  |
|    |        |        | HOMO -> LUMO+4   | -0.18077 | 7%  |
| 6  | 281.21 | 0.7667 | HOMO-3 -> LUMO   | 0.10871  | 2%  |
|    |        |        | HOMO-2 -> LUMO   | -0.14723 | 4%  |
|    |        |        | HOMO-1 -> LUMO   | -0.1058  | 2%  |
|    |        |        | HOMO-1 -> LUMO+1 | 0.54297  | 59% |
|    |        |        | HOMO -> LUMO     | 0.15385  | 5%  |
|    |        |        | HOMO -> LUMO+2   | -0.16032 | 5%  |
|    |        |        | HOMO -> LUMO+3   | 0.25349  | 13% |
| 7  | 268.9  | 0.0693 | HOMO-3 -> LUMO+2 | -0.10813 | 2%  |
|    |        |        | HOMO-2 -> LUMO+1 | 0.12937  | 3%  |
|    |        |        | HOMO-2 -> LUMO+2 | 0.16175  | 5%  |
|    |        |        | HOMO-1 -> LUMO+2 | -0.12071 | 3%  |
|    |        |        | HOMO -> LUMO+2   | 0.15147  | 5%  |
|    |        |        | HOMO -> LUMO+3   | 0.1342   | 4%  |
|    |        |        | HOMO -> LUMO+4   | 0.54942  | 60% |
| 8  | 264.39 | 0.1007 | HOMO-3 -> LUMO   | -0.30477 | 19% |
|    |        |        | HOMO-3 -> LUMO+1 | -0.19398 | 8%  |
|    |        |        | HOMO-2 -> LUMO+1 | 0.38278  | 29% |
|    |        |        | HOMO-2 -> LUMO+2 | -0.11126 | 2%  |
|    |        |        | HOMO-1 -> LUMO   | 0.12843  | 3%  |
|    |        |        | HOMO-1 -> LUMO+2 | 0.16168  | 5%  |
|    |        |        | HOMO-1 -> LUMO+3 | -0.11257 | 3%  |
|    |        |        | HOMO -> LUMO     | -0.11761 | 3%  |
|    |        |        | HOMO -> LUMO+2   | -0.1008  | 2%  |
|    |        |        | HOMO -> LUMO+3   | 0.14528  | 4%  |
| 9  | 261.69 | 0.0094 | HOMO-3 -> LUMO+1 | -0.11529 | 3%  |
|    |        |        | HOMO-2 -> LUMO   | 0.33268  | 22% |
|    |        |        | HOMO-2 -> LUMO+1 | -0.31188 | 19% |
|    |        |        | HOMO-1 -> LUMO+3 | -0.11607 | 3%  |
|    |        |        | HOMO -> LUMO+2   | -0.18673 | 7%  |
|    |        |        | HOMO -> LUMO+3   | -0.2822  | 16% |
|    |        |        | HOMO -> LUMO+4   | 0.27432  | 15% |
| 10 | 257.53 | 0.0809 | HOMO-4 -> LUMO+1 | -0.10069 | 2%  |

|    |        |        |                  |          |     |
|----|--------|--------|------------------|----------|-----|
|    |        |        | HOMO-3 -> LUMO   | -0.11644 | 3%  |
|    |        |        | HOMO-2 -> LUMO+2 | 0.36519  | 27% |
|    |        |        | HOMO-2 -> LUMO+3 | -0.1187  | 3%  |
|    |        |        | HOMO-1 -> LUMO+2 | -0.19436 | 8%  |
|    |        |        | HOMO-1 -> LUMO+3 | -0.2589  | 13% |
|    |        |        | HOMO -> LUMO     | -0.10775 | 2%  |
|    |        |        | HOMO -> LUMO+2   | -0.15905 | 5%  |
|    |        |        | HOMO -> LUMO+4   | -0.11251 | 3%  |
|    |        |        | HOMO -> LUMO+5   | -0.27878 | 16% |
| 11 | 255.07 | 0.5116 | HOMO-3 -> LUMO   | -0.1705  | 6%  |
|    |        |        | HOMO-3 -> LUMO+1 | 0.17053  | 6%  |
|    |        |        | HOMO-2 -> LUMO   | 0.12987  | 3%  |
|    |        |        | HOMO-2 -> LUMO+3 | 0.29375  | 17% |
|    |        |        | HOMO-1 -> LUMO+1 | 0.12371  | 3%  |
|    |        |        | HOMO-1 -> LUMO+2 | -0.28359 | 16% |
|    |        |        | HOMO-1 -> LUMO+3 | 0.30328  | 18% |
|    |        |        | HOMO -> LUMO+1   | -0.1128  | 3%  |
|    |        |        | HOMO -> LUMO+2   | -0.23371 | 11% |
|    |        |        | HOMO -> LUMO+4   | -0.11687 | 3%  |
| 12 | 245.87 | 0.0039 | HOMO-6 -> LUMO+3 | 0.10554  | 2%  |
|    |        |        | HOMO-4 -> LUMO+3 | -0.14088 | 4%  |
|    |        |        | HOMO-3 -> LUMO   | 0.11999  | 3%  |
|    |        |        | HOMO-3 -> LUMO+3 | 0.1489   | 4%  |
|    |        |        | HOMO-2 -> LUMO+1 | 0.12951  | 3%  |
|    |        |        | HOMO-2 -> LUMO+2 | -0.10947 | 2%  |
|    |        |        | HOMO-2 -> LUMO+4 | 0.25769  | 13% |
|    |        |        | HOMO-1 -> LUMO+4 | 0.40068  | 32% |
| 13 | 243.25 | 0.2086 | HOMO-3 -> LUMO   | -0.29589 | 18% |
|    |        |        | HOMO-3 -> LUMO+1 | 0.46629  | 43% |
|    |        |        | HOMO-3 -> LUMO+2 | 0.11207  | 3%  |
|    |        |        | HOMO-2 -> LUMO+1 | -0.14104 | 4%  |
|    |        |        | HOMO-2 -> LUMO+3 | -0.15111 | 5%  |
|    |        |        | HOMO-1 -> LUMO+2 | 0.16364  | 5%  |
|    |        |        | HOMO-1 -> LUMO+3 | -0.12774 | 3%  |
|    |        |        | HOMO -> LUMO+6   | 0.11639  | 3%  |
| 14 | 238.52 | 0.0295 | HOMO-7 -> LUMO   | -0.36547 | 27% |
|    |        |        | HOMO-6 -> LUMO   | 0.37904  | 29% |
|    |        |        | HOMO-1 -> LUMO+2 | 0.21743  | 9%  |
|    |        |        | HOMO-1 -> LUMO+3 | 0.13842  | 4%  |

|    |       |        |                  |          |     |
|----|-------|--------|------------------|----------|-----|
|    |       |        | HOMO -> LUMO+5   | -0.19434 | 8%  |
| 15 | 237.5 | 0.0263 | HOMO-8 -> LUMO   | -0.14748 | 4%  |
|    |       |        | HOMO-7 -> LUMO   | -0.21388 | 9%  |
|    |       |        | HOMO-6 -> LUMO   | 0.24455  | 12% |
|    |       |        | HOMO-4 -> LUMO   | 0.12173  | 3%  |
|    |       |        | HOMO-3 -> LUMO+2 | 0.13834  | 4%  |
|    |       |        | HOMO-1 -> LUMO+2 | -0.21498 | 9%  |
|    |       |        | HOMO-1 -> LUMO+3 | -0.1984  | 8%  |
|    |       |        | HOMO-1 -> LUMO+4 | -0.11903 | 3%  |
|    |       |        | HOMO-1 -> LUMO+5 | -0.10021 | 2%  |
|    |       |        | HOMO -> LUMO+5   | 0.32363  | 21% |
|    |       |        | HOMO -> LUMO+6   | 0.12732  | 3%  |

**Table S11.** TD-DFT-calculated UV/Vis absorption data for (*P*)-**EH2** at the CAM-B3LYP-D3(BJ)/def2-TZVP (solvent CH<sub>2</sub>Cl<sub>2</sub>) level.

|   | Calcd. $\lambda$ [nm] | Oscillator strength ( <i>f</i> ) | Composition      | Coefficient | Contribution |
|---|-----------------------|----------------------------------|------------------|-------------|--------------|
| 1 | 380.05                | 0.3154                           | HOMO-3 -> LUMO   | -0.10528    | 2%           |
|   |                       |                                  | HOMO-2 -> LUMO   | 0.17387     | 6%           |
|   |                       |                                  | HOMO -> LUMO     | 0.63009     | 79%          |
| 2 | 344.92                | 0.1796                           | HOMO-1 -> LUMO   | -0.18781    | 7%           |
|   |                       |                                  | HOMO -> LUMO+1   | 0.64476     | 83%          |
| 3 | 333.47                | 0.2591                           | HOMO-2 -> LUMO   | 0.33845     | 23%          |
|   |                       |                                  | HOMO-1 -> LUMO   | 0.48499     | 47%          |
|   |                       |                                  | HOMO-1 -> LUMO+1 | -0.19979    | 8%           |
|   |                       |                                  | HOMO -> LUMO     | -0.1128     | 3%           |
|   |                       |                                  | HOMO -> LUMO+1   | 0.15545     | 5%           |
|   |                       |                                  | HOMO -> LUMO+2   | 0.17663     | 6%           |
| 4 | 314.35                | 0.0639                           | HOMO-3 -> LUMO   | -0.11774    | 3%           |
|   |                       |                                  | HOMO-2 -> LUMO+1 | 0.18681     | 7%           |
|   |                       |                                  | HOMO-1 -> LUMO   | -0.21081    | 9%           |
|   |                       |                                  | HOMO-1 -> LUMO+1 | -0.3166     | 20%          |
|   |                       |                                  | HOMO -> LUMO     | 0.12881     | 3%           |
|   |                       |                                  | HOMO -> LUMO+2   | 0.35873     | 26%          |
|   |                       |                                  | HOMO -> LUMO+3   | -0.3176     | 20%          |
| 5 | 298.39                | 0.0584                           | HOMO-6 -> LUMO   | 0.13981     | 4%           |
|   |                       |                                  | HOMO-3 -> LUMO   | 0.37737     | 28%          |
|   |                       |                                  | HOMO-3 -> LUMO+1 | 0.11397     | 3%           |
|   |                       |                                  | HOMO-2 -> LUMO   | -0.28155    | 16%          |

|   |        |        |                  |          |     |
|---|--------|--------|------------------|----------|-----|
|   |        |        | HOMO-2 -> LUMO+1 | 0.1247   | 3%  |
|   |        |        | HOMO-1 -> LUMO   | 0.23552  | 11% |
|   |        |        | HOMO -> LUMO+3   | -0.22403 | 10% |
|   |        |        | HOMO -> LUMO+4   | -0.17647 | 6%  |
| 6 | 288.33 | 0.0683 | HOMO-4 -> LUMO   | 0.15968  | 5%  |
|   |        |        | HOMO-3 -> LUMO   | -0.23876 | 11% |
|   |        |        | HOMO-3 -> LUMO+1 | 0.16095  | 5%  |
|   |        |        | HOMO-2 -> LUMO   | 0.22725  | 10% |
|   |        |        | HOMO-2 -> LUMO+1 | 0.15346  | 5%  |
|   |        |        | HOMO-1 -> LUMO+1 | 0.32316  | 21% |
|   |        |        | HOMO -> LUMO     | -0.17516 | 6%  |
|   |        |        | HOMO -> LUMO+3   | -0.26336 | 14% |
|   |        |        | HOMO -> LUMO+4   | -0.21556 | 9%  |
| 7 | 285.75 | 0.5383 | HOMO-5 -> LUMO   | 0.12202  | 3%  |
|   |        |        | HOMO-4 -> LUMO   | 0.38829  | 30% |
|   |        |        | HOMO-3 -> LUMO   | -0.1316  | 3%  |
|   |        |        | HOMO-3 -> LUMO+1 | -0.136   | 4%  |
|   |        |        | HOMO-2 -> LUMO+3 | -0.14053 | 4%  |
|   |        |        | HOMO-1 -> LUMO+1 | -0.32998 | 22% |
|   |        |        | HOMO -> LUMO+2   | -0.29709 | 18% |
| 8 | 278.97 | 0.57   | HOMO-6 -> LUMO   | 0.13627  | 4%  |
|   |        |        | HOMO-3 -> LUMO+1 | -0.10486 | 2%  |
|   |        |        | HOMO-2 -> LUMO+1 | -0.22819 | 10% |
|   |        |        | HOMO-2 -> LUMO+2 | -0.13564 | 4%  |
|   |        |        | HOMO-2 -> LUMO+3 | -0.12181 | 3%  |
|   |        |        | HOMO-1 -> LUMO+1 | 0.22372  | 10% |
|   |        |        | HOMO -> LUMO+2   | 0.17294  | 6%  |
|   |        |        | HOMO -> LUMO+3   | -0.23443 | 11% |
|   |        |        | HOMO -> LUMO+4   | 0.36507  | 27% |
|   |        |        | HOMO -> LUMO+5   | -0.17687 | 6%  |
| 9 | 272.64 | 0.1725 | HOMO-8 -> LUMO   | 0.14549  | 4%  |
|   |        |        | HOMO-4 -> LUMO   | 0.4063   | 33% |
|   |        |        | HOMO-2 -> LUMO   | -0.22119 | 10% |
|   |        |        | HOMO-2 -> LUMO+1 | -0.13052 | 3%  |
|   |        |        | HOMO-2 -> LUMO+2 | 0.17296  | 6%  |
|   |        |        | HOMO-2 -> LUMO+3 | 0.10507  | 2%  |
|   |        |        | HOMO-1 -> LUMO   | 0.15642  | 5%  |
|   |        |        | HOMO-1 -> LUMO+2 | 0.14687  | 4%  |
|   |        |        | HOMO -> LUMO+2   | 0.20309  | 8%  |

|    |        |        |                  |          |     |
|----|--------|--------|------------------|----------|-----|
| 10 | 263.65 | 0.005  | HOMO-2 -> LUMO   | -0.10067 | 2%  |
|    |        |        | HOMO-2 -> LUMO+1 | 0.37488  | 28% |
|    |        |        | HOMO-2 -> LUMO+2 | 0.14296  | 4%  |
|    |        |        | HOMO -> LUMO+2   | -0.10784 | 2%  |
|    |        |        | HOMO -> LUMO+4   | 0.34803  | 24% |
|    |        |        | HOMO -> LUMO+5   | -0.29295 | 17% |
|    |        |        | HOMO -> LUMO+6   | -0.145   | 4%  |
| 11 | 260.39 | 0.0008 | HOMO-6 -> LUMO   | 0.14731  | 4%  |
|    |        |        | HOMO-3 -> LUMO+1 | 0.15857  | 5%  |
|    |        |        | HOMO-2 -> LUMO+1 | 0.28485  | 16% |
|    |        |        | HOMO-2 -> LUMO+2 | -0.11552 | 3%  |
|    |        |        | HOMO-1 -> LUMO+1 | 0.12519  | 3%  |
|    |        |        | HOMO-1 -> LUMO+3 | -0.13893 | 4%  |
|    |        |        | HOMO -> LUMO+2   | 0.24193  | 12% |
|    |        |        | HOMO -> LUMO+3   | 0.29383  | 17% |
|    |        |        | HOMO -> LUMO+4   | 0.12046  | 3%  |
|    |        |        | HOMO -> LUMO+5   | 0.24275  | 12% |
|    |        |        | HOMO -> LUMO+6   | 0.17878  | 6%  |
| 12 | 258.46 | 0.1643 | HOMO-3 -> LUMO+1 | -0.25348 | 13% |
|    |        |        | HOMO-3 -> LUMO+4 | -0.11221 | 3%  |
|    |        |        | HOMO-2 -> LUMO+2 | 0.13702  | 4%  |
|    |        |        | HOMO-2 -> LUMO+3 | -0.22938 | 11% |
|    |        |        | HOMO-1 -> LUMO+1 | 0.11796  | 3%  |
|    |        |        | HOMO-1 -> LUMO+2 | -0.22138 | 10% |
|    |        |        | HOMO-1 -> LUMO+3 | 0.22098  | 10% |
|    |        |        | HOMO-1 -> LUMO+4 | 0.1218   | 3%  |
|    |        |        | HOMO -> LUMO+2   | 0.12172  | 3%  |
|    |        |        | HOMO -> LUMO+5   | 0.29992  | 18% |
|    |        |        | HOMO -> LUMO+6   | -0.10142 | 2%  |
| 13 | 252.24 | 0.0854 | HOMO-9 -> LUMO   | 0.1859   | 7%  |
|    |        |        | HOMO-8 -> LUMO   | -0.10448 | 2%  |
|    |        |        | HOMO-7 -> LUMO   | 0.48563  | 47% |
|    |        |        | HOMO-6 -> LUMO   | -0.20305 | 8%  |
|    |        |        | HOMO-3 -> LUMO   | 0.18785  | 7%  |
|    |        |        | HOMO-2 -> LUMO   | 0.13982  | 4%  |
|    |        |        | HOMO-2 -> LUMO+2 | -0.10122 | 2%  |
|    |        |        | HOMO-1 -> LUMO   | -0.13455 | 4%  |
| 14 | 249.22 | 0.0303 | HOMO-7 -> LUMO   | -0.13849 | 4%  |
|    |        |        | HOMO-6 -> LUMO   | 0.1813   | 7%  |

|    |        |        |                  |          |     |
|----|--------|--------|------------------|----------|-----|
|    |        |        | HOMO-3 -> LUMO   | 0.2263   | 10% |
|    |        |        | HOMO-2 -> LUMO   | 0.19117  | 7%  |
|    |        |        | HOMO-2 -> LUMO+5 | 0.13833  | 4%  |
|    |        |        | HOMO-1 -> LUMO+2 | 0.26622  | 14% |
|    |        |        | HOMO-1 -> LUMO+4 | 0.34764  | 24% |
| 15 | 248.75 | 0.5507 | HOMO-8 -> LUMO   | -0.11313 | 3%  |
|    |        |        | HOMO-7 -> LUMO   | 0.13193  | 3%  |
|    |        |        | HOMO-4 -> LUMO+1 | 0.13835  | 4%  |
|    |        |        | HOMO-3 -> LUMO+1 | 0.2668   | 14% |
|    |        |        | HOMO-2 -> LUMO+1 | -0.12295 | 3%  |
|    |        |        | HOMO-2 -> LUMO+3 | -0.1282  | 3%  |
|    |        |        | HOMO-2 -> LUMO+4 | -0.19358 | 7%  |
|    |        |        | HOMO-1 -> LUMO+2 | -0.23493 | 11% |
|    |        |        | HOMO-1 -> LUMO+3 | 0.21453  | 9%  |
|    |        |        | HOMO -> LUMO+3   | 0.21325  | 9%  |
|    |        |        | HOMO -> LUMO+4   | -0.12196 | 3%  |
|    |        |        | HOMO -> LUMO+5   | -0.22407 | 10% |

**Table S12.** TD-DFT-calculated UV/Vis absorption data for (*P*)-EH3 at the CAM-B3LYP-D3(BJ)/def2-TZVP (solvent CH<sub>2</sub>Cl<sub>2</sub>) level.

|   | Calcd. $\lambda$ [nm] | Oscillator strength ( <i>f</i> ) | Composition      | Coefficient | Contribution |
|---|-----------------------|----------------------------------|------------------|-------------|--------------|
| 1 | 380.31                | 0.2499                           | HOMO-2 -> LUMO   | 0.20077     | 8%           |
|   |                       |                                  | HOMO -> LUMO     | 0.60694     | 74%          |
|   |                       |                                  | HOMO -> LUMO+1   | -0.17224    | 6%           |
| 2 | 346.16                | 0.1425                           | HOMO-1 -> LUMO   | -0.22365    | 10%          |
|   |                       |                                  | HOMO -> LUMO+1   | 0.35106     | 25%          |
|   |                       |                                  | HOMO -> LUMO+2   | 0.51654     | 53%          |
| 3 | 340.88                | 0.1017                           | HOMO-3 -> LUMO   | -0.17708    | 6%           |
|   |                       |                                  | HOMO-2 -> LUMO   | 0.37791     | 29%          |
|   |                       |                                  | HOMO-1 -> LUMO   | -0.32285    | 21%          |
|   |                       |                                  | HOMO-1 -> LUMO+1 | -0.10341    | 2%           |
|   |                       |                                  | HOMO-1 -> LUMO+2 | -0.15802    | 5%           |
|   |                       |                                  | HOMO -> LUMO     | -0.10333    | 2%           |
|   |                       |                                  | HOMO -> LUMO+1   | 0.15787     | 5%           |
|   |                       |                                  | HOMO -> LUMO+2   | -0.30860    | 19%          |
|   |                       |                                  | HOMO -> LUMO+3   | -0.10076    | 2%           |
| 4 | 325.01                | 0.1073                           | HOMO-4 -> LUMO+1 | -0.10778    | 2%           |
|   |                       |                                  | HOMO-3 -> LUMO   | -0.19222    | 7%           |
|   |                       |                                  | HOMO-2 -> LUMO+1 | 0.18635     | 7%           |

|   |        |        |                  |          |     |
|---|--------|--------|------------------|----------|-----|
|   |        |        | HOMO-2 -> LUMO+2 | -0.10058 | 2%  |
|   |        |        | HOMO-1 -> LUMO   | 0.40049  | 32% |
|   |        |        | HOMO-1 -> LUMO+1 | -0.23559 | 11% |
|   |        |        | HOMO -> LUMO     | 0.13522  | 4%  |
|   |        |        | HOMO -> LUMO+1   | 0.33485  | 22% |
| 5 | 314.68 | 0.0034 | HOMO-4 -> LUMO   | 0.10859  | 2%  |
|   |        |        | HOMO-3 -> LUMO   | -0.19367 | 8%  |
|   |        |        | HOMO-3 -> LUMO+2 | 0.13134  | 3%  |
|   |        |        | HOMO-2 -> LUMO   | 0.11445  | 3%  |
|   |        |        | HOMO-2 -> LUMO+1 | 0.16134  | 5%  |
|   |        |        | HOMO-2 -> LUMO+2 | 0.11239  | 3%  |
|   |        |        | HOMO-1 -> LUMO+2 | 0.27215  | 15% |
|   |        |        | HOMO -> LUMO     | -0.15730 | 5%  |
|   |        |        | HOMO -> LUMO+3   | 0.46264  | 43% |
| 6 | 305    | 0.1401 | HOMO-4 -> LUMO   | -0.24253 | 12% |
|   |        |        | HOMO-3 -> LUMO   | 0.40370  | 33% |
|   |        |        | HOMO-3 -> LUMO+1 | 0.16279  | 5%  |
|   |        |        | HOMO-2 -> LUMO+2 | 0.13311  | 4%  |
|   |        |        | HOMO-1 -> LUMO   | -0.10536 | 2%  |
|   |        |        | HOMO-1 -> LUMO+2 | 0.12042  | 3%  |
|   |        |        | HOMO -> LUMO+1   | 0.24453  | 12% |
|   |        |        | HOMO -> LUMO+2   | -0.17479 | 6%  |
|   |        |        | HOMO -> LUMO+3   | 0.14119  | 4%  |
|   |        |        | HOMO -> LUMO+4   | -0.18536 | 7%  |
| 7 | 296.53 | 0.0532 | HOMO-4 -> LUMO   | 0.33768  | 23% |
|   |        |        | HOMO-3 -> LUMO+1 | -0.25015 | 13% |
|   |        |        | HOMO-3 -> LUMO+2 | 0.10664  | 2%  |
|   |        |        | HOMO-2 -> LUMO   | -0.29666 | 18% |
|   |        |        | HOMO-2 -> LUMO+1 | 0.16844  | 6%  |
|   |        |        | HOMO-1 -> LUMO   | -0.12268 | 3%  |
|   |        |        | HOMO-1 -> LUMO+2 | -0.12068 | 3%  |
|   |        |        | HOMO -> LUMO     | 0.17956  | 6%  |
|   |        |        | HOMO -> LUMO+1   | 0.19637  | 8%  |
|   |        |        | HOMO -> LUMO+2   | -0.18972 | 7%  |
| 8 | 289.64 | 0.2304 | HOMO-5 -> LUMO   | 0.11651  | 3%  |
|   |        |        | HOMO-4 -> LUMO+1 | 0.20871  | 9%  |
|   |        |        | HOMO-3 -> LUMO   | -0.11471 | 3%  |
|   |        |        | HOMO-2 -> LUMO   | 0.16048  | 5%  |
|   |        |        | HOMO-2 -> LUMO+1 | -0.25237 | 13% |



|    |        |        |                  |          |     |
|----|--------|--------|------------------|----------|-----|
|    |        |        | HOMO-2 -> LUMO+2 | 0.18108  | 7%  |
|    |        |        | HOMO-1 -> LUMO   | 0.25281  | 13% |
|    |        |        | HOMO-1 -> LUMO+1 | 0.17464  | 6%  |
|    |        |        | HOMO-1 -> LUMO+2 | -0.21062 | 9%  |
|    |        |        | HOMO -> LUMO+4   | -0.25051 | 13% |
| 9  | 287.08 | 0.7902 | HOMO-5 -> LUMO   | 0.10502  | 2%  |
|    |        |        | HOMO-4 -> LUMO+2 | -0.15067 | 5%  |
|    |        |        | HOMO-2 -> LUMO+1 | -0.10516 | 2%  |
|    |        |        | HOMO-1 -> LUMO+1 | 0.36597  | 27% |
|    |        |        | HOMO-1 -> LUMO+2 | 0.38589  | 30% |
|    |        |        | HOMO -> LUMO+1   | 0.17100  | 6%  |
|    |        |        | HOMO -> LUMO+2   | -0.13883 | 4%  |
|    |        |        | HOMO -> LUMO+3   | -0.25449 | 13% |
| 10 | 276.83 | 0.3512 | HOMO-4 -> LUMO+2 | -0.11055 | 2%  |
|    |        |        | HOMO-3 -> LUMO+1 | -0.10178 | 2%  |
|    |        |        | HOMO-2 -> LUMO+1 | -0.18349 | 7%  |
|    |        |        | HOMO-2 -> LUMO+2 | -0.20128 | 8%  |
|    |        |        | HOMO-1 -> LUMO+1 | 0.10752  | 2%  |
|    |        |        | HOMO-1 -> LUMO+2 | -0.13976 | 4%  |
|    |        |        | HOMO -> LUMO+1   | 0.19320  | 7%  |
|    |        |        | HOMO -> LUMO+3   | 0.31043  | 19% |
|    |        |        | HOMO -> LUMO+4   | 0.33565  | 23% |
|    |        |        | HOMO -> LUMO+5   | 0.23743  | 11% |
| 11 | 274.62 | 0.0698 | HOMO-5 -> LUMO   | -0.11309 | 3%  |
|    |        |        | HOMO-4 -> LUMO   | 0.17813  | 6%  |
|    |        |        | HOMO-4 -> LUMO+1 | -0.21028 | 9%  |
|    |        |        | HOMO-3 -> LUMO   | -0.16439 | 5%  |
|    |        |        | HOMO-3 -> LUMO+1 | 0.36779  | 27% |
|    |        |        | HOMO-2 -> LUMO   | -0.22462 | 10% |
|    |        |        | HOMO-2 -> LUMO+1 | -0.28165 | 16% |
|    |        |        | HOMO-1 -> LUMO+1 | 0.11304  | 3%  |
|    |        |        | HOMO -> LUMO+4   | -0.10426 | 2%  |
| 12 | 266.75 | 0.0086 | HOMO-5 -> LUMO   | -0.28368 | 16% |
|    |        |        | HOMO-5 -> LUMO+1 | -0.10988 | 2%  |
|    |        |        | HOMO-4 -> LUMO   | -0.26134 | 14% |
|    |        |        | HOMO-4 -> LUMO+1 | -0.17157 | 6%  |
|    |        |        | HOMO-3 -> LUMO+1 | -0.17288 | 6%  |
|    |        |        | HOMO-2 -> LUMO+1 | 0.18541  | 7%  |
|    |        |        | HOMO-1 -> LUMO+1 | 0.36194  | 26% |

|    |        |        |                  |          |     |
|----|--------|--------|------------------|----------|-----|
|    |        |        | HOMO-1 -> LUMO+2 | -0.18409 | 7%  |
| 13 | 264.83 | 0.0473 | HOMO-4 -> LUMO+2 | 0.11337  | 3%  |
|    |        |        | HOMO-3 -> LUMO+1 | 0.13854  | 4%  |
|    |        |        | HOMO-2 -> LUMO+2 | 0.46086  | 42% |
|    |        |        | HOMO-1 -> LUMO+2 | -0.10740 | 2%  |
|    |        |        | HOMO -> LUMO+4   | 0.33888  | 23% |
|    |        |        | HOMO -> LUMO+5   | 0.17773  | 6%  |
|    |        |        | HOMO -> LUMO+6   | 0.10169  | 2%  |
| 14 | 260.32 | 0.0268 | HOMO-9 -> LUMO   | 0.14261  | 4%  |
|    |        |        | HOMO-6 -> LUMO+2 | -0.12171 | 3%  |
|    |        |        | HOMO-5 -> LUMO   | -0.24407 | 12% |
|    |        |        | HOMO-5 -> LUMO+1 | 0.15266  | 5%  |
|    |        |        | HOMO-4 -> LUMO+1 | 0.29133  | 17% |
|    |        |        | HOMO-4 -> LUMO+3 | -0.10659 | 2%  |
|    |        |        | HOMO-3 -> LUMO   | -0.18193 | 7%  |
|    |        |        | HOMO-3 -> LUMO+3 | -0.15566 | 5%  |
|    |        |        | HOMO-2 -> LUMO+3 | -0.18216 | 7%  |
|    |        |        | HOMO-1 -> LUMO+2 | 0.11077  | 2%  |
|    |        |        | HOMO-1 -> LUMO+3 | -0.13208 | 3%  |
|    |        |        | HOMO-1 -> LUMO+4 | 0.14892  | 4%  |
|    |        |        | HOMO -> LUMO+5   | 0.15485  | 5%  |
|    |        |        | HOMO -> LUMO+6   | -0.12618 | 3%  |
| 15 | 257.59 | 0.2677 | HOMO-9 -> LUMO   | -0.13712 | 4%  |
|    |        |        | HOMO-5 -> LUMO   | 0.22251  | 10% |
|    |        |        | HOMO-5 -> LUMO+1 | -0.18937 | 7%  |
|    |        |        | HOMO-4 -> LUMO+2 | 0.25486  | 13% |
|    |        |        | HOMO-3 -> LUMO   | 0.15177  | 5%  |
|    |        |        | HOMO-3 -> LUMO+2 | 0.19203  | 7%  |
|    |        |        | HOMO-3 -> LUMO+4 | 0.12050  | 3%  |
|    |        |        | HOMO-2 -> LUMO+3 | -0.15555 | 5%  |
|    |        |        | HOMO-1 -> LUMO+3 | -0.24449 | 12% |
|    |        |        | HOMO -> LUMO+3   | -0.10526 | 2%  |
|    |        |        | HOMO -> LUMO+5   | 0.21906  | 10% |

**Table S13.** Calculated absorption dissymmetry factors ( $g_{\text{abs}}$ ) for the  $S_0 \rightarrow S_1$  transition.<sup>[a]</sup>

| Compound | $ m ^{[b]} / 10^{-20} \text{ erg G}^{-1}$ | $ \mu ^{[c]} / 10^{-20} \text{ esu cm}$ | $\theta_{\mu,m}^{[d]} / \text{deg}$ | $ g_{\text{abs,calc}}  / 10^{-3}$ |
|----------|-------------------------------------------|-----------------------------------------|-------------------------------------|-----------------------------------|
| EH2      | 0.77                                      | 403.3                                   | 100.1                               | 1.34                              |
| EH3      | 1.21                                      | 358.4                                   | 97.6                                | 1.79                              |

[a] Calculated at the M06-2X/def2-SVP level in the gas phase using the geometry optimized in the  $S_0$  state. [b] Transition magnetic dipole moment for the  $S_0 \rightarrow S_1$  transition. [c] Transition electric dipole moment for the  $S_0 \rightarrow S_1$  transition. [d] Angle between  $\mu$  and  $m$  for the  $S_0 \rightarrow S_1$  transition.

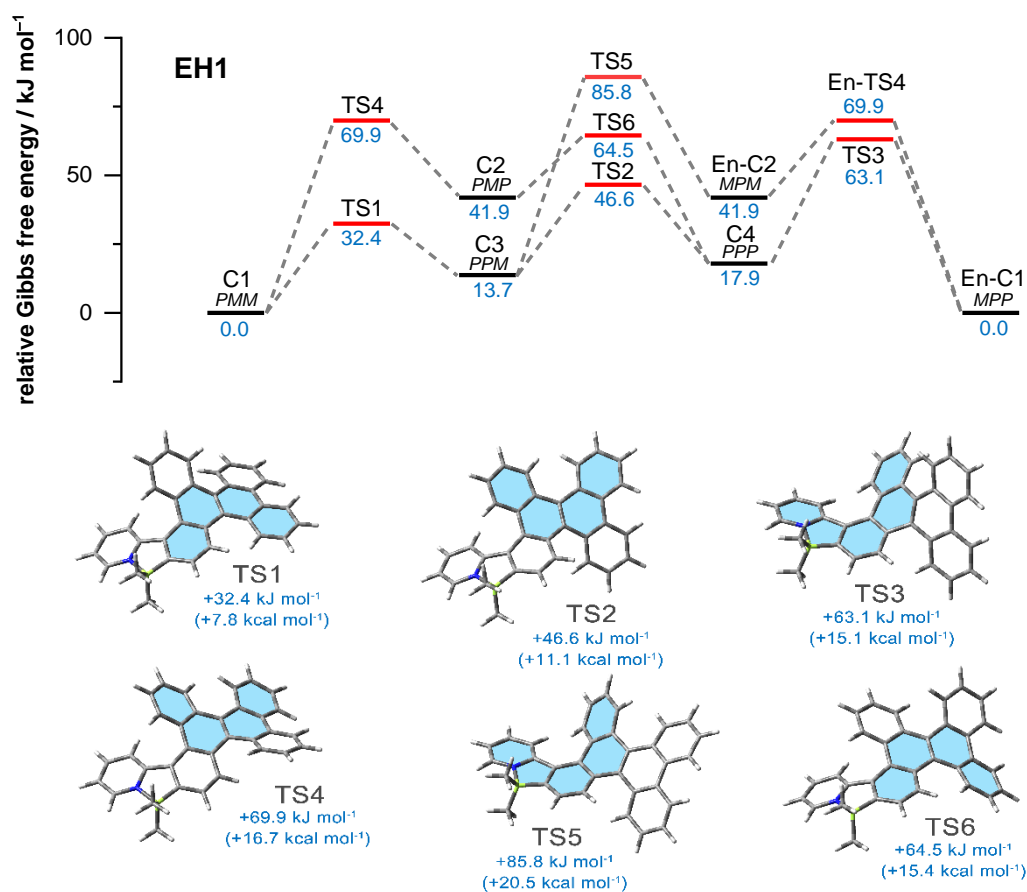

**Figure S65.** Interconversion pathway of EH1 calculated at the B3LYP-D3(BJ)/def2-SVP (solvent CH<sub>2</sub>Cl<sub>2</sub>, PCM model) level (top). The relative Gibbs free energies of the stationary points are given in kJ mol<sup>-1</sup>. Only one enantiomeric pathway was shown in each case for simplicity. The structures of the transition states (bottom) alongside with their relative Gibbs free energies.

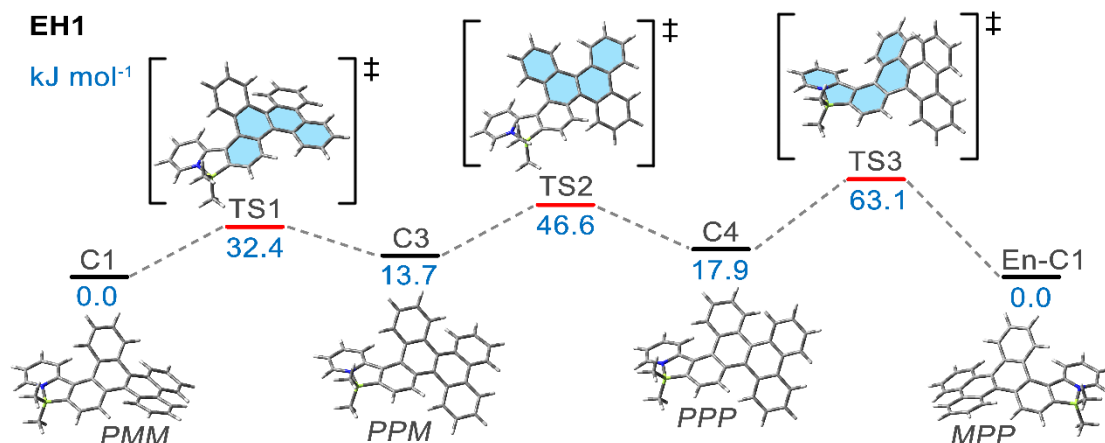

**Figure S66.** The most plausible interconversion pathway of EH1. The relative Gibbs free energies of the stationary points are given in kJ mol<sup>-1</sup>.

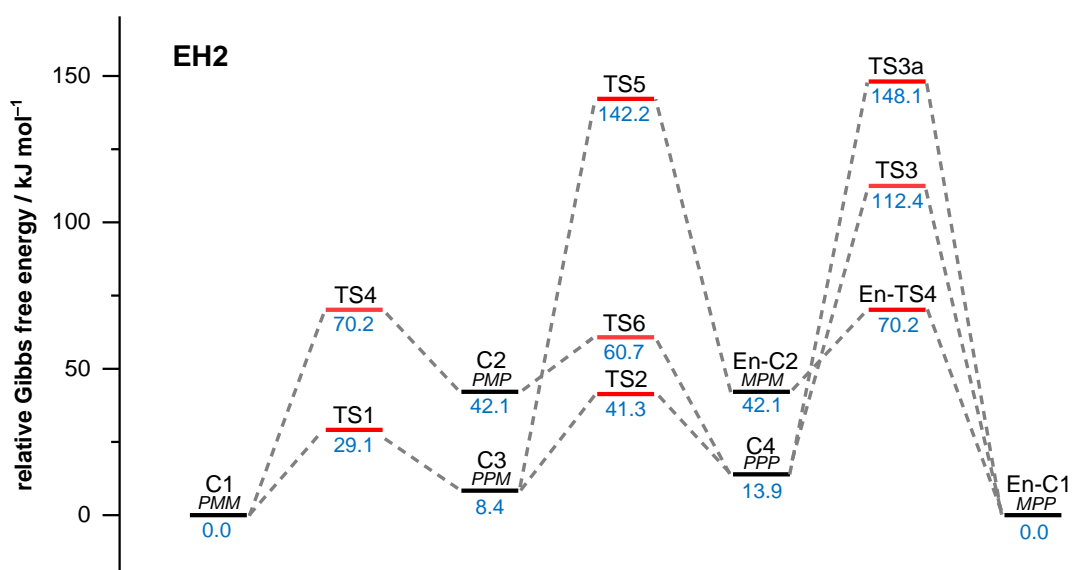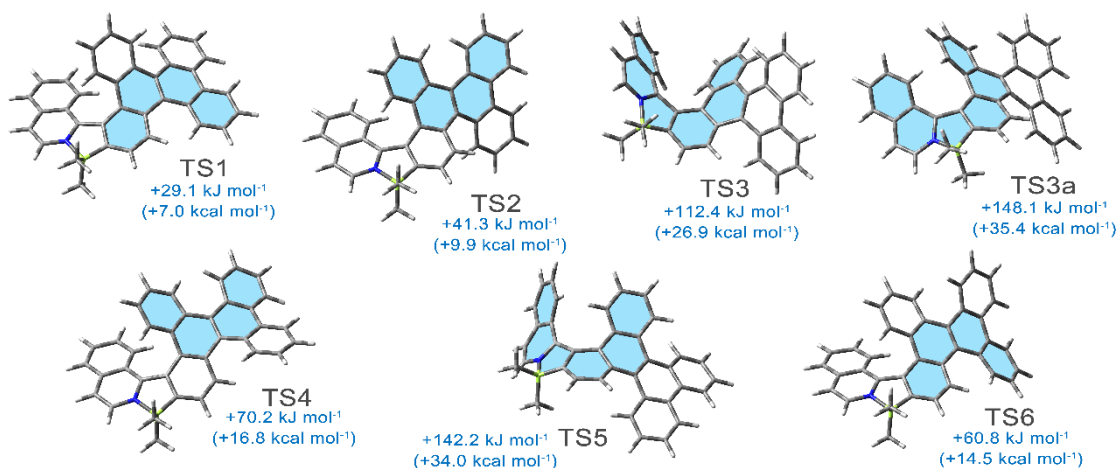

**Figure S67.** Interconversion pathway of **EH2** calculated at the B3LYP-D3(BJ)/def2-SVP (solvent CH<sub>2</sub>Cl<sub>2</sub>, PCM model) level (top). The relative Gibbs free energies of the stationary points are given in kJ mol<sup>-1</sup>. Only one enantiomeric pathway was shown in each case for simplicity. The structures of the transition states (bottom) alongside with their relative Gibbs free energies.

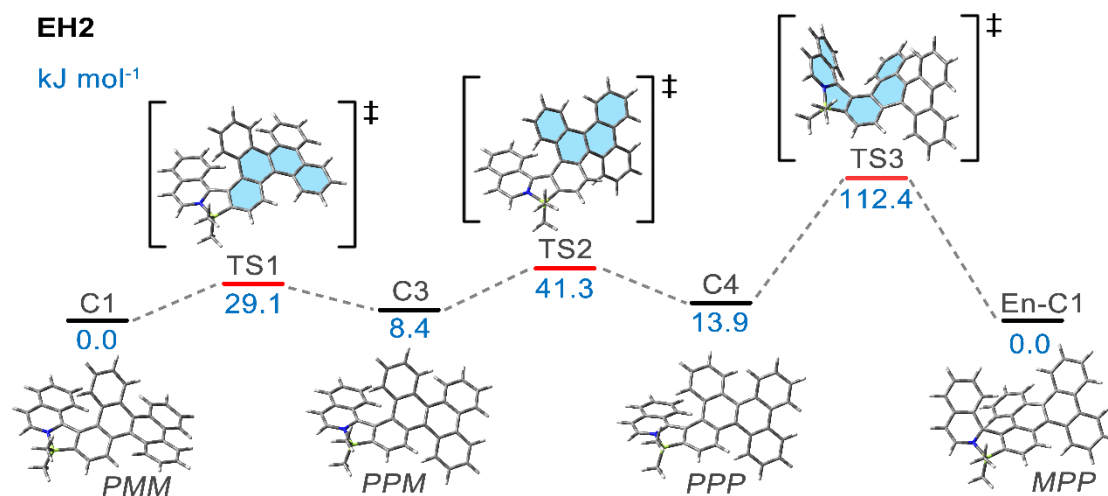

**Figure S68.** The most plausible interconversion pathway of **EH2**. The relative Gibbs free energies of the stationary points are given in kJ mol<sup>-1</sup>.

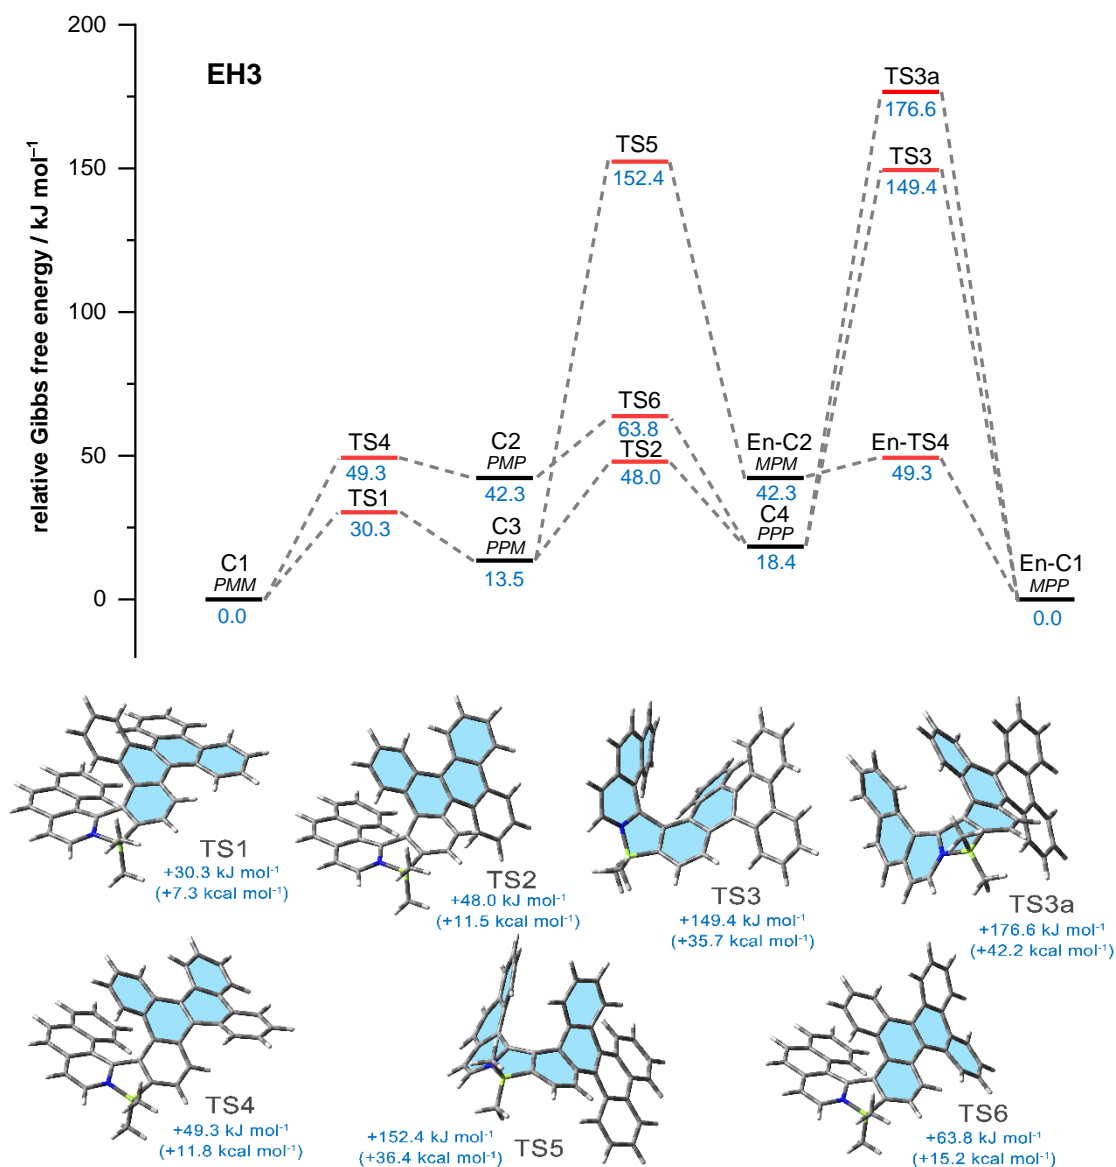

**Figure S69.** Interconversion pathway of **EH3** calculated at the B3LYP-D3(BJ)/def2-SVP (solvent  $\text{CH}_2\text{Cl}_2$ , PCM model) level (top). The relative Gibbs free energies of the stationary points are given in  $\text{kJ mol}^{-1}$ . Only one enantiomeric pathway was shown in each case for simplicity. The structures of the transition states (bottom) alongside with their relative Gibbs free energies.

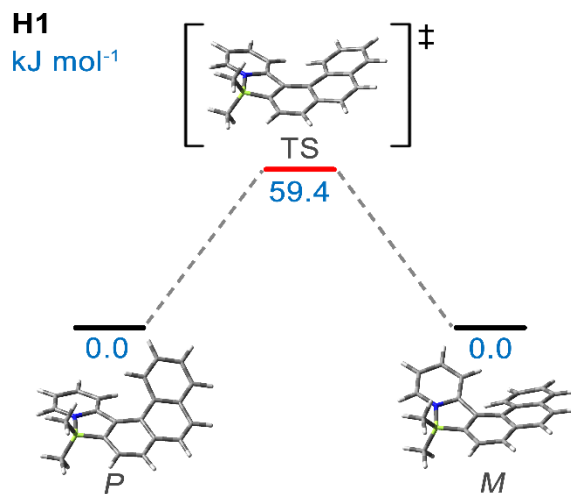

**Figure S70.** Interconversion pathway of **H1** calculated at the B3LYP-D3(BJ)/def2-SVP (solvent  $\text{CH}_2\text{Cl}_2$ , PCM model) level (top). The relative Gibbs free energies of the stationary points are given in  $\text{kJ mol}^{-1}$ .

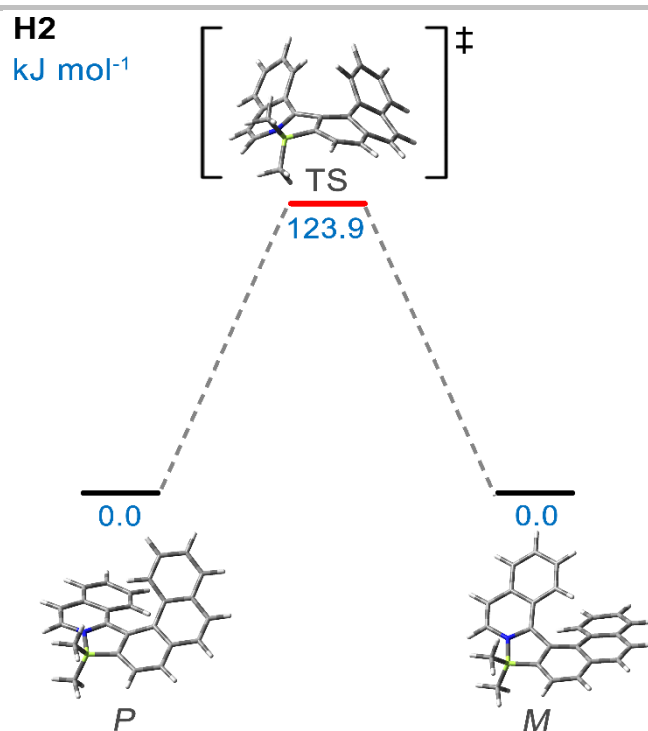

**Figure S71.** Interconversion pathway of **H2** calculated at the B3LYP-D3(BJ)/def2-SVP (solvent CH<sub>2</sub>Cl<sub>2</sub>, PCM model) level (top). The relative Gibbs free energies of the stationary points are given in kJ mol<sup>-1</sup>.

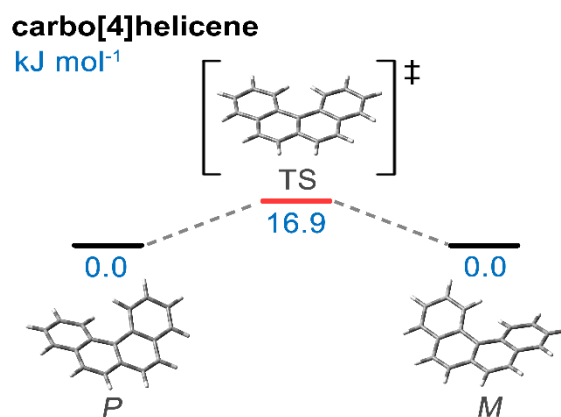

**Figure S72.** Interconversion pathway of carbo[4]helicene calculated at the B3LYP-D3(BJ)/def2-SVP (solvent CH<sub>2</sub>Cl<sub>2</sub>, PCM model) level (top). The relative Gibbs free energies of the stationary points are given in kJ mol<sup>-1</sup>.

**Cartesian coordinates (B3LYP-D3(BJ)/def2-TZVP, CH<sub>2</sub>Cl<sub>2</sub>, PCM model)**

**EH1**

*PMM* (C1)

$E = -1352.305789$  Hartree

| Symbol | X         | Y         | Z         |
|--------|-----------|-----------|-----------|
| C      | 1.596628  | 2.679003  | -0.215243 |
| C      | 0.269655  | 2.323417  | -0.104431 |
| C      | -0.123759 | 1.006454  | 0.220820  |
| C      | 0.883900  | 0.015393  | 0.365472  |
| C      | -1.831272 | -0.741932 | 0.105048  |
| C      | -0.873536 | -1.694021 | 0.639839  |
| C      | 0.464506  | -1.281856 | 0.859208  |
| C      | -1.283138 | -2.938668 | 1.161964  |
| C      | -0.421509 | -3.732524 | 1.888335  |

---

|   |           |           |           |
|---|-----------|-----------|-----------|
| C | 0.881343  | -3.296696 | 2.147944  |
| C | 1.304315  | -2.083720 | 1.649725  |
| C | 2.220586  | 0.375455  | 0.060569  |
| C | 3.376348  | -0.486954 | -0.224115 |
| N | 4.491557  | 0.270150  | -0.400050 |
| B | 4.177129  | 1.854135  | -0.355747 |
| C | 2.597616  | 1.709775  | -0.146950 |
| C | 3.456285  | -1.861840 | -0.455368 |
| C | 4.674115  | -2.431231 | -0.779664 |
| C | 5.813943  | -1.635589 | -0.874656 |
| C | 5.673882  | -0.275951 | -0.693040 |
| C | 4.612002  | 2.507789  | -1.776070 |
| C | 4.932411  | 2.522320  | 0.917842  |
| C | -1.525127 | 0.609189  | 0.231725  |
| C | -4.431255 | -2.713865 | -1.763546 |
| C | -3.273257 | -2.391861 | -1.090138 |
| C | -3.093885 | -1.124503 | -0.497187 |
| C | -4.122560 | -0.160828 | -0.644061 |
| C | -5.294677 | -0.515098 | -1.334362 |
| C | -5.457977 | -1.771643 | -1.876834 |
| C | -2.631385 | 1.547233  | 0.347931  |
| C | -3.930058 | 1.158986  | -0.070448 |
| C | -2.490602 | 2.782490  | 1.015182  |
| C | -3.559891 | 3.632108  | 1.197120  |
| C | -4.824392 | 3.274675  | 0.721227  |
| C | -5.001539 | 2.050507  | 0.113941  |
| H | 1.853163  | 3.709372  | -0.432442 |
| H | -0.485477 | 3.065040  | -0.309071 |
| H | -2.311772 | -3.245976 | 1.056419  |
| H | -0.773460 | -4.670138 | 2.298384  |
| H | 1.543989  | -3.890843 | 2.763306  |
| H | 2.291437  | -1.723095 | 1.898358  |
| H | 6.780014  | -2.054425 | -1.113465 |
| H | 6.500513  | 0.411398  | -0.801537 |
| H | 4.294071  | 3.554317  | -1.814815 |
| H | 5.697432  | 2.501567  | -1.923431 |
| H | 4.158817  | 2.000765  | -2.633939 |
| H | 4.659431  | 3.578136  | 1.007651  |
| H | 4.675362  | 2.038941  | 1.865612  |
| H | 6.022051  | 2.482150  | 0.809671  |
| H | -4.532951 | -3.688212 | -2.223354 |
| H | -2.467715 | -3.109063 | -1.060928 |
| H | -1.537092 | 3.048036  | 1.442990  |
| H | -3.420688 | 4.564010  | 1.729319  |
| H | -5.668333 | 3.937386  | 0.860798  |
| H | -5.995645 | 1.760115  | -0.192903 |
| H | -6.366560 | -2.016505 | -2.411098 |

---

|   |           |           |           |
|---|-----------|-----------|-----------|
| H | -6.077520 | 0.216842  | -1.469425 |
| H | 2.571791  | -2.472069 | -0.390953 |
| H | 4.736313  | -3.495560 | -0.962734 |

**PMP (C2)**

*E* = -1352.289031 Hartree

| Symbol | X         | Y         | Z         |
|--------|-----------|-----------|-----------|
| C      | -1.633378 | -2.633872 | -0.132821 |
| C      | -0.309658 | -2.263138 | -0.181922 |
| C      | 0.108673  | -0.943640 | 0.107108  |
| C      | -0.884960 | 0.052208  | 0.291999  |
| C      | 1.898527  | 0.763248  | 0.061426  |
| C      | 0.870111  | 1.787185  | 0.197019  |
| C      | -0.443805 | 1.398149  | 0.575886  |
| C      | 1.079553  | 3.176462  | 0.031482  |
| C      | 0.184479  | 4.108546  | 0.510517  |
| C      | -0.961484 | 3.687779  | 1.194206  |
| C      | -1.279811 | 2.348959  | 1.188364  |
| C      | -2.248071 | -0.324578 | 0.114617  |
| C      | -3.435314 | 0.500074  | -0.172029 |
| N      | -4.555563 | -0.271281 | -0.154886 |
| B      | -4.219350 | -1.841015 | 0.001949  |
| C      | -2.629513 | -1.669964 | 0.025356  |
| C      | -3.552242 | 1.827256  | -0.593262 |
| C      | -4.799828 | 2.350593  | -0.878460 |
| C      | -5.937782 | 1.557523  | -0.747762 |
| C      | -5.766133 | 0.234107  | -0.402899 |
| C      | -4.797929 | -2.624538 | -1.295964 |
| C      | -4.816322 | -2.395997 | 1.407400  |
| C      | 1.517091  | -0.576874 | 0.144818  |
| C      | 5.188083  | 2.650515  | -0.170113 |
| C      | 3.889001  | 2.343376  | 0.174729  |
| C      | 3.319402  | 1.080702  | -0.096657 |
| C      | 4.210260  | 0.059581  | -0.524407 |
| C      | 5.507164  | 0.410711  | -0.940931 |
| C      | 5.985591  | 1.694756  | -0.803135 |
| C      | 2.547525  | -1.605210 | 0.210652  |
| C      | 3.831634  | -1.326771 | -0.312751 |
| C      | 2.339685  | -2.861377 | 0.816404  |
| C      | 3.289896  | -3.857315 | 0.760266  |
| C      | 4.493312  | -3.629887 | 0.086099  |
| C      | 4.764280  | -2.376304 | -0.416561 |
| H      | -1.903401 | -3.669519 | -0.303124 |
| H      | 0.423291  | -3.000569 | -0.462485 |
| H      | 1.953386  | 3.527301  | -0.487842 |
| H      | 0.389104  | 5.163196  | 0.380949  |
| H      | -1.616691 | 4.405109  | 1.670146  |
| H      | -2.202300 | 2.014556  | 1.639233  |



---

|   |           |           |           |
|---|-----------|-----------|-----------|
| H | -6.926075 | 1.943685  | -0.947330 |
| H | -6.590625 | -0.462091 | -0.347944 |
| H | -4.463437 | -3.666529 | -1.278861 |
| H | -5.892830 | -2.645260 | -1.318737 |
| H | -4.455609 | -2.191333 | -2.241294 |
| H | -5.911655 | -2.367487 | 1.418950  |
| H | -4.522535 | -3.438966 | 1.559567  |
| H | -4.460786 | -1.828782 | 2.273299  |
| H | 5.584577  | 3.631559  | 0.056557  |
| H | 3.317287  | 3.084688  | 0.703306  |
| H | 1.426321  | -3.040169 | 1.361468  |
| H | 3.104765  | -4.807620 | 1.243422  |
| H | 5.233758  | -4.415160 | 0.008495  |
| H | 5.737307  | -2.191107 | -0.845760 |
| H | 6.163570  | -0.348187 | -1.339808 |
| H | 6.989642  | 1.939187  | -1.123853 |
| H | -4.886154 | 3.377169  | -1.208526 |
| H | -2.673438 | 2.436794  | -0.707415 |

**PPM (C3)**

$E = -1352.300298$  Hartree

| Symbol | X         | Y         | Z         |
|--------|-----------|-----------|-----------|
| C      | 1.761607  | 2.377289  | 1.082099  |
| C      | 0.413683  | 2.106128  | 0.984155  |
| C      | -0.065686 | 0.872200  | 0.486438  |
| C      | 0.880027  | -0.162570 | 0.280092  |
| C      | -1.911886 | -0.718105 | 0.154019  |
| C      | -0.983024 | -1.777758 | 0.518879  |
| C      | 0.412092  | -1.522161 | 0.475378  |
| C      | -1.415115 | -3.018722 | 1.029513  |
| C      | -0.525412 | -3.999319 | 1.409821  |
| C      | 0.848670  | -3.761134 | 1.323826  |
| C      | 1.299140  | -2.535078 | 0.889996  |
| C      | 2.239438  | 0.225159  | 0.136003  |
| C      | 3.336137  | -0.492695 | -0.513719 |
| N      | 4.493904  | 0.207399  | -0.390617 |
| B      | 4.279944  | 1.620214  | 0.367825  |
| C      | 2.696276  | 1.478027  | 0.560233  |
| C      | 3.321680  | -1.650178 | -1.294537 |
| C      | 4.495361  | -2.093673 | -1.874626 |
| C      | 5.680359  | -1.384978 | -1.680059 |
| C      | 5.632964  | -0.223604 | -0.937914 |
| C      | 4.726246  | 2.817999  | -0.632373 |
| C      | 5.102258  | 1.609622  | 1.768188  |
| C      | -1.472410 | 0.599970  | 0.211473  |
| C      | -5.029185 | -2.562089 | -0.904841 |
| C      | -3.703771 | -2.275939 | -0.666159 |
| C      | -3.289468 | -1.007254 | -0.207954 |

---

|   |           |           |           |
|---|-----------|-----------|-----------|
| C | -4.258381 | 0.024144  | -0.142353 |
| C | -5.613324 | -0.305819 | -0.339418 |
| C | -6.000902 | -1.579346 | -0.691334 |
| C | -2.418345 | 1.677641  | -0.053095 |
| C | -3.810833 | 1.402347  | -0.042844 |
| C | -2.017386 | 2.994151  | -0.368074 |
| C | -2.925145 | 4.022970  | -0.485698 |
| C | -4.287145 | 3.773025  | -0.295536 |
| C | -4.716340 | 2.478750  | -0.105927 |
| H | 2.086947  | 3.314192  | 1.518477  |
| H | -0.295602 | 2.837191  | 1.338801  |
| H | -2.468846 | -3.192175 | 1.175260  |
| H | -0.894011 | -4.934022 | 1.811608  |
| H | 1.556442  | -4.511020 | 1.651962  |
| H | 2.355482  | -2.325409 | 0.938996  |
| H | 6.613137  | -1.712659 | -2.113934 |
| H | 6.502208  | 0.398236  | -0.778899 |
| H | 4.482155  | 3.785581  | -0.183105 |
| H | 5.804792  | 2.820227  | -0.824050 |
| H | 4.218363  | 2.774296  | -1.601128 |
| H | 4.893824  | 2.522141  | 2.334976  |
| H | 4.838284  | 0.762530  | 2.408966  |
| H | 6.184887  | 1.576521  | 1.603162  |
| H | -5.313477 | -3.543023 | -1.262520 |
| H | -2.963145 | -3.035358 | -0.859648 |
| H | -0.976834 | 3.202331  | -0.551805 |
| H | -2.580605 | 5.019039  | -0.730781 |
| H | -5.005857 | 4.580177  | -0.348864 |
| H | -5.777376 | 2.291003  | -0.042300 |
| H | -6.370879 | 0.458554  | -0.255958 |
| H | -7.048175 | -1.802273 | -0.847613 |
| H | 4.490421  | -2.988259 | -2.482707 |
| H | 2.397724  | -2.184694 | -1.445617 |

**PPP (C4)**

$E = -1352.298778$  Hartree

| Symbol | X         | Y         | Z         |
|--------|-----------|-----------|-----------|
| C      | -1.616258 | -2.288631 | 1.253241  |
| C      | -0.305261 | -2.043730 | 0.917986  |
| C      | 0.094173  | -0.818236 | 0.332209  |
| C      | -0.867194 | 0.209486  | 0.181070  |
| C      | 1.960593  | 0.744088  | 0.034187  |
| C      | 1.003246  | 1.826890  | -0.086331 |
| C      | -0.389957 | 1.570899  | 0.049785  |
| C      | 1.396870  | 3.143520  | -0.418157 |
| C      | 0.505457  | 4.191565  | -0.418650 |
| C      | -0.823006 | 3.967083  | -0.040926 |
| C      | -1.253316 | 2.678915  | 0.174956  |

---

|   |           |           |           |
|---|-----------|-----------|-----------|
| C | -2.237334 | -0.190263 | 0.250310  |
| C | -3.427026 | 0.422365  | -0.352312 |
| N | -4.547058 | -0.244705 | 0.033529  |
| B | -4.207673 | -1.548364 | 0.922761  |
| C | -2.615522 | -1.398761 | 0.846055  |
| C | -3.542346 | 1.417241  | -1.326898 |
| C | -4.791230 | 1.761131  | -1.809240 |
| C | -5.928343 | 1.115856  | -1.325873 |
| C | -5.758102 | 0.097045  | -0.412731 |
| C | -4.793915 | -1.355318 | 2.425209  |
| C | -4.797537 | -2.857533 | 0.166310  |
| C | 1.489562  | -0.563597 | 0.025753  |
| C | 5.224584  | 2.297609  | 1.136549  |
| C | 3.887323  | 2.138818  | 0.844167  |
| C | 3.387802  | 0.955362  | 0.258353  |
| C | 4.297384  | -0.113906 | 0.057900  |
| C | 5.658929  | 0.076631  | 0.352702  |
| C | 6.126935  | 1.266523  | 0.865297  |
| C | 2.397684  | -1.633153 | -0.365725 |
| C | 3.792806  | -1.391565 | -0.410236 |
| C | 1.919406  | -2.856567 | -0.882700 |
| C | 2.775213  | -3.821705 | -1.366212 |
| C | 4.154202  | -3.594935 | -1.366627 |
| C | 4.645721  | -2.391921 | -0.908711 |
| H | -1.875915 | -3.201582 | 1.775753  |
| H | 0.452611  | -2.771743 | 1.165658  |
| H | 2.419799  | 3.331114  | -0.700961 |
| H | 0.841059  | 5.185641  | -0.683309 |
| H | -1.513294 | 4.793871  | 0.062563  |
| H | -2.277727 | 2.515235  | 0.465616  |
| H | -6.917468 | 1.372393  | -1.674453 |
| H | -6.585011 | -0.488098 | -0.036774 |
| H | -4.491921 | -2.193509 | 3.060465  |
| H | -5.889268 | -1.328525 | 2.430905  |
| H | -4.436976 | -0.439013 | 2.905577  |
| H | -4.468204 | -3.763493 | 0.684515  |
| H | -4.458542 | -2.937904 | -0.871525 |
| H | -5.892726 | -2.877549 | 0.159149  |
| H | 5.565832  | 3.213640  | 1.600932  |
| H | 3.204446  | 2.922656  | 1.126400  |
| H | 0.856738  | -3.026274 | -0.948761 |
| H | 2.373509  | -4.742289 | -1.768978 |
| H | 4.831604  | -4.345205 | -1.752869 |
| H | 5.708734  | -2.209017 | -0.963697 |
| H | 7.178245  | 1.383681  | 1.093071  |
| H | 6.353479  | -0.738197 | 0.211419  |
| H | -2.659298 | 1.903475  | -1.706822 |

---

|   |           |          |           |
|---|-----------|----------|-----------|
| H | -4.881199 | 2.528213 | -2.566638 |
|---|-----------|----------|-----------|

**EH2***PMM (C1)**E = -1506.015593 Hartree*

| Symbol | X         | Y         | Z         |
|--------|-----------|-----------|-----------|
| C      | 0.768350  | 3.184314  | -0.458652 |
| C      | -0.491968 | 2.629919  | -0.376060 |
| C      | -0.693284 | 1.311640  | 0.090064  |
| C      | 0.450115  | 0.508632  | 0.350496  |
| C      | -2.112887 | -0.675954 | 0.254483  |
| C      | -1.028568 | -1.378845 | 0.916871  |
| C      | 0.231486  | -0.745097 | 1.040521  |
| C      | -1.241361 | -2.582103 | 1.621256  |
| C      | -0.260114 | -3.129545 | 2.420044  |
| C      | 0.969579  | -2.480022 | 2.565857  |
| C      | 1.200297  | -1.301703 | 1.891891  |
| C      | 1.724114  | 1.032048  | 0.013553  |
| C      | 3.023561  | 0.362150  | -0.132716 |
| N      | 4.008912  | 1.274125  | -0.118096 |
| B      | 3.454210  | 2.783903  | -0.257914 |
| C      | 1.902296  | 2.399201  | -0.250958 |
| C      | 3.347117  | -0.999247 | -0.422013 |
| C      | 4.722812  | -1.375083 | -0.409419 |
| C      | 5.705203  | -0.373123 | -0.217961 |
| C      | 5.317095  | 0.927933  | -0.137579 |
| C      | 2.387733  | -1.963229 | -0.805073 |
| C      | 2.762269  | -3.252863 | -1.080760 |
| C      | 4.111195  | -3.644264 | -0.974002 |
| C      | 5.073732  | -2.721573 | -0.655168 |
| C      | 4.009532  | 3.387749  | -1.659688 |
| C      | 3.880286  | 3.667136  | 1.036557  |
| C      | -2.017424 | 0.710086  | 0.167158  |
| C      | -4.342399 | -3.287066 | -1.278921 |
| C      | -3.262853 | -2.692347 | -0.663315 |
| C      | -3.290131 | -1.335928 | -0.276344 |
| C      | -4.448570 | -0.575057 | -0.572123 |
| C      | -5.536384 | -1.205667 | -1.200373 |
| C      | -5.495560 | -2.540918 | -1.540064 |
| C      | -3.257722 | 1.472206  | 0.147586  |
| C      | -4.472075 | 0.829936  | -0.207084 |
| C      | -3.325241 | 2.797422  | 0.627457  |
| C      | -4.516429 | 3.487919  | 0.681645  |
| C      | -5.699205 | 2.873991  | 0.261207  |
| C      | -5.671618 | 1.561678  | -0.157998 |
| H      | 0.873200  | 4.224971  | -0.742663 |
| H      | -1.340636 | 3.218975  | -0.683270 |
| H      | -2.212947 | -3.050133 | 1.591795  |
| H      | -0.461995 | -4.040717 | 2.967905  |

---

|   |           |           |           |
|---|-----------|-----------|-----------|
| H | 1.726836  | -2.885622 | 3.223606  |
| H | 2.134095  | -0.779520 | 2.038269  |
| H | 6.753867  | -0.633547 | -0.203368 |
| H | 6.019017  | 1.746954  | -0.089905 |
| H | 4.388741  | -4.671046 | -1.172913 |
| H | 6.118137  | -3.002755 | -0.616822 |
| H | 3.549899  | 4.363329  | -1.846556 |
| H | 5.093405  | 3.544126  | -1.646424 |
| H | 3.777344  | 2.750258  | -2.518605 |
| H | 3.436888  | 4.665659  | 0.976816  |
| H | 3.551293  | 3.222144  | 1.980775  |
| H | 4.965860  | 3.803512  | 1.094735  |
| H | -4.285264 | -4.324911 | -1.580141 |
| H | -2.359896 | -3.265507 | -0.521752 |
| H | -2.435925 | 3.266681  | 1.016157  |
| H | -4.534497 | 4.496760  | 1.072759  |
| H | -6.637894 | 3.410841  | 0.300384  |
| H | -6.601835 | 1.078228  | -0.418056 |
| H | -6.343369 | -3.000632 | -2.030771 |
| H | -6.416735 | -0.631240 | -1.449057 |
| H | 2.016470  | -3.974871 | -1.384727 |
| H | 1.354635  | -1.676291 | -0.904180 |

**PMP (C2)**

*E* = -1505.998917 Hartree

| Symbol | X         | Y         | Z         |
|--------|-----------|-----------|-----------|
| C      | -0.808348 | 3.153001  | 0.270555  |
| C      | 0.438908  | 2.574338  | 0.356404  |
| C      | 0.673326  | 1.241393  | -0.058222 |
| C      | -0.451423 | 0.435573  | -0.367221 |
| C      | 2.176402  | -0.716546 | -0.245093 |
| C      | 1.010731  | -1.540282 | -0.543698 |
| C      | -0.221020 | -0.903086 | -0.850198 |
| C      | 0.999364  | -2.954404 | -0.587117 |
| C      | -0.028991 | -3.655088 | -1.180323 |
| C      | -1.097017 | -2.969518 | -1.767729 |
| C      | -1.203510 | -1.614075 | -1.562902 |
| C      | -1.746099 | 0.990913  | -0.165710 |
| C      | -3.060037 | 0.350070  | -0.012389 |
| N      | -4.033223 | 1.253646  | -0.211419 |
| B      | -3.470273 | 2.768431  | -0.189179 |
| C      | -1.928351 | 2.373619  | -0.022837 |
| C      | -3.415814 | -0.945719 | 0.475529  |
| C      | -4.792010 | -1.316305 | 0.442098  |
| C      | -5.750165 | -0.358277 | 0.026767  |
| C      | -5.344086 | 0.914843  | -0.224768 |
| C      | -2.492611 | -1.826852 | 1.081513  |
| C      | -2.899423 | -3.044736 | 1.561342  |

---

|   |           |           |           |
|---|-----------|-----------|-----------|
| C | -4.242561 | -3.449112 | 1.437655  |
| C | -5.172289 | -2.599134 | 0.895615  |
| C | -4.133585 | 3.519091  | 1.088825  |
| C | -3.767496 | 3.515654  | -1.599551 |
| C | 2.009062  | 0.665396  | -0.126537 |
| C | 5.126892  | -3.108442 | -0.271704 |
| C | 3.906114  | -2.549245 | -0.584672 |
| C | 3.524437  | -1.273406 | -0.117388 |
| C | 4.540088  | -0.486996 | 0.489525  |
| C | 5.748651  | -1.100159 | 0.866316  |
| C | 6.031420  | -2.404564 | 0.526284  |
| C | 3.189911  | 1.513265  | -0.012630 |
| C | 4.387301  | 0.957720  | 0.496541  |
| C | 3.213965  | 2.860487  | -0.427325 |
| C | 4.302086  | 3.671634  | -0.189125 |
| C | 5.415357  | 3.158523  | 0.482565  |
| C | 5.462221  | 1.817083  | 0.792641  |
| H | -0.924168 | 4.205396  | 0.502095  |
| H | 1.254914  | 3.162072  | 0.740785  |
| H | 1.802979  | -3.511209 | -0.139542 |
| H | 0.007682  | -4.736245 | -1.207042 |
| H | -1.862174 | -3.503129 | -2.315259 |
| H | -2.070194 | -1.082305 | -1.926479 |
| H | -6.798502 | -0.617310 | -0.013410 |
| H | -6.033188 | 1.719127  | -0.434993 |
| H | -4.544277 | -4.423831 | 1.798050  |
| H | -6.215083 | -2.883446 | 0.839802  |
| H | -3.670494 | 4.502658  | 1.216304  |
| H | -5.208299 | 3.687736  | 0.963139  |
| H | -3.991789 | 2.970405  | 2.025286  |
| H | -4.842357 | 3.645790  | -1.767717 |
| H | -3.321838 | 4.514953  | -1.602296 |
| H | -3.360491 | 2.976280  | -2.460438 |
| H | 5.379734  | -4.089768 | -0.651285 |
| H | 3.251465  | -3.095234 | -1.240035 |
| H | 2.373779  | 3.260729  | -0.972015 |
| H | 4.293557  | 4.698972  | -0.528661 |
| H | 6.261609  | 3.795043  | 0.705305  |
| H | 6.369664  | 1.416580  | 1.218705  |
| H | 6.495741  | -0.527889 | 1.395657  |
| H | 6.971676  | -2.852155 | 0.820060  |
| H | -2.181855 | -3.701690 | 2.033769  |
| H | -1.462557 | -1.529133 | 1.187827  |

**PPM (C3)**

$E = -1506.012322$  Hartree

| Symbol | X        | Y        | Z        |
|--------|----------|----------|----------|
| C      | 0.974906 | 3.063945 | 0.838364 |

---

|   |           |           |           |
|---|-----------|-----------|-----------|
| C | -0.316641 | 2.604845  | 0.686481  |
| C | -0.593745 | 1.246548  | 0.413640  |
| C | 0.489315  | 0.332952  | 0.446312  |
| C | -2.196435 | -0.617339 | 0.398825  |
| C | -1.156054 | -1.430291 | 1.012520  |
| C | 0.193410  | -1.002639 | 0.930799  |
| C | -1.442548 | -2.578093 | 1.779196  |
| C | -0.446654 | -3.325937 | 2.368267  |
| C | 0.888378  | -2.935418 | 2.232723  |
| C | 1.192079  | -1.782169 | 1.546473  |
| C | 1.796363  | 0.871755  | 0.286148  |
| C | 3.043252  | 0.225461  | -0.128346 |
| N | 4.085279  | 1.034879  | 0.122353  |
| B | 3.627797  | 2.509572  | 0.585292  |
| C | 2.054824  | 2.222986  | 0.560952  |
| C | 3.263182  | -0.993500 | -0.840474 |
| C | 4.610821  | -1.403174 | -1.063850 |
| C | 5.663445  | -0.550828 | -0.650711 |
| C | 5.364494  | 0.662606  | -0.113571 |
| C | 2.219564  | -1.773143 | -1.387048 |
| C | 2.493570  | -2.934941 | -2.061854 |
| C | 3.822434  | -3.376394 | -2.215927 |
| C | 4.860570  | -2.620958 | -1.735368 |
| C | 4.146339  | 3.570727  | -0.530164 |
| C | 4.182641  | 2.825078  | 2.078843  |
| C | -1.935112 | 0.728090  | 0.166951  |
| C | -4.985512 | -3.063396 | -0.291798 |
| C | -3.724214 | -2.551419 | -0.085673 |
| C | -3.502324 | -1.167140 | 0.076055  |
| C | -4.596667 | -0.290574 | -0.129236 |
| C | -5.883983 | -0.839865 | -0.286758 |
| C | -6.084955 | -2.200786 | -0.344391 |
| C | -2.993234 | 1.581749  | -0.356692 |
| C | -4.336465 | 1.123843  | -0.332487 |
| C | -2.743801 | 2.844894  | -0.935957 |
| C | -3.766268 | 3.687917  | -1.309873 |
| C | -5.094590 | 3.294883  | -1.122034 |
| C | -5.366190 | 2.024355  | -0.666628 |
| H | 1.145293  | 4.090957  | 1.138600  |
| H | -1.139033 | 3.283786  | 0.849110  |
| H | -2.469775 | -2.856238 | 1.950745  |
| H | -0.704552 | -4.192922 | 2.962258  |
| H | 1.676426  | -3.503199 | 2.709647  |
| H | 2.213963  | -1.438637 | 1.534798  |
| H | 6.692589  | -0.840618 | -0.807646 |
| H | 6.119572  | 1.387863  | 0.150266  |
| H | 4.021939  | -4.303523 | -2.736950 |
| H | 5.886197  | -2.933527 | -1.882615 |
| H | 3.750907  | 4.565505  | -0.302839 |

---

|   |           |           |           |
|---|-----------|-----------|-----------|
| H | 5.237993  | 3.657661  | -0.546030 |
| H | 3.819894  | 3.315730  | -1.543319 |
| H | 3.799450  | 3.788459  | 2.428534  |
| H | 3.880564  | 2.070355  | 2.811516  |
| H | 5.276060  | 2.890185  | 2.100562  |
| H | -5.120852 | -4.129506 | -0.418774 |
| H | -2.883327 | -3.226152 | -0.073770 |
| H | -1.728074 | 3.153101  | -1.119409 |
| H | -3.537356 | 4.648187  | -1.753088 |
| H | -5.905818 | 3.963095  | -1.379551 |
| H | -6.396488 | 1.709019  | -0.601642 |
| H | -6.735940 | -0.187986 | -0.406387 |
| H | -7.083929 | -2.595000 | -0.476980 |
| H | 1.683625  | -3.514690 | -2.483593 |
| H | 1.199554  | -1.441692 | -1.288641 |

**PPP (C4)**

$E = -1506.010324$  Hartree

| Symbol | X         | Y         | Z         |
|--------|-----------|-----------|-----------|
| C      | -0.808521 | 2.944958  | -1.029564 |
| C      | 0.425372  | 2.482523  | -0.631214 |
| C      | 0.629033  | 1.124156  | -0.289465 |
| C      | -0.454712 | 0.222539  | -0.405286 |
| C      | 2.272560  | -0.694693 | -0.287963 |
| C      | 1.187935  | -1.642587 | -0.467848 |
| C      | -0.153511 | -1.183040 | -0.582118 |
| C      | 1.398805  | -3.040063 | -0.445721 |
| C      | 0.386515  | -3.933394 | -0.713196 |
| C      | -0.884897 | -3.457716 | -1.050127 |
| C      | -1.143298 | -2.110026 | -0.967300 |
| C      | -1.758419 | 0.803790  | -0.468391 |
| C      | -3.073213 | 0.257606  | -0.118947 |
| N      | -4.045019 | 1.033822  | -0.626585 |
| B      | -3.476708 | 2.431434  | -1.195087 |
| C      | -1.934273 | 2.127162  | -0.896570 |
| C      | -3.428711 | -0.798195 | 0.776346  |
| C      | -4.807129 | -1.143805 | 0.889205  |
| C      | -5.765930 | -0.374239 | 0.185864  |
| C      | -5.356591 | 0.723527  | -0.505328 |
| C      | -2.494886 | -1.454496 | 1.608795  |
| C      | -2.896756 | -2.451628 | 2.459734  |
| C      | -4.247404 | -2.848781 | 2.508440  |
| C      | -5.185287 | -2.202394 | 1.745256  |
| C      | -3.786371 | 2.570573  | -2.783106 |
| C      | -4.123383 | 3.628231  | -0.307206 |
| C      | 1.959233  | 0.626191  | 0.009837  |
| C      | 5.407373  | -2.364957 | -1.578820 |
| C      | 4.079414  | -2.103146 | -1.320177 |
| C      | 3.678212  | -1.032677 | -0.491708 |



---

|   |           |           |           |
|---|-----------|-----------|-----------|
| C | 4.688700  | -0.167759 | 0.000573  |
| C | 6.037257  | -0.463470 | -0.266163 |
| C | 6.400793  | -1.553671 | -1.025642 |
| C | 2.954323  | 1.453653  | 0.676057  |
| C | 4.303478  | 1.025797  | 0.730716  |
| C | 2.584910  | 2.587078  | 1.432019  |
| C | 3.508536  | 3.299356  | 2.164871  |
| C | 4.846194  | 2.894672  | 2.184062  |
| C | 5.226673  | 1.767959  | 1.488044  |
| H | -0.908897 | 3.957866  | -1.400736 |
| H | 1.279030  | 3.142793  | -0.666528 |
| H | 2.373009  | -3.422058 | -0.188436 |
| H | 0.584195  | -4.996833 | -0.682476 |
| H | -1.668517 | -4.142653 | -1.345598 |
| H | -2.131550 | -1.754701 | -1.207876 |
| H | -6.816159 | -0.620114 | 0.250691  |
| H | -6.044983 | 1.404507  | -0.983098 |
| H | -4.546360 | -3.650551 | 3.170748  |
| H | -6.231194 | -2.473546 | 1.807535  |
| H | -3.326752 | 3.480076  | -3.181527 |
| H | -4.861635 | 2.644536  | -2.979862 |
| H | -3.399494 | 1.729029  | -3.365946 |
| H | -3.659340 | 4.580465  | -0.582339 |
| H | -3.969433 | 3.491214  | 0.767812  |
| H | -5.199812 | 3.738188  | -0.476169 |
| H | 5.673690  | -3.184919 | -2.232989 |
| H | 3.333228  | -2.702424 | -1.814566 |
| H | 1.547864  | 2.878734  | 1.479936  |
| H | 3.189167  | 4.155080  | 2.745190  |
| H | 5.574942  | 3.443744  | 2.765790  |
| H | 6.252923  | 1.437608  | 1.552770  |
| H | 7.445554  | -1.752820 | -1.224835 |
| H | 6.809415  | 0.198008  | 0.097945  |
| H | -2.171780 | -2.936155 | 3.099680  |
| H | -1.460568 | -1.153187 | 1.588657  |

### **EH3**

*PMM (C1)*

*E* = -1659.730665 Hartree

| Symbol | X         | Y         | Z         |
|--------|-----------|-----------|-----------|
| C      | 0.471919  | 3.497565  | -0.624094 |
| C      | -0.756906 | 2.895274  | -0.447095 |
| C      | -0.877594 | 1.612180  | 0.133748  |
| C      | 0.312910  | 0.898523  | 0.431924  |
| C      | -2.160957 | -0.446444 | 0.453404  |
| C      | -1.031421 | -1.031193 | 1.150481  |
| C      | 0.188345  | -0.316596 | 1.205622  |
| C      | -1.156666 | -2.200734 | 1.926555  |
| C      | -0.122535 | -2.647055 | 2.721009  |
| C      | 1.070207  | -1.920540 | 2.794328  |

---

|   |           |           |           |
|---|-----------|-----------|-----------|
| C | 1.210033  | -0.765937 | 2.057106  |
| C | 1.543982  | 1.442856  | -0.006492 |
| C | 2.867119  | 0.811925  | -0.118300 |
| N | 3.811429  | 1.778553  | -0.152665 |
| B | 3.183685  | 3.236993  | -0.470418 |
| C | 1.650759  | 2.786096  | -0.394038 |
| C | 3.267175  | -0.547332 | -0.251568 |
| C | 4.627165  | -0.836330 | 0.037797  |
| C | 5.549974  | 0.221909  | 0.163001  |
| C | 5.120833  | 1.504207  | -0.028280 |
| C | 2.411652  | -1.629668 | -0.691677 |
| C | 2.863169  | -2.966794 | -0.524631 |
| C | 4.181432  | -3.212346 | -0.033384 |
| C | 5.047941  | -2.193579 | 0.180499  |
| C | 1.194440  | -1.428582 | -1.368966 |
| C | 0.415706  | -2.489715 | -1.771363 |
| C | 0.819393  | -3.806654 | -1.514014 |
| C | 2.034799  | -4.037335 | -0.912651 |
| C | 3.705770  | 3.678128  | -1.943902 |
| C | 3.577975  | 4.294276  | 0.695683  |
| C | -2.159359 | 0.933717  | 0.268513  |
| C | -4.189721 | -3.300906 | -0.910858 |
| C | -3.158851 | -2.593035 | -0.332895 |
| C | -3.286232 | -1.220277 | -0.033003 |
| C | -4.493237 | -0.563570 | -0.379024 |
| C | -5.530324 | -1.309174 | -0.965904 |
| C | -5.392067 | -2.657066 | -1.219602 |
| C | -3.447767 | 1.605942  | 0.194247  |
| C | -4.614573 | 0.858369  | -0.111182 |
| C | -3.604921 | 2.956282  | 0.571346  |
| C | -4.840272 | 3.566773  | 0.576457  |
| C | -5.978032 | 2.843861  | 0.207850  |
| C | -5.860970 | 1.508766  | -0.112870 |
| H | 0.515366  | 4.513969  | -0.997961 |
| H | -1.642718 | 3.415787  | -0.772932 |
| H | -2.098596 | -2.726482 | 1.947887  |
| H | -0.253403 | -3.538353 | 3.320746  |
| H | 1.868679  | -2.246573 | 3.447614  |
| H | 2.112223  | -0.180812 | 2.152675  |
| H | 6.593525  | 0.014109  | 0.350418  |
| H | 5.790150  | 2.351057  | -0.060598 |
| H | 4.497153  | -4.239280 | 0.101973  |
| H | 6.073434  | -2.385868 | 0.467598  |
| H | 0.866671  | -0.425992 | -1.590197 |
| H | -0.517246 | -2.300976 | -2.285512 |
| H | 0.191017  | -4.635247 | -1.812800 |
| H | 2.385802  | -5.049026 | -0.752437 |
| H | 3.213452  | 4.607720  | -2.246487 |
| H | 4.784404  | 3.867840  | -1.961976 |

---

|   |           |           |           |
|---|-----------|-----------|-----------|
| H | 3.488131  | 2.930172  | -2.712840 |
| H | 3.084020  | 5.254396  | 0.517760  |
| H | 3.279955  | 3.957067  | 1.693382  |
| H | 4.655368  | 4.492072  | 0.721108  |
| H | -4.056949 | -4.348848 | -1.146269 |
| H | -2.217064 | -3.087997 | -0.154731 |
| H | -2.749268 | 3.512277  | 0.919620  |
| H | -4.927548 | 4.599067  | 0.889241  |
| H | -6.950998 | 3.317386  | 0.209999  |
| H | -6.755644 | 0.945497  | -0.334538 |
| H | -6.202238 | -3.206578 | -1.680700 |
| H | -6.447859 | -0.815947 | -1.251958 |

**PMP (C2)**

*E* = -1659.713823 Hartree

| Symbol | X         | Y         | Z         |
|--------|-----------|-----------|-----------|
| C      | -0.405901 | 3.419550  | 0.545661  |
| C      | 0.794947  | 2.746192  | 0.547051  |
| C      | 0.928813  | 1.462922  | -0.033912 |
| C      | -0.251024 | 0.781614  | -0.427388 |
| C      | 2.288861  | -0.563128 | -0.431198 |
| C      | 1.063963  | -1.273753 | -0.772201 |
| C      | -0.120165 | -0.528356 | -1.014747 |
| C      | 0.950607  | -2.676565 | -0.901897 |
| C      | -0.139729 | -3.264243 | -1.503524 |
| C      | -1.161066 | -2.467154 | -2.031369 |
| C      | -1.157973 | -1.120569 | -1.755871 |
| C      | -1.502617 | 1.403566  | -0.152843 |
| C      | -2.873899 | 0.859819  | -0.120525 |
| N      | -3.748351 | 1.878261  | -0.294173 |
| B      | -3.069857 | 3.316038  | -0.006650 |
| C      | -1.577095 | 2.769769  | 0.153483  |
| C      | -3.393862 | -0.439594 | 0.150567  |
| C      | -4.740156 | -0.675345 | -0.238136 |
| C      | -5.558450 | 0.408577  | -0.614822 |
| C      | -5.053394 | 1.674065  | -0.536840 |
| C      | -2.681496 | -1.498018 | 0.836251  |
| C      | -3.247265 | -2.802508 | 0.857620  |
| C      | -4.527973 | -3.029884 | 0.270422  |
| C      | -5.265744 | -2.002802 | -0.212905 |
| C      | -1.499674 | -1.286018 | 1.570499  |
| C      | -0.865397 | -2.320838 | 2.220076  |
| C      | -1.385784 | -3.620258 | 2.170323  |
| C      | -2.568486 | -3.849945 | 1.507510  |
| C      | -3.745584 | 3.905123  | 1.348030  |
| C      | -3.230001 | 4.300433  | -1.286792 |
| C      | 2.221168  | 0.808367  | -0.178990 |
| C      | 5.056434  | -3.138830 | -0.776232 |
| C      | 3.869592  | -2.471054 | -0.990468 |

---

|   |           |           |           |
|---|-----------|-----------|-----------|
| C | 3.595596  | -1.220914 | -0.395460 |
| C | 4.680674  | -0.566857 | 0.246818  |
| C | 5.854778  | -1.293062 | 0.517426  |
| C | 6.034035  | -2.574918 | 0.046693  |
| C | 3.458732  | 1.559516  | -0.008287 |
| C | 4.627200  | 0.876348  | 0.404585  |
| C | 3.563960  | 2.939692  | -0.277271 |
| C | 4.709053  | 3.648639  | 0.013337  |
| C | 5.800620  | 2.995247  | 0.592776  |
| C | 5.763842  | 1.628120  | 0.757942  |
| H | -0.446068 | 4.440734  | 0.906533  |
| H | 1.653888  | 3.218930  | 0.992338  |
| H | 1.718519  | -3.314301 | -0.501224 |
| H | -0.190778 | -4.342028 | -1.583570 |
| H | -1.974899 | -2.909737 | -2.589823 |
| H | -1.983029 | -0.506335 | -2.082094 |
| H | -6.590137 | 0.242793  | -0.889403 |
| H | -5.654683 | 2.559764  | -0.679195 |
| H | -4.925342 | -4.037217 | 0.275105  |
| H | -6.270069 | -2.163889 | -0.582053 |
| H | -1.087742 | -0.293273 | 1.643694  |
| H | 0.044066  | -2.123995 | 2.772139  |
| H | -0.871777 | -4.430881 | 2.669658  |
| H | -3.007652 | -4.839628 | 1.493280  |
| H | -3.226278 | 4.819998  | 1.650522  |
| H | -4.799138 | 4.168666  | 1.206101  |
| H | -3.689290 | 3.206591  | 2.188869  |
| H | -4.278846 | 4.556618  | -1.473705 |
| H | -2.700731 | 5.241833  | -1.110562 |
| H | -2.825619 | 3.868891  | -2.207721 |
| H | 5.226672  | -4.095638 | -1.252254 |
| H | 3.154607  | -2.908253 | -1.664538 |
| H | 2.739384  | 3.450181  | -0.748861 |
| H | 4.761482  | 4.705288  | -0.213732 |
| H | 6.692467  | 3.548226  | 0.856896  |
| H | 6.650966  | 1.126862  | 1.114598  |
| H | 6.657177  | -0.825829 | 1.068403  |
| H | 6.949773  | -3.110084 | 0.260707  |

**PPM (C3)**

$E = -1659.724981$  Hartree

| Symbol | X         | Y         | Z        |
|--------|-----------|-----------|----------|
| C      | 0.782026  | 3.512901  | 0.548947 |
| C      | -0.492870 | 2.987872  | 0.536468 |
| C      | -0.720576 | 1.593524  | 0.461983 |
| C      | 0.405974  | 0.743437  | 0.578376 |
| C      | -2.208232 | -0.354089 | 0.650664 |
| C      | -1.124868 | -1.041584 | 1.334794 |
| C      | 0.194833  | -0.544280 | 1.204831 |

---

|   |           |           |           |
|---|-----------|-----------|-----------|
| C | -1.341733 | -2.133978 | 2.198132  |
| C | -0.300541 | -2.767244 | 2.840897  |
| C | 1.007922  | -2.307917 | 2.665117  |
| C | 1.239804  | -1.200835 | 1.881650  |
| C | 1.674928  | 1.299997  | 0.267111  |
| C | 2.930793  | 0.629546  | -0.090583 |
| N | 3.952077  | 1.504450  | 0.048526  |
| B | 3.445281  | 3.025769  | 0.244526  |
| C | 1.886503  | 2.683306  | 0.330938  |
| C | 3.203094  | -0.687725 | -0.558462 |
| C | 4.550217  | -1.127051 | -0.462123 |
| C | 5.568456  | -0.190902 | -0.190425 |
| C | 5.238473  | 1.122680  | -0.020964 |
| C | 2.220917  | -1.599004 | -1.110727 |
| C | 2.557544  | -2.974834 | -1.224899 |
| C | 3.889063  | -3.403921 | -0.937746 |
| C | 4.860674  | -2.509932 | -0.636606 |
| C | 0.976704  | -1.186037 | -1.622924 |
| C | 0.062913  | -2.095120 | -2.105072 |
| C | 0.357259  | -3.465803 | -2.108583 |
| C | 1.596953  | -3.892618 | -1.693827 |
| C | 3.891970  | 3.867021  | -1.072110 |
| C | 4.029670  | 3.639903  | 1.628688  |
| C | -2.034255 | 0.980055  | 0.295877  |
| C | -4.802821 | -3.043202 | 0.145853  |
| C | -3.584479 | -2.425146 | 0.316137  |
| C | -3.468514 | -1.019949 | 0.373593  |
| C | -4.621768 | -0.244339 | 0.101564  |
| C | -5.863971 | -0.897667 | -0.017085 |
| C | -5.962614 | -2.270487 | 0.026417  |
| C | -3.152275 | 1.710224  | -0.290085 |
| C | -4.461371 | 1.165004  | -0.210774 |
| C | -2.998495 | 2.931022  | -0.982676 |
| C | -4.080732 | 3.667602  | -1.410140 |
| C | -5.376796 | 3.205621  | -1.164605 |
| C | -5.554390 | 1.962505  | -0.600318 |
| H | 0.919494  | 4.577754  | 0.694369  |
| H | -1.335535 | 3.651042  | 0.652087  |
| H | -2.350149 | -2.459758 | 2.396756  |
| H | -0.503299 | -3.595903 | 3.506705  |
| H | 1.829558  | -2.783815 | 3.184083  |
| H | 2.238127  | -0.796909 | 1.834199  |
| H | 6.601211  | -0.506310 | -0.153930 |
| H | 5.974034  | 1.903456  | 0.103120  |
| H | 4.121058  | -4.457678 | -1.028608 |
| H | 5.886643  | -2.826792 | -0.503048 |
| H | 0.733010  | -0.137238 | -1.649814 |

---

|   |           |           |           |
|---|-----------|-----------|-----------|
| H | -0.888718 | -1.745196 | -2.482585 |
| H | -0.374406 | -4.177388 | -2.467590 |
| H | 1.863584  | -4.940761 | -1.745987 |
| H | 3.477152  | 4.878580  | -1.023306 |
| H | 4.979935  | 3.970648  | -1.146293 |
| H | 3.538236  | 3.415272  | -2.004264 |
| H | 3.610924  | 4.635225  | 1.806102  |
| H | 3.785803  | 3.026048  | 2.501376  |
| H | 5.118767  | 3.755072  | 1.598359  |
| H | -4.858372 | -4.122866 | 0.097698  |
| H | -2.694310 | -3.030574 | 0.379602  |
| H | -2.009928 | 3.289295  | -1.214351 |
| H | -3.922558 | 4.598132  | -1.939377 |
| H | -6.234915 | 3.793914  | -1.462006 |
| H | -6.559380 | 1.584069  | -0.490626 |
| H | -6.760737 | -0.321974 | -0.189130 |
| H | -6.928510 | -2.746686 | -0.079683 |

**PPP (C4)**

$E = -1659.723584$  Hartree

| Symbol | X         | Y         | Z         |
|--------|-----------|-----------|-----------|
| C      | -0.484238 | 3.419642  | -0.591690 |
| C      | 0.722808  | 2.814866  | -0.330706 |
| C      | 0.842936  | 1.405178  | -0.273373 |
| C      | -0.294760 | 0.611857  | -0.552875 |
| C      | 2.363383  | -0.491317 | -0.592161 |
| C      | 1.220553  | -1.322269 | -0.918357 |
| C      | -0.085109 | -0.760503 | -0.959125 |
| C      | 1.338417  | -2.718392 | -1.102057 |
| C      | 0.268409  | -3.493919 | -1.484795 |
| C      | -0.965243 | -2.888540 | -1.746765 |
| C      | -1.130071 | -1.551402 | -1.476539 |
| C      | -1.562590 | 1.266218  | -0.461142 |
| C      | -2.916507 | 0.729412  | -0.238590 |
| N      | -3.825551 | 1.657071  | -0.619701 |
| B      | -3.170672 | 3.114732  | -0.820771 |
| C      | -1.656533 | 2.657566  | -0.602746 |
| C      | -3.384916 | -0.484169 | 0.345526  |
| C      | -4.741632 | -0.826020 | 0.097422  |
| C      | -5.612815 | 0.134150  | -0.454160 |
| C      | -5.137024 | 1.385547  | -0.718159 |
| C      | -2.593507 | -1.375061 | 1.169117  |
| C      | -3.090486 | -2.679294 | 1.438215  |
| C      | -4.401006 | -3.042036 | 1.003885  |
| C      | -5.215232 | -2.135594 | 0.413740  |
| C      | -1.388942 | -0.994114 | 1.788888  |
| C      | -0.655617 | -1.886043 | 2.537791  |
| C      | -1.100900 | -3.203487 | 2.713434  |

---

|   |           |           |           |
|---|-----------|-----------|-----------|
| C | -2.312562 | -3.583721 | 2.185993  |
| C | -3.443343 | 3.664218  | -2.323775 |
| C | -3.770680 | 4.084712  | 0.337153  |
| C | 2.135913  | 0.778111  | -0.073935 |
| C | 5.382059  | -2.130377 | -2.164867 |
| C | 4.073869  | -1.829440 | -1.853443 |
| C | 3.743648  | -0.884209 | -0.858225 |
| C | 4.807823  | -0.180947 | -0.238772 |
| C | 6.134339  | -0.513744 | -0.565285 |
| C | 6.425988  | -1.484888 | -1.497849 |
| C | 3.179821  | 1.406125  | 0.724274  |
| C | 4.498847  | 0.890513  | 0.690039  |
| C | 2.881470  | 2.402461  | 1.678780  |
| C | 3.846796  | 2.911081  | 2.519746  |
| C | 5.156817  | 2.429270  | 2.450670  |
| C | 5.466096  | 1.425435  | 1.558830  |
| H | -0.528290 | 4.491154  | -0.745801 |
| H | 1.616108  | 3.416301  | -0.253451 |
| H | 2.284214  | -3.197205 | -0.907683 |
| H | 0.391257  | -4.562571 | -1.602291 |
| H | -1.793207 | -3.469471 | -2.130767 |
| H | -2.088434 | -1.098531 | -1.665652 |
| H | -6.653889 | -0.104525 | -0.616870 |
| H | -5.767854 | 2.200550  | -1.040564 |
| H | -4.753320 | -4.044674 | 1.211499  |
| H | -6.236340 | -2.386989 | 0.158834  |
| H | -1.034308 | 0.017557  | 1.687866  |
| H | 0.269878  | -1.562686 | 2.995591  |
| H | -0.509442 | -3.904928 | 3.286756  |
| H | -2.698508 | -4.580752 | 2.357477  |
| H | -2.922360 | 4.613617  | -2.480536 |
| H | -4.507789 | 3.853438  | -2.501514 |
| H | -3.096162 | 2.972485  | -3.097578 |
| H | -3.263342 | 5.053981  | 0.305909  |
| H | -3.633385 | 3.678301  | 1.344182  |
| H | -4.839998 | 4.279402  | 0.201610  |
| H | 5.594938  | -2.848639 | -2.945902 |
| H | 3.289343  | -2.291928 | -2.429042 |
| H | 1.864644  | 2.743080  | 1.791079  |
| H | 3.580113  | 3.663887  | 3.249986  |
| H | 5.918047  | 2.817902  | 3.114349  |
| H | 6.468998  | 1.024654  | 1.552945  |
| H | 7.455595  | -1.714886 | -1.738508 |
| H | 6.948028  | 0.027045  | -0.104837 |

---

**Cartesian coordinates (B3LYP-D3(BJ)/def2-SVP, CH<sub>2</sub>Cl<sub>2</sub>, PCM model)****Inversion of EH1****EH1***PMM (C1)**E* = -1350.872062 Hartree

| Symbol | X         | Y         | Z         |
|--------|-----------|-----------|-----------|
| C      | 1.607612  | 2.694736  | -0.209684 |
| C      | 0.272891  | 2.337636  | -0.100767 |
| C      | -0.124862 | 1.012364  | 0.219269  |
| C      | 0.887966  | 0.014811  | 0.361622  |
| C      | -1.841100 | -0.745981 | 0.105078  |
| C      | -0.878026 | -1.703082 | 0.638831  |
| C      | 0.468183  | -1.288634 | 0.856048  |
| C      | -1.285207 | -2.958335 | 1.157879  |
| C      | -0.413559 | -3.762558 | 1.876288  |
| C      | 0.896914  | -3.325448 | 2.133101  |
| C      | 1.317653  | -2.100371 | 1.640051  |
| C      | 2.232373  | 0.376899  | 0.057057  |
| C      | 3.393418  | -0.486071 | -0.231053 |
| N      | 4.513459  | 0.272891  | -0.402250 |
| B      | 4.198776  | 1.860525  | -0.348978 |
| C      | 2.612640  | 1.718864  | -0.144208 |
| C      | 3.473917  | -1.868649 | -0.466675 |
| C      | 4.700304  | -2.440253 | -0.789412 |
| C      | 5.845704  | -1.638542 | -0.879949 |
| C      | 5.701657  | -0.271278 | -0.694376 |
| C      | 4.640336  | 2.523812  | -1.767776 |
| C      | 4.953711  | 2.516842  | 0.936618  |
| C      | -1.532586 | 0.614197  | 0.232750  |
| C      | -4.471730 | -2.734726 | -1.744889 |
| C      | -3.299212 | -2.406821 | -1.082833 |
| C      | -3.111937 | -1.130254 | -0.494349 |
| C      | -4.147785 | -0.161638 | -0.636359 |
| C      | -5.334474 | -0.522408 | -1.313266 |
| C      | -5.505500 | -1.788857 | -1.850453 |
| C      | -2.642964 | 1.557103  | 0.349155  |
| C      | -3.949961 | 1.167019  | -0.069188 |
| C      | -2.499258 | 2.804803  | 1.008453  |
| C      | -3.571846 | 3.665462  | 1.180909  |
| C      | -4.842980 | 3.306154  | 0.703381  |
| C      | -5.023699 | 2.069483  | 0.104478  |
| H      | 1.868651  | 3.735478  | -0.421912 |
| H      | -0.487421 | 3.089015  | -0.301597 |
| H      | -2.322920 | -3.270308 | 1.054099  |
| H      | -0.765678 | -4.713148 | 2.283291  |
| H      | 1.570907  | -3.929653 | 2.744321  |
| H      | 2.313267  | -1.736080 | 1.891876  |
| H      | 6.822709  | -2.059142 | -1.118513 |
| H      | 6.535988  | 0.424379  | -0.799084 |
| H      | 4.321191  | 3.580571  | -1.799835 |



---

|   |           |           |           |
|---|-----------|-----------|-----------|
| H | 5.735951  | 2.518851  | -1.912347 |
| H | 4.185949  | 2.020094  | -2.639069 |
| H | 4.681127  | 3.582114  | 1.035518  |
| H | 4.690702  | 2.022494  | 1.888212  |
| H | 6.053187  | 2.475217  | 0.830314  |
| H | -4.579236 | -3.721010 | -2.201971 |
| H | -2.486977 | -3.131383 | -1.058644 |
| H | -1.537004 | 3.075387  | 1.438105  |
| H | -3.428034 | 4.611326  | 1.708011  |
| H | -5.692831 | 3.979748  | 0.833981  |
| H | -6.026553 | 1.778231  | -0.207640 |
| H | -6.429983 | -2.038885 | -2.375685 |
| H | -6.127401 | 0.214501  | -1.440871 |
| H | 2.580423  | -2.483963 | -0.408579 |
| H | 4.764331  | -3.514364 | -0.975726 |

*PMP (C2)*

*E* = -1350.855543 Hartree

| Symbol | X         | Y         | Z         |
|--------|-----------|-----------|-----------|
| C      | -1.641348 | -2.649210 | -0.130665 |
| C      | -0.310033 | -2.276523 | -0.178690 |
| C      | 0.111208  | -0.949262 | 0.107846  |
| C      | -0.888726 | 0.052006  | 0.290661  |
| C      | 1.909001  | 0.768947  | 0.063520  |
| C      | 0.874535  | 1.796403  | 0.198229  |
| C      | -0.446667 | 1.403820  | 0.577793  |
| C      | 1.083541  | 3.193290  | 0.034329  |
| C      | 0.180750  | 4.130538  | 0.512284  |
| C      | -0.974779 | 3.706937  | 1.192509  |
| C      | -1.291656 | 2.359367  | 1.187964  |
| C      | -2.258842 | -0.326614 | 0.112059  |
| C      | -3.451961 | 0.498418  | -0.175899 |
| N      | -4.575845 | -0.275450 | -0.159792 |
| B      | -4.238039 | -1.848278 | 0.001174  |
| C      | -2.642270 | -1.679368 | 0.025161  |
| C      | -3.571196 | 1.834981  | -0.594628 |
| C      | -4.827284 | 2.360731  | -0.877387 |
| C      | -5.969434 | 1.559855  | -0.748826 |
| C      | -5.792264 | 0.227760  | -0.406324 |
| C      | -4.818128 | -2.637153 | -1.298295 |
| C      | -4.837803 | -2.395389 | 1.413727  |
| C      | 1.525846  | -0.580305 | 0.147494  |
| C      | 5.210904  | 2.672806  | -0.182767 |
| C      | 3.904299  | 2.362953  | 0.163309  |
| C      | 3.335503  | 1.088835  | -0.095125 |
| C      | 4.235557  | 0.061059  | -0.514425 |
| C      | 5.541255  | 0.412435  | -0.927707 |
| C      | 6.019743  | 1.706011  | -0.800019 |
| C      | 2.560881  | -1.612797 | 0.215063  |

---

|   |           |           |           |
|---|-----------|-----------|-----------|
| C | 3.855004  | -1.331302 | -0.304080 |
| C | 2.348482  | -2.881177 | 0.811810  |
| C | 3.302346  | -3.884501 | 0.749527  |
| C | 4.515934  | -3.651319 | 0.080852  |
| C | 4.791677  | -2.386358 | -0.412389 |
| H | -1.914609 | -3.694836 | -0.298553 |
| H | 0.429238  | -3.022656 | -0.457049 |
| H | 1.967328  | 3.548937  | -0.484888 |
| H | 0.388095  | 5.195094  | 0.382345  |
| H | -1.640327 | 4.430042  | 1.668725  |
| H | -2.221402 | 2.020239  | 1.643896  |
| H | -6.968690 | 1.947553  | -0.947480 |
| H | -6.623204 | -0.477547 | -0.351102 |
| H | -4.481176 | -3.688702 | -1.276110 |
| H | -5.922726 | -2.659309 | -1.321027 |
| H | -4.472819 | -2.205172 | -2.254110 |
| H | -5.942777 | -2.365908 | 1.424762  |
| H | -4.543263 | -3.447271 | 1.573662  |
| H | -4.479216 | -1.819337 | 2.284704  |
| H | 5.605491  | 3.668060  | 0.033970  |
| H | 3.322947  | 3.116820  | 0.683009  |
| H | 1.425519  | -3.065748 | 1.358024  |
| H | 3.110601  | -4.848121 | 1.226653  |
| H | 5.262648  | -4.444192 | -0.002132 |
| H | 5.774300  | -2.196900 | -0.842890 |
| H | 6.207297  | -0.356926 | -1.317303 |
| H | 7.034837  | 1.950709  | -1.120383 |
| H | -4.916479 | 3.398619  | -1.205180 |
| H | -2.684966 | 2.450852  | -0.710339 |

**PPM (C3)**

$E = -1350.866652$  Hartree

| Symbol | X         | Y         | Z         |
|--------|-----------|-----------|-----------|
| C      | 1.771122  | 2.400698  | 1.073982  |
| C      | 0.415554  | 2.124607  | 0.984580  |
| C      | -0.067698 | 0.881514  | 0.491404  |
| C      | 0.884706  | -0.158480 | 0.284788  |
| C      | -1.919518 | -0.721917 | 0.155443  |
| C      | -0.985319 | -1.784415 | 0.523931  |
| C      | 0.417153  | -1.524183 | 0.484683  |
| C      | -1.416409 | -3.036422 | 1.029655  |
| C      | -0.519856 | -4.022884 | 1.408503  |
| C      | 0.860603  | -3.778638 | 1.328804  |
| C      | 1.310822  | -2.541438 | 0.900057  |
| C      | 2.250268  | 0.231550  | 0.135104  |
| C      | 3.351661  | -0.490627 | -0.514102 |
| N      | 4.513920  | 0.211234  | -0.394605 |
| B      | 4.299576  | 1.630903  | 0.359478  |
| C      | 2.709916  | 1.493573  | 0.553951  |

---

|   |           |           |           |
|---|-----------|-----------|-----------|
| C | 3.336746  | -1.660225 | -1.291716 |
| C | 4.518395  | -2.111071 | -1.869611 |
| C | 5.709157  | -1.396459 | -1.676704 |
| C | 5.658486  | -0.222795 | -0.938217 |
| C | 4.750555  | 2.826186  | -0.648668 |
| C | 5.122963  | 1.619659  | 1.764425  |
| C | -1.480016 | 0.606185  | 0.214658  |
| C | -5.050910 | -2.585365 | -0.901355 |
| C | -3.717981 | -2.294225 | -0.662976 |
| C | -3.301835 | -1.015568 | -0.210798 |
| C | -4.278060 | 0.020472  | -0.151920 |
| C | -5.639184 | -0.313207 | -0.350778 |
| C | -6.028418 | -1.596435 | -0.696918 |
| C | -2.432505 | 1.686662  | -0.050690 |
| C | -3.832153 | 1.405493  | -0.050549 |
| C | -2.033807 | 3.014944  | -0.352573 |
| C | -2.949832 | 4.047579  | -0.468643 |
| C | -4.319481 | 3.788906  | -0.294241 |
| C | -4.746296 | 2.483760  | -0.115782 |
| H | 2.100534  | 3.349223  | 1.507187  |
| H | -0.298657 | 2.863008  | 1.343484  |
| H | -2.479320 | -3.216756 | 1.172841  |
| H | -0.891046 | -4.970229 | 1.805842  |
| H | 1.576918  | -4.535134 | 1.656945  |
| H | 2.375808  | -2.326355 | 0.955742  |
| H | 6.652390  | -1.729495 | -2.109998 |
| H | 6.535693  | 0.406903  | -0.779845 |
| H | 4.504964  | 3.804684  | -0.199646 |
| H | 5.839230  | 2.827258  | -0.838983 |
| H | 4.240493  | 2.779825  | -1.626948 |
| H | 4.916227  | 2.542878  | 2.333633  |
| H | 4.853277  | 0.768438  | 2.413784  |
| H | 6.215219  | 1.582350  | 1.599198  |
| H | -5.336129 | -3.579005 | -1.254195 |
| H | -2.970918 | -3.061904 | -0.853441 |
| H | -0.983551 | 3.232347  | -0.527231 |
| H | -2.603110 | 5.056545  | -0.702907 |
| H | -5.048549 | 4.600422  | -0.348784 |
| H | -5.816531 | 2.288092  | -0.062272 |
| H | -6.403568 | 0.458756  | -0.270949 |
| H | -7.085374 | -1.822677 | -0.854217 |
| H | 4.514261  | -3.018632 | -2.476885 |
| H | 2.403448  | -2.198307 | -1.443877 |

**PPP (C4)**

$E = -1350.865163$  Hartree

| Symbol | X         | Y         | Z        |
|--------|-----------|-----------|----------|
| C      | -1.629242 | -2.311902 | 1.244522 |
| C      | -0.308441 | -2.060814 | 0.919536 |

---

|   |           |           |           |
|---|-----------|-----------|-----------|
| C | 0.095354  | -0.825666 | 0.338680  |
| C | -0.872431 | 0.207264  | 0.187027  |
| C | 1.969652  | 0.748736  | 0.038452  |
| C | 1.005797  | 1.835399  | -0.078869 |
| C | -0.394037 | 1.575681  | 0.062118  |
| C | 1.397535  | 3.161514  | -0.406388 |
| C | 0.499188  | 4.214527  | -0.400649 |
| C | -0.835418 | 3.984797  | -0.022073 |
| C | -1.264431 | 2.687071  | 0.191853  |
| C | -2.249308 | -0.194977 | 0.248693  |
| C | -3.443013 | 0.423088  | -0.353705 |
| N | -4.568112 | -0.248399 | 0.025137  |
| B | -4.230013 | -1.560796 | 0.909018  |
| C | -2.631631 | -1.414247 | 0.837831  |
| C | -3.557279 | 1.434435  | -1.323455 |
| C | -4.813365 | 1.786639  | -1.804532 |
| C | -5.956467 | 1.131953  | -1.325755 |
| C | -5.783775 | 0.097275  | -0.418137 |
| C | -4.820533 | -1.368942 | 2.414848  |
| C | -4.822824 | -2.867951 | 0.142148  |
| C | 1.496650  | -0.568293 | 0.030104  |
| C | 5.258375  | 2.323867  | 1.108048  |
| C | 3.910437  | 2.157884  | 0.830886  |
| C | 3.403563  | 0.962907  | 0.256776  |
| C | 4.319006  | -0.111699 | 0.053383  |
| C | 5.690636  | 0.086587  | 0.330865  |
| C | 6.164780  | 1.288015  | 0.832118  |
| C | 2.409419  | -1.642136 | -0.362295 |
| C | 3.812546  | -1.398798 | -0.406126 |
| C | 1.931630  | -2.877312 | -0.872236 |
| C | 2.794123  | -3.852725 | -1.346295 |
| C | 4.180068  | -3.624937 | -1.342632 |
| C | 4.671769  | -2.410117 | -0.892295 |
| H | -1.894460 | -3.236998 | 1.763703  |
| H | 0.454807  | -2.795826 | 1.172557  |
| H | 2.428551  | 3.355315  | -0.692548 |
| H | 0.836718  | 5.219564  | -0.663293 |
| H | -1.534848 | 4.816777  | 0.085148  |
| H | -2.296161 | 2.518735  | 0.490308  |
| H | -6.955605 | 1.394384  | -1.673837 |
| H | -6.618582 | -0.497590 | -0.043661 |
| H | -4.521346 | -2.218135 | 3.053788  |
| H | -5.925444 | -1.337965 | 2.418277  |
| H | -4.458115 | -0.448094 | 2.904294  |
| H | -4.492175 | -3.784994 | 0.661034  |
| H | -4.480838 | -2.945357 | -0.904981 |
| H | -5.927747 | -2.887757 | 0.135393  |
| H | 5.605439  | 3.253832  | 1.564149  |
| H | 3.223740  | 2.951057  | 1.115041  |

---

|   |           |           |           |
|---|-----------|-----------|-----------|
| H | 0.859768  | -3.051365 | -0.940041 |
| H | 2.389745  | -4.786167 | -1.744212 |
| H | 4.866254  | -4.386298 | -1.720208 |
| H | 5.744965  | -2.227197 | -0.941915 |
| H | 7.228762  | 1.410759  | 1.046281  |
| H | 6.392636  | -0.733470 | 0.181910  |
| H | -2.665382 | 1.926830  | -1.702916 |
| H | -4.903840 | 2.569991  | -2.559983 |

### TS1

E = -1350.860029 Hartree

| Symbol | X         | Y         | Z         |
|--------|-----------|-----------|-----------|
| C      | -4.336787 | -2.891851 | -1.466847 |
| C      | -3.171194 | -2.448275 | -0.866901 |
| C      | -3.057810 | -1.130761 | -0.349066 |
| C      | -4.145452 | -0.240693 | -0.523952 |
| C      | -5.333125 | -0.720028 | -1.127842 |
| C      | -5.438316 | -2.024993 | -1.578597 |
| C      | -2.660986 | 1.660381  | 0.166934  |
| C      | -3.970555 | 1.149911  | -0.134888 |
| C      | -2.587403 | 3.067619  | 0.351435  |
| C      | -3.695781 | 3.899616  | 0.334055  |
| C      | -4.974034 | 3.369207  | 0.122608  |
| C      | -5.090877 | 2.012964  | -0.117187 |
| C      | 2.238433  | 0.381386  | 0.110389  |
| C      | 0.890891  | 0.044290  | 0.422575  |
| C      | -0.092312 | 1.089813  | 0.481054  |
| C      | 0.439486  | 2.403684  | 0.622041  |
| C      | 1.794169  | 2.692933  | 0.533544  |
| C      | 0.489028  | -1.279011 | 0.864955  |
| C      | -0.883383 | -1.617463 | 0.807341  |
| C      | -1.824199 | -0.651376 | 0.253558  |
| C      | -1.524140 | 0.723164  | 0.323004  |
| C      | -0.408803 | -3.683427 | 2.022654  |
| C      | 0.954903  | -3.344812 | 2.076751  |
| B      | 4.290343  | 1.776795  | -0.130653 |
| C      | 1.388472  | -2.152166 | 1.521841  |
| C      | -1.309927 | -2.827425 | 1.409308  |
| C      | 5.581210  | -0.343047 | -1.023529 |
| C      | 5.599209  | -1.659503 | -1.461084 |
| C      | 4.405188  | -2.391924 | -1.407222 |
| C      | 3.304190  | -0.487248 | -0.414187 |
| C      | 3.255179  | -1.808975 | -0.886181 |
| C      | 2.718481  | 1.699549  | 0.189090  |
| N      | 4.466135  | 0.214975  | -0.534216 |
| H      | -4.390106 | -3.906001 | -1.869084 |
| H      | -2.311668 | -3.114964 | -0.826485 |
| H      | -6.175973 | -0.047580 | -1.280956 |

---

|   |           |           |           |
|---|-----------|-----------|-----------|
| H | -6.362438 | -2.365556 | -2.050989 |
| H | -1.645696 | 3.559226  | 0.522995  |
| H | -3.558759 | 4.970819  | 0.498083  |
| H | -5.858954 | 4.008988  | 0.135746  |
| H | -6.081999 | 1.597660  | -0.293119 |
| H | -0.199218 | 3.241810  | 0.850977  |
| H | 2.122150  | 3.724680  | 0.688779  |
| H | -0.767014 | -4.599730 | 2.497170  |
| H | 1.664235  | -3.995805 | 2.592612  |
| H | 2.429994  | -1.856248 | 1.640951  |
| H | -2.372033 | -3.067368 | 1.435369  |
| H | 6.460498  | 0.301599  | -1.071703 |
| H | 6.518681  | -2.092179 | -1.855708 |
| H | 4.372959  | -3.418762 | -1.777390 |
| H | 2.321094  | -2.364408 | -0.848814 |
| C | 5.200216  | 2.095057  | 1.181851  |
| H | 6.280268  | 2.009088  | 0.962982  |
| H | 5.024147  | 3.129850  | 1.524388  |
| H | 4.976892  | 1.427169  | 2.032220  |
| C | 4.670220  | 2.691028  | -1.422058 |
| H | 4.447387  | 3.750994  | -1.206978 |
| H | 5.745011  | 2.636306  | -1.673742 |
| H | 4.100743  | 2.415870  | -2.327192 |

## TS2

$E = -1350.854290$  Hartree

| Symbol | X         | Y         | Z         |
|--------|-----------|-----------|-----------|
| C      | 1.318342  | 3.327837  | 0.126378  |
| C      | 0.373202  | 4.329138  | 0.284621  |
| C      | -0.970836 | 4.001331  | 0.494152  |
| C      | -1.327556 | 2.668067  | 0.458570  |
| C      | -3.403982 | 0.439267  | -0.426419 |
| N      | -4.532342 | -0.268908 | -0.136462 |
| B      | -4.220394 | -1.579063 | 0.762697  |
| C      | -3.481900 | 1.487554  | -1.359366 |
| C      | -4.713335 | 1.824427  | -1.909759 |
| C      | -5.865311 | 1.118727  | -1.534728 |
| C      | -5.725143 | 0.059669  | -0.649795 |
| C      | 5.578677  | 2.289947  | 0.207915  |
| C      | 4.204076  | 2.208287  | 0.042279  |
| C      | 5.703108  | -0.091128 | 0.251413  |
| C      | 6.344954  | 1.128734  | 0.353333  |
| C      | 1.493782  | -0.471561 | 0.099341  |
| C      | 2.003708  | 0.840387  | 0.040214  |
| C      | 3.484527  | 0.981883  | 0.010199  |
| C      | 4.309645  | -0.195574 | 0.037861  |
| C      | 3.730657  | -1.499475 | -0.244485 |
| C      | 2.321241  | -1.617024 | -0.271717 |

---

|   |           |           |           |
|---|-----------|-----------|-----------|
| C | 0.106337  | -0.740092 | 0.455514  |
| C | -0.868049 | 0.260179  | 0.243246  |
| C | -0.394181 | 1.632116  | 0.209249  |
| C | 1.011248  | 1.939227  | 0.122259  |
| C | -0.294950 | -1.963113 | 1.063931  |
| C | -1.627081 | -2.242884 | 1.311488  |
| C | -2.625578 | -1.387575 | 0.810340  |
| C | -2.237282 | -0.164625 | 0.234253  |
| C | 4.521793  | -2.623031 | -0.586068 |
| C | 3.945582  | -3.814270 | -0.993821 |
| C | 2.548172  | -3.905238 | -1.112425 |
| C | 1.757074  | -2.824220 | -0.763120 |
| H | 2.326896  | 3.679152  | 0.007163  |
| H | 0.698800  | 5.371749  | 0.278196  |
| H | -1.718176 | 4.771530  | 0.695786  |
| H | -2.357660 | 2.398144  | 0.676002  |
| H | -6.846189 | 1.366603  | -1.940631 |
| H | -6.567295 | -0.564947 | -0.346980 |
| H | 6.050531  | 3.274760  | 0.234776  |
| H | 3.709830  | 3.157611  | -0.062257 |
| H | 0.471843  | -2.670625 | 1.378481  |
| H | -1.900181 | -3.160155 | 1.840290  |
| H | 5.608155  | -2.547471 | -0.575824 |
| H | 4.579185  | -4.662067 | -1.263987 |
| H | 2.084633  | -4.815708 | -1.498663 |
| H | 0.680580  | -2.895114 | -0.905072 |
| C | -4.713409 | -2.898014 | -0.053055 |
| H | -4.400093 | -3.808609 | 0.487409  |
| H | -5.813334 | -2.947011 | -0.148085 |
| H | -4.287080 | -2.959989 | -1.069797 |
| C | -4.929333 | -1.413488 | 2.219612  |
| H | -6.031780 | -1.416854 | 2.139883  |
| H | -4.652567 | -2.256599 | 2.876460  |
| H | -4.633850 | -0.484571 | 2.737960  |
| H | 7.422394  | 1.179248  | 0.523649  |
| H | 6.293530  | -1.001997 | 0.337950  |
| H | -4.778303 | 2.636278  | -2.637225 |
| H | -2.580692 | 2.021527  | -1.652194 |

### TS3

$E = -1350.848385$  Hartree

| Symbol | X        | Y        | Z        |
|--------|----------|----------|----------|
| C      | 4.625025 | 2.282920 | 2.172598 |
| C      | 3.415141 | 2.120639 | 1.515892 |
| C      | 3.179212 | 1.018901 | 0.655084 |
| C      | 4.201810 | 0.033062 | 0.526746 |
| C      | 5.430255 | 0.228719 | 1.197257 |
| C      | 5.650909 | 1.339291 | 1.996884 |

---

|   |           |           |           |
|---|-----------|-----------|-----------|
| C | 2.601615  | -1.446974 | -0.664034 |
| C | 3.942034  | -1.156066 | -0.276909 |
| C | 2.366782  | -2.576818 | -1.488131 |
| C | 3.398900  | -3.414682 | -1.878870 |
| C | 4.714289  | -3.147003 | -1.462255 |
| C | 4.975446  | -2.029453 | -0.684646 |
| C | -2.269945 | -0.318822 | -0.185541 |
| C | -0.911192 | 0.122050  | -0.455778 |
| C | 0.120823  | -0.865534 | -0.325239 |
| C | -0.181770 | -2.185547 | 0.093346  |
| C | -1.456081 | -2.531021 | 0.481735  |
| C | -0.421983 | 1.494295  | -0.685486 |
| C | 0.920236  | 1.836482  | -0.299100 |
| C | 1.880543  | 0.792158  | 0.030012  |
| C | 1.537778  | -0.503904 | -0.342783 |
| C | 0.551983  | 4.158711  | -1.007165 |
| C | -0.736928 | 3.820588  | -1.432463 |
| B | -3.955945 | -1.781273 | 0.983867  |
| C | -1.183759 | 2.515832  | -1.282804 |
| C | 1.363921  | 3.170898  | -0.473333 |
| C | -5.777745 | 0.031744  | 0.711398  |
| C | -6.303141 | 1.148363  | 0.079666  |
| C | -5.478316 | 1.802096  | -0.836327 |
| C | -3.616299 | 0.340262  | -0.250968 |
| C | -4.157467 | 1.393948  | -1.011552 |
| C | -2.492157 | -1.598755 | 0.380002  |
| N | -4.512547 | -0.354703 | 0.520507  |
| H | 4.768647  | 3.134300  | 2.841783  |
| H | 2.613379  | 2.831583  | 1.707391  |
| H | 6.215056  | -0.523047 | 1.112552  |
| H | 6.606551  | 1.460794  | 2.511706  |
| H | 1.359692  | -2.768410 | -1.856875 |
| H | 3.189545  | -4.269212 | -2.526268 |
| H | 5.533358  | -3.800732 | -1.770315 |
| H | 6.006484  | -1.811077 | -0.406318 |
| H | 0.630102  | -2.898065 | 0.227235  |
| H | -1.649634 | -3.517099 | 0.912744  |
| H | 0.938671  | 5.171549  | -1.139987 |
| H | -1.380467 | 4.561125  | -1.912532 |
| H | -2.139329 | 2.267122  | -1.702718 |
| H | 2.398843  | 3.416742  | -0.248474 |
| H | -6.375376 | -0.605524 | 1.365326  |
| H | -7.335373 | 1.451450  | 0.254306  |
| H | -5.863777 | 2.627209  | -1.438852 |
| H | -3.600217 | 1.874512  | -1.800757 |
| C | -3.951011 | -1.893282 | 2.608543  |
| H | -4.974862 | -1.886744 | 3.025376  |



---

|   |           |           |           |
|---|-----------|-----------|-----------|
| H | -3.485608 | -2.843350 | 2.923977  |
| H | -3.387481 | -1.076865 | 3.093250  |
| C | -4.854045 | -2.933979 | 0.260534  |
| H | -4.406062 | -3.925830 | 0.447140  |
| H | -5.886092 | -2.970529 | 0.653904  |
| H | -4.917682 | -2.805340 | -0.834346 |

**En-TS4**

$E = -1350.846435$  Hartree

| Symbol | X         | Y         | Z         |
|--------|-----------|-----------|-----------|
| C      | 2.237015  | -0.348223 | 0.084187  |
| C      | 3.423104  | 0.479440  | -0.197842 |
| N      | 4.533864  | -0.305790 | -0.304148 |
| B      | 4.182413  | -1.885803 | -0.223008 |
| C      | 2.594966  | -1.699556 | -0.091395 |
| C      | 3.543403  | 1.849297  | -0.498147 |
| C      | 4.790624  | 2.380250  | -0.803554 |
| C      | 5.923661  | 1.554935  | -0.815014 |
| C      | 5.741849  | 0.201058  | -0.576551 |
| C      | -1.534792 | -0.524036 | 0.216121  |
| C      | -1.902257 | 0.832325  | 0.100618  |
| C      | -3.306989 | 1.129441  | -0.253476 |
| C      | -4.184696 | 0.049960  | -0.603362 |
| C      | -3.858298 | -1.301129 | -0.171692 |
| C      | -2.566257 | -1.546695 | 0.353106  |
| C      | -0.135577 | -0.931520 | 0.153124  |
| C      | 0.883038  | 0.039257  | 0.332474  |
| C      | 0.463385  | 1.367331  | 0.729584  |
| C      | -0.850724 | 1.827298  | 0.384012  |
| C      | 0.245425  | -2.260805 | -0.181203 |
| C      | 1.571576  | -2.650670 | -0.222287 |
| C      | -4.824248 | -2.333523 | -0.121160 |
| C      | -4.554343 | -3.543311 | 0.496246  |
| C      | -3.313042 | -3.743074 | 1.123603  |
| C      | -2.340749 | -2.759785 | 1.050858  |
| C      | -5.129847 | 2.667588  | -0.884702 |
| C      | -3.884542 | 2.424933  | -0.325367 |
| C      | -5.423295 | 0.319672  | -1.226064 |
| C      | -5.889532 | 1.610251  | -1.400342 |
| C      | -1.018518 | 3.239074  | 0.449104  |
| C      | -0.099379 | 4.077587  | 1.061705  |
| C      | 1.057203  | 3.548914  | 1.653539  |
| C      | 1.337807  | 2.210009  | 1.451370  |
| H      | 6.917023  | 1.945374  | -1.037813 |
| H      | 6.559970  | -0.519872 | -0.625246 |
| H      | -0.524104 | -2.987459 | -0.432248 |
| H      | 1.822015  | -3.692595 | -0.439641 |
| H      | -5.821696 | -2.163023 | -0.524788 |

---

|   |           |           |           |
|---|-----------|-----------|-----------|
| H | -5.323378 | -4.318137 | 0.536681  |
| H | -3.117842 | -4.662219 | 1.680591  |
| H | -1.394455 | -2.907343 | 1.569158  |
| H | -5.509895 | 3.691297  | -0.917985 |
| H | -3.378461 | 3.277561  | 0.099583  |
| H | -1.877435 | 3.715518  | 0.001807  |
| H | -0.302369 | 5.150318  | 1.102640  |
| H | 1.739035  | 4.182561  | 2.224826  |
| H | 2.258271  | 1.780383  | 1.846791  |
| C | 4.672388  | -2.591466 | -1.603446 |
| H | 5.773182  | -2.623243 | -1.695534 |
| H | 4.327616  | -3.639880 | -1.625001 |
| H | 4.273149  | -2.099874 | -2.507542 |
| C | 4.861900  | -2.521474 | 1.112778  |
| H | 4.561390  | -3.577140 | 1.225311  |
| H | 5.965724  | -2.509230 | 1.055748  |
| H | 4.567244  | -1.997777 | 2.038482  |
| H | -6.849587 | 1.792801  | -1.887968 |
| H | -6.038944 | -0.514169 | -1.562282 |
| H | 2.661374  | 2.482635  | -0.502207 |
| H | 4.881502  | 3.442919  | -1.040239 |

#### En-TS5

$E = -1350.839256$  Hartree

| Symbol | X         | Y         | Z         |
|--------|-----------|-----------|-----------|
| C      | -5.335823 | 2.558461  | 0.308619  |
| C      | -3.983672 | 2.330229  | 0.109902  |
| C      | -3.418665 | 1.030137  | 0.183992  |
| C      | -4.327660 | -0.068450 | 0.284211  |
| C      | -5.694207 | 0.191888  | 0.542631  |
| C      | -6.194400 | 1.482184  | 0.584499  |
| C      | -2.490263 | -1.603068 | -0.374852 |
| C      | -3.860747 | -1.411144 | -0.041840 |
| C      | -2.116727 | -2.821086 | -0.999749 |
| C      | -3.018727 | -3.857560 | -1.169123 |
| C      | -4.341674 | -3.710887 | -0.716101 |
| C      | -4.753234 | -2.501324 | -0.181894 |
| C      | 2.283300  | -0.221590 | -0.144281 |
| C      | 0.885229  | 0.183603  | -0.262554 |
| C      | -0.101285 | -0.827932 | -0.003689 |
| C      | 0.271470  | -2.099468 | 0.490238  |
| C      | 1.591292  | -2.427400 | 0.689539  |
| C      | 0.342785  | 1.551155  | -0.338929 |
| C      | -0.963021 | 1.807950  | 0.202822  |
| C      | -1.978406 | 0.762318  | 0.124128  |
| C      | -1.532119 | -0.537294 | -0.105105 |
| C      | -0.387330 | 4.181890  | 0.424202  |
| C      | 0.690637  | 3.982950  | -0.451161 |

---

|   |           |           |           |
|---|-----------|-----------|-----------|
| B | 4.138767  | -1.745257 | 0.639728  |
| C | 1.039734  | 2.687880  | -0.801413 |
| C | -1.215866 | 3.107445  | 0.709346  |
| C | 5.908757  | 0.047880  | 0.143474  |
| C | 6.330870  | 1.251201  | -0.397715 |
| C | 5.352684  | 2.054503  | -0.982300 |
| C | 3.605678  | 0.469517  | -0.344350 |
| C | 4.015030  | 1.665243  | -0.964227 |
| C | 2.591470  | -1.509127 | 0.364192  |
| N | 4.621399  | -0.311966 | 0.148413  |
| H | -5.728008 | 3.575878  | 0.242946  |
| H | -3.352036 | 3.177029  | -0.139113 |
| H | -6.383997 | -0.639848 | 0.680531  |
| H | -7.255148 | 1.653181  | 0.780914  |
| H | -1.100237 | -2.938753 | -1.372217 |
| H | -2.702218 | -4.780880 | -1.659355 |
| H | -5.055620 | -4.530690 | -0.822760 |
| H | -5.799834 | -2.385098 | 0.096586  |
| H | -0.506907 | -2.800109 | 0.785783  |
| H | 1.859797  | -3.390434 | 1.131810  |
| H | -0.610290 | 5.171392  | 0.828924  |
| H | 1.271412  | 4.826216  | -0.831176 |
| H | 1.840292  | 2.541221  | -1.506188 |
| H | -2.090270 | 3.267009  | 1.335439  |
| H | 6.602951  | -0.673072 | 0.578027  |
| H | 7.385090  | 1.527426  | -0.386706 |
| H | 5.623660  | 2.993033  | -1.470280 |
| H | 3.322128  | 2.312541  | -1.470068 |
| C | 4.816409  | -2.883369 | -0.312747 |
| H | 4.394265  | -3.874458 | -0.071071 |
| H | 5.909045  | -2.955882 | -0.163217 |
| H | 4.637238  | -2.705242 | -1.387719 |
| C | 4.485774  | -1.941132 | 2.220073  |
| H | 5.574790  | -1.991610 | 2.402409  |
| H | 4.058312  | -2.890063 | 2.588242  |
| H | 4.078187  | -1.132346 | 2.851702  |

**TS6**

$E = -1350.847794$  Hartree

| Symbol | X         | Y         | Z         |
|--------|-----------|-----------|-----------|
| N      | 4.547938  | 0.190031  | -0.247711 |
| B      | 4.357216  | 1.636623  | 0.454280  |
| C      | 3.368054  | -0.479635 | -0.385359 |
| C      | 3.338498  | -1.630770 | -1.191557 |
| C      | 4.517565  | -2.107090 | -1.753141 |
| C      | 5.727280  | -1.439297 | -1.517248 |
| C      | 5.692505  | -0.273002 | -0.767877 |
| C      | -2.426172 | 3.113514  | 0.264070  |

---

|   |           |           |           |
|---|-----------|-----------|-----------|
| C | -3.301966 | 4.038939  | -0.286398 |
| C | -4.372672 | 3.611117  | -1.081038 |
| C | -4.613708 | 2.251703  | -1.179871 |
| C | 1.817443  | 2.530552  | 0.927292  |
| C | 0.462586  | 2.276577  | 0.799297  |
| C | 2.273581  | 0.278696  | 0.251034  |
| C | 2.759575  | 1.550617  | 0.589884  |
| C | -1.905470 | -0.665327 | 0.259321  |
| C | -1.509728 | 0.685216  | 0.338401  |
| C | -0.071042 | 0.986489  | 0.511279  |
| C | 0.891045  | -0.070146 | 0.400951  |
| C | 0.446741  | -1.444443 | 0.468062  |
| C | -0.924602 | -1.742640 | 0.249222  |
| C | -3.331192 | -1.000889 | 0.205179  |
| C | -4.226903 | -0.073220 | -0.380331 |
| C | -3.772572 | 1.299141  | -0.563452 |
| C | -2.546484 | 1.713670  | 0.055728  |
| C | -3.871920 | -2.187769 | 0.758627  |
| C | -5.207694 | -2.522179 | 0.595117  |
| C | -6.056196 | -1.669804 | -0.130095 |
| C | -5.574454 | -0.452304 | -0.584447 |
| C | 1.332128  | -2.502827 | 0.793764  |
| C | 0.949184  | -3.825932 | 0.679852  |
| C | -0.335404 | -4.124115 | 0.187379  |
| C | -1.249992 | -3.104486 | -0.009384 |
| H | 6.669840  | -1.796230 | -1.932602 |
| H | 6.581594  | 0.333726  | -0.588012 |
| H | -1.664012 | 3.519388  | 0.911071  |
| H | -3.144490 | 5.102178  | -0.091972 |
| H | -5.036659 | 4.329769  | -1.566046 |
| H | -5.494513 | 1.909860  | -1.722613 |
| H | 2.142370  | 3.533229  | 1.219143  |
| H | -0.186070 | 3.118408  | 0.966959  |
| H | -3.237319 | -2.838283 | 1.356682  |
| H | -5.597323 | -3.438920 | 1.043279  |
| H | -7.104888 | -1.933634 | -0.284270 |
| H | -6.270544 | 0.243687  | -1.051251 |
| H | 2.335172  | -2.263180 | 1.142837  |
| H | 1.647031  | -4.625529 | 0.937592  |
| H | -0.624589 | -5.157783 | -0.015025 |
| H | -2.238315 | -3.360153 | -0.380773 |
| C | 5.120335  | 1.646687  | 1.893280  |
| H | 6.216165  | 1.564596  | 1.773817  |
| H | 4.925654  | 2.595588  | 2.423014  |
| H | 4.794062  | 0.828185  | 2.558512  |
| C | 4.888007  | 2.783996  | -0.569864 |
| H | 4.648605  | 3.783128  | -0.164783 |

---

|   |          |           |           |
|---|----------|-----------|-----------|
| H | 5.983936 | 2.752117  | -0.708379 |
| H | 4.422707 | 2.718323  | -1.569121 |
| H | 4.495479 | -2.999893 | -2.381617 |
| H | 2.396329 | -2.138142 | -1.379919 |

**Inversion of EH2**

*PMM (C1)*

*E* = -1504.420960 Hartree

| Symbol | X         | Y         | Z         |
|--------|-----------|-----------|-----------|
| C      | 0.773410  | 3.207104  | -0.447130 |
| C      | -0.493945 | 2.649515  | -0.365097 |
| C      | -0.697141 | 1.320669  | 0.093972  |
| C      | 0.452903  | 0.512403  | 0.350787  |
| C      | -2.121314 | -0.680165 | 0.251821  |
| C      | -1.029977 | -1.389675 | 0.909799  |
| C      | 0.236334  | -0.751024 | 1.036262  |
| C      | -1.236578 | -2.608429 | 1.604642  |
| C      | -0.243760 | -3.167511 | 2.395038  |
| C      | 0.991003  | -2.513192 | 2.544006  |
| C      | 1.215893  | -1.318333 | 1.880759  |
| C      | 1.733713  | 1.040210  | 0.013762  |
| C      | 3.037548  | 0.369657  | -0.137370 |
| N      | 4.028080  | 1.283595  | -0.122915 |
| B      | 3.471738  | 2.797465  | -0.255260 |
| C      | 1.913205  | 2.415771  | -0.244808 |
| C      | 3.360986  | -0.999242 | -0.427814 |
| C      | 4.743959  | -1.378475 | -0.412214 |
| C      | 5.731203  | -0.371167 | -0.221527 |
| C      | 5.339692  | 0.938391  | -0.141653 |
| C      | 2.395616  | -1.969168 | -0.807840 |
| C      | 2.770988  | -3.269215 | -1.075553 |
| C      | 4.126204  | -3.662945 | -0.966519 |
| C      | 5.095524  | -2.733330 | -0.652222 |
| C      | 4.023037  | 3.406118  | -1.661898 |
| C      | 3.907074  | 3.674289  | 1.045989  |
| C      | -2.026806 | 0.715778  | 0.171305  |
| C      | -4.376833 | -3.304274 | -1.272828 |
| C      | -3.283356 | -2.704801 | -0.668241 |
| C      | -3.305976 | -1.341275 | -0.278772 |
| C      | -4.474117 | -0.576181 | -0.564049 |
| C      | -5.576175 | -1.212056 | -1.178576 |
| C      | -5.539928 | -2.555350 | -1.519226 |
| C      | -3.272614 | 1.480816  | 0.155191  |
| C      | -4.494697 | 0.835652  | -0.200255 |
| C      | -3.339635 | 2.815825  | 0.630040  |
| C      | -4.536068 | 3.514028  | 0.677026  |
| C      | -5.724986 | 2.897355  | 0.254441  |
| C      | -5.698488 | 1.575030  | -0.159480 |
| H      | 0.879998  | 4.259162  | -0.726750 |

---

|   |           |           |           |
|---|-----------|-----------|-----------|
| H | -1.350112 | 3.248078  | -0.667062 |
| H | -2.215173 | -3.084342 | 1.573904  |
| H | -0.442255 | -4.095655 | 2.935789  |
| H | 1.760481  | -2.928948 | 3.198010  |
| H | 2.156384  | -0.789574 | 2.032549  |
| H | 6.789651  | -0.633583 | -0.205083 |
| H | 6.048679  | 1.765484  | -0.092281 |
| H | 4.405784  | -4.700821 | -1.160797 |
| H | 6.149269  | -3.017546 | -0.611751 |
| H | 3.560438  | 4.392348  | -1.843780 |
| H | 5.116698  | 3.562870  | -1.653102 |
| H | 3.783425  | 2.767841  | -2.530308 |
| H | 3.461762  | 4.683117  | 0.993511  |
| H | 3.579251  | 3.221592  | 1.998079  |
| H | 5.002664  | 3.810395  | 1.099792  |
| H | -4.322322 | -4.352279 | -1.576056 |
| H | -2.371128 | -3.283943 | -0.535902 |
| H | -2.442331 | 3.291150  | 1.020058  |
| H | -4.552098 | 4.535194  | 1.064502  |
| H | -6.671412 | 3.441679  | 0.286004  |
| H | -6.636909 | 1.089004  | -0.425950 |
| H | -6.403327 | -3.020084 | -2.000478 |
| H | -6.469313 | -0.633662 | -1.414746 |
| H | 2.016854  | -3.998856 | -1.377175 |
| H | 1.354398  | -1.677931 | -0.914875 |

**PMP (C2)**

*E* -1504.404660 Hartree

| Symbol | X         | Y         | Z         |
|--------|-----------|-----------|-----------|
| C      | -0.810424 | 3.176272  | 0.266932  |
| C      | 0.444443  | 2.594549  | 0.347920  |
| C      | 0.679268  | 1.252912  | -0.064311 |
| C      | -0.453342 | 0.443619  | -0.370649 |
| C      | 2.184191  | -0.720904 | -0.246784 |
| C      | 1.010193  | -1.545827 | -0.542435 |
| C      | -0.225651 | -0.901917 | -0.854730 |
| C      | 0.992023  | -2.967232 | -0.580795 |
| C      | -0.045888 | -3.670940 | -1.173147 |
| C      | -1.118398 | -2.980476 | -1.763539 |
| C      | -1.218162 | -1.615343 | -1.565441 |
| C      | -1.753945 | 1.001720  | -0.164105 |
| C      | -3.071622 | 0.358909  | -0.006258 |
| N      | -4.051051 | 1.264887  | -0.197835 |
| B      | -3.487278 | 2.783299  | -0.176856 |
| C      | -1.937457 | 2.391798  | -0.020941 |
| C      | -3.425422 | -0.947211 | 0.477214  |
| C      | -4.808646 | -1.322350 | 0.441690  |
| C      | -5.773190 | -0.357037 | 0.034213  |
| C      | -5.365098 | 0.926312  | -0.211155 |

---

|   |           |           |           |
|---|-----------|-----------|-----------|
| C | -2.494307 | -1.838389 | 1.073332  |
| C | -2.899719 | -3.071626 | 1.539252  |
| C | -4.249115 | -3.478584 | 1.413896  |
| C | -5.187585 | -2.617633 | 0.883114  |
| C | -4.143186 | 3.531330  | 1.112365  |
| C | -3.799930 | 3.530704  | -1.588853 |
| C | 2.019729  | 0.671245  | -0.133452 |
| C | 5.137059  | -3.141335 | -0.246284 |
| C | 3.910886  | -2.576741 | -0.563755 |
| C | 3.535902  | -1.283804 | -0.115559 |
| C | 4.564215  | -0.490117 | 0.479421  |
| C | 5.779931  | -1.105342 | 0.856862  |
| C | 6.057250  | -2.423466 | 0.533478  |
| C | 3.207262  | 1.520792  | -0.024043 |
| C | 4.413812  | 0.960929  | 0.481302  |
| C | 3.229649  | 2.878179  | -0.432114 |
| C | 4.324033  | 3.693885  | -0.191209 |
| C | 5.447388  | 3.174224  | 0.473454  |
| C | 5.495705  | 1.823303  | 0.777325  |
| H | -0.926836 | 4.239071  | 0.497820  |
| H | 1.269600  | 3.190389  | 0.727643  |
| H | 1.801818  | -3.530895 | -0.129697 |
| H | -0.011915 | -4.762478 | -1.195901 |
| H | -1.894915 | -3.518140 | -2.311339 |
| H | -2.089479 | -1.075953 | -1.935854 |
| H | -6.831069 | -0.618920 | -0.007484 |
| H | -6.061982 | 1.739233  | -0.418248 |
| H | -4.551285 | -4.467736 | 1.765295  |
| H | -6.239606 | -2.905414 | 0.825689  |
| H | -3.677104 | 4.524791  | 1.237790  |
| H | -5.228634 | 3.700393  | 0.994794  |
| H | -3.991003 | 2.977751  | 2.055429  |
| H | -4.886102 | 3.659150  | -1.748748 |
| H | -3.354231 | 4.540684  | -1.595730 |
| H | -3.395460 | 2.988700  | -2.461451 |
| H | 5.382538  | -4.140953 | -0.611925 |
| H | 3.242935  | -3.137247 | -1.209033 |
| H | 2.380377  | 3.285651  | -0.976554 |
| H | 4.311796  | 4.733478  | -0.525984 |
| H | 6.302490  | 3.815437  | 0.698724  |
| H | 6.412055  | 1.416629  | 1.203674  |
| H | 6.539883  | -0.521871 | 1.375800  |
| H | 7.007121  | -2.873801 | 0.829912  |
| H | -2.172086 | -3.739269 | 2.004648  |
| H | -1.456274 | -1.535844 | 1.186599  |

PPM (C3)

$E = -1504.417576$  Hartree

| Symbol | X | Y | Z |
|--------|---|---|---|
|--------|---|---|---|

---

|   |           |           |           |
|---|-----------|-----------|-----------|
| C | 0.979238  | 3.090711  | 0.829529  |
| C | -0.319792 | 2.625627  | 0.689307  |
| C | -0.599150 | 1.258897  | 0.419538  |
| C | 0.492326  | 0.342552  | 0.449084  |
| C | -2.202625 | -0.621604 | 0.398151  |
| C | -1.154926 | -1.437352 | 1.010697  |
| C | 0.200126  | -1.000453 | 0.933712  |
| C | -1.435910 | -2.601991 | 1.768233  |
| C | -0.430451 | -3.356072 | 2.352113  |
| C | 0.909011  | -2.953433 | 2.223477  |
| C | 1.207907  | -1.783637 | 1.546823  |
| C | 1.804528  | 0.885258  | 0.281284  |
| C | 3.055700  | 0.236930  | -0.134402 |
| N | 4.102642  | 1.050595  | 0.108897  |
| B | 3.643658  | 2.530228  | 0.568158  |
| C | 2.064499  | 2.244990  | 0.550809  |
| C | 3.275045  | -0.994953 | -0.839148 |
| C | 4.629934  | -1.410984 | -1.057368 |
| C | 5.687557  | -0.549662 | -0.651281 |
| C | 5.385522  | 0.677065  | -0.123131 |
| C | 2.225425  | -1.784358 | -1.378989 |
| C | 2.500271  | -2.963891 | -2.039733 |
| C | 3.835269  | -3.410684 | -2.187711 |
| C | 4.880240  | -2.644214 | -1.715406 |
| C | 4.160282  | 3.589680  | -0.556258 |
| C | 4.205488  | 2.847530  | 2.063693  |
| C | -1.945061 | 0.735428  | 0.171671  |
| C | -5.000658 | -3.088422 | -0.294971 |
| C | -3.732973 | -2.569807 | -0.089648 |
| C | -3.512098 | -1.177616 | 0.071333  |
| C | -4.615554 | -0.299693 | -0.135002 |
| C | -5.907876 | -0.854930 | -0.293940 |
| C | -6.107539 | -2.224145 | -0.350834 |
| C | -3.012147 | 1.591434  | -0.348147 |
| C | -4.360363 | 1.122813  | -0.331819 |
| C | -2.770166 | 2.870712  | -0.913220 |
| C | -3.803322 | 3.716632  | -1.281369 |
| C | -5.136094 | 3.308570  | -1.105516 |
| C | -5.400604 | 2.023475  | -0.662758 |
| H | 1.151929  | 4.128945  | 1.126075  |
| H | -1.148707 | 3.310291  | 0.858732  |
| H | -2.470495 | -2.891616 | 1.937836  |
| H | -0.686827 | -4.240658 | 2.939384  |
| H | 1.707777  | -3.527074 | 2.698687  |
| H | 2.236704  | -1.429837 | 1.541280  |
| H | 6.726483  | -0.843550 | -0.805292 |
| H | 6.148086  | 1.411782  | 0.137294  |
| H | 4.036491  | -4.354235 | -2.699835 |
| H | 5.915097  | -2.962313 | -1.859087 |



---

|   |           |           |           |
|---|-----------|-----------|-----------|
| H | 3.761184  | 4.593949  | -0.329308 |
| H | 5.261410  | 3.679367  | -0.574324 |
| H | 3.829323  | 3.329461  | -1.576933 |
| H | 3.821567  | 3.820888  | 2.415884  |
| H | 3.902533  | 2.088496  | 2.805890  |
| H | 5.308642  | 2.912823  | 2.081904  |
| H | -5.134160 | -4.165302 | -0.420188 |
| H | -2.883674 | -3.249565 | -0.078101 |
| H | -1.747494 | 3.192951  | -1.090951 |
| H | -3.576862 | 4.693718  | -1.713937 |
| H | -5.959417 | 3.979295  | -1.361108 |
| H | -6.437741 | 1.695470  | -0.605014 |
| H | -6.768574 | -0.198178 | -0.413930 |
| H | -7.115232 | -2.623998 | -0.484079 |
| H | 1.681889  | -3.553970 | -2.457093 |
| H | 1.196926  | -1.444844 | -1.289667 |

**PPP (C4)**

$E = -1504.415707$  Hartree

| Symbol | X         | Y         | Z         |
|--------|-----------|-----------|-----------|
| C      | -0.817567 | 2.973059  | -1.020370 |
| C      | 0.426708  | 2.503989  | -0.634729 |
| C      | 0.633277  | 1.137049  | -0.296658 |
| C      | -0.458745 | 0.232297  | -0.410140 |
| C      | 2.279663  | -0.698089 | -0.290972 |
| C      | 1.186522  | -1.646950 | -0.469333 |
| C      | -0.159767 | -1.179874 | -0.590240 |
| C      | 1.391650  | -3.052683 | -0.445940 |
| C      | 0.370310  | -3.947581 | -0.716276 |
| C      | -0.905213 | -3.464749 | -1.056701 |
| C      | -1.158459 | -2.107565 | -0.977464 |
| C      | -1.768817 | 0.817187  | -0.463600 |
| C      | -3.086932 | 0.267540  | -0.111553 |
| N      | -4.065984 | 1.049635  | -0.609460 |
| B      | -3.498828 | 2.454305  | -1.172450 |
| C      | -1.948294 | 2.150276  | -0.885135 |
| C      | -3.439243 | -0.804254 | 0.777727  |
| C      | -4.823956 | -1.158462 | 0.887079  |
| C      | -5.790065 | -0.377740 | 0.191863  |
| C      | -5.380286 | 0.736382  | -0.490717 |
| C      | -2.497072 | -1.473718 | 1.602502  |
| C      | -2.896294 | -2.494391 | 2.440410  |
| C      | -4.252141 | -2.898585 | 2.484835  |
| C      | -5.199252 | -2.237550 | 1.730513  |
| C      | -3.820842 | 2.599793  | -2.762041 |
| C      | -4.142404 | 3.647337  | -0.269065 |
| C      | 1.968459  | 0.634036  | 0.003674  |
| C      | 5.428090  | -2.413166 | -1.550704 |
| C      | 4.092628  | -2.135491 | -1.304450 |

---

|   |           |           |           |
|---|-----------|-----------|-----------|
| C | 3.690132  | -1.044864 | -0.490164 |
| C | 4.709495  | -0.175445 | -0.000434 |
| C | 6.064672  | -0.488031 | -0.252770 |
| C | 6.428394  | -1.597655 | -0.998291 |
| C | 2.971526  | 1.465770  | 0.666458  |
| C | 4.328033  | 1.033742  | 0.718303  |
| C | 2.608049  | 2.615252  | 1.415065  |
| C | 3.543299  | 3.340629  | 2.135474  |
| C | 4.887771  | 2.933934  | 2.147728  |
| C | 5.263003  | 1.790826  | 1.459979  |
| H | -0.921764 | 3.997657  | -1.387756 |
| H | 1.287800  | 3.170144  | -0.677157 |
| H | 2.372147  | -3.443102 | -0.184611 |
| H | 0.566158  | -5.021665 | -0.684029 |
| H | -1.699312 | -4.152553 | -1.354868 |
| H | -2.152321 | -1.744232 | -1.226826 |
| H | -6.849433 | -0.629180 | 0.254331  |
| H | -6.077377 | 1.427920  | -0.965198 |
| H | -4.550471 | -3.720511 | 3.139438  |
| H | -6.253772 | -2.515418 | 1.790214  |
| H | -3.362109 | 3.520341  | -3.163188 |
| H | -4.907055 | 2.674055  | -2.952526 |
| H | -3.433356 | 1.754791  | -3.357447 |
| H | -3.676303 | 4.610150  | -0.543468 |
| H | -3.980895 | 3.503007  | 0.813592  |
| H | -5.229192 | 3.759999  | -0.433090 |
| H | 5.694990  | -3.253449 | -2.195676 |
| H | 3.339492  | -2.744227 | -1.797992 |
| H | 1.562727  | 2.913022  | 1.467712  |
| H | 3.225878  | 4.212677  | 2.711600  |
| H | 5.629728  | 3.496269  | 2.719008  |
| H | 6.299694  | 1.459742  | 1.517742  |
| H | 7.483219  | -1.810109 | -1.185920 |
| H | 6.846308  | 0.176062  | 0.115384  |
| H | -2.161186 | -2.991735 | 3.076267  |
| H | -1.455542 | -1.162150 | 1.589748  |

**En-TS1**

$E = -1504.410282$  Hartree

| Symbol | X         | Y        | Z         |
|--------|-----------|----------|-----------|
| C      | 3.384376  | 3.003952 | -0.134324 |
| C      | 4.596331  | 3.646505 | -0.331721 |
| C      | 5.772031  | 2.903334 | -0.491895 |
| C      | 5.683393  | 1.523980 | -0.489030 |
| C      | -1.008763 | 3.312784 | 0.230304  |
| C      | 0.299673  | 2.850123 | 0.288430  |
| C      | -1.783207 | 1.048276 | 0.123063  |
| C      | -3.001334 | 0.291557 | -0.207562 |
| N      | -4.071951 | 1.109668 | -0.178411 |

---

|   |           |           |           |
|---|-----------|-----------|-----------|
| B | -3.660706 | 2.668285  | -0.030934 |
| C | -2.079433 | 2.424202  | 0.085911  |
| C | -3.167619 | -1.062685 | -0.655354 |
| C | -4.504812 | -1.553688 | -0.820750 |
| C | -5.594618 | -0.657286 | -0.635169 |
| C | -5.337719 | 0.661140  | -0.369839 |
| C | -2.084295 | -1.912637 | -1.003283 |
| C | -2.310852 | -3.208487 | -1.418259 |
| C | -3.629335 | -3.717297 | -1.499378 |
| C | -4.705807 | -2.902342 | -1.217765 |
| C | 2.096407  | -0.517134 | 0.452200  |
| C | 1.996451  | 0.874649  | 0.259943  |
| C | 0.636791  | 1.468575  | 0.351647  |
| C | -0.484143 | 0.577649  | 0.470516  |
| C | -0.265381 | -0.680667 | 1.159615  |
| C | 1.043567  | -1.214185 | 1.180964  |
| C | 3.223284  | -1.276562 | -0.065514 |
| C | 4.412466  | -0.602566 | -0.438023 |
| C | 4.454001  | 0.846327  | -0.316282 |
| C | 3.247525  | 1.590590  | -0.078412 |
| C | 3.129082  | -2.671388 | -0.317148 |
| C | 4.189978  | -3.384264 | -0.847655 |
| C | 5.391674  | -2.722441 | -1.156190 |
| C | 5.489421  | -1.354283 | -0.967307 |
| C | -1.278680 | -1.296754 | 1.930600  |
| C | -1.011964 | -2.420718 | 2.693972  |
| C | 0.292705  | -2.944171 | 2.732743  |
| C | 1.301873  | -2.343757 | 1.996012  |
| H | 2.534426  | 3.652090  | -0.009358 |
| H | 4.622600  | 4.738391  | -0.348071 |
| H | 6.737372  | 3.397175  | -0.621642 |
| H | 6.595092  | 0.942508  | -0.616780 |
| H | -1.186835 | 4.391320  | 0.263298  |
| H | 1.058566  | 3.614042  | 0.348050  |
| H | -6.620829 | -1.006210 | -0.756337 |
| H | -6.123811 | 1.413387  | -0.296699 |
| H | -3.792489 | -4.750925 | -1.812540 |
| H | -5.728016 | -3.273393 | -1.318695 |
| H | 2.190123  | -3.187629 | -0.126046 |
| H | 4.083173  | -4.453501 | -1.043880 |
| H | -2.273020 | -0.853025 | 1.961283  |
| H | -1.804648 | -2.872761 | 3.294166  |
| H | 0.521655  | -3.802430 | 3.368414  |
| H | 2.320097  | -2.721339 | 2.081316  |
| C | -4.301009 | 3.286696  | 1.332608  |
| H | -3.952016 | 4.323655  | 1.480430  |
| H | -5.404711 | 3.323887  | 1.287638  |

---

|   |           |           |           |
|---|-----------|-----------|-----------|
| H | -4.021858 | 2.716114  | 2.235568  |
| C | -4.140189 | 3.441698  | -1.381838 |
| H | -5.240545 | 3.494957  | -1.467186 |
| H | -3.769920 | 4.481892  | -1.363757 |
| H | -3.755469 | 2.973825  | -2.304915 |
| H | 6.234275  | -3.276237 | -1.576276 |
| H | 6.407085  | -0.852108 | -1.270360 |
| H | -1.067858 | -1.530896 | -0.966821 |
| H | -1.466473 | -3.844251 | -1.692210 |

## TS2

$E = -1504.405188$  Hartree

| Symbol | X         | Y         | Z         |
|--------|-----------|-----------|-----------|
| C      | 1.323418  | -3.073607 | -1.007963 |
| C      | 0.269707  | -3.888084 | -1.392570 |
| C      | -1.018391 | -3.358696 | -1.525577 |
| C      | -1.212053 | -2.030973 | -1.202638 |
| C      | -3.068743 | 0.248431  | -0.018796 |
| N      | -4.070329 | 1.054001  | -0.425772 |
| B      | -3.529949 | 2.448213  | -1.036317 |
| C      | -3.370667 | -0.857006 | 0.847585  |
| C      | -4.749272 | -1.194463 | 1.049764  |
| C      | -5.752001 | -0.371186 | 0.464300  |
| C      | -5.376789 | 0.757055  | -0.214642 |
| C      | -2.380070 | -1.584855 | 1.558171  |
| C      | -2.732169 | -2.641007 | 2.373099  |
| C      | -4.088541 | -3.021924 | 2.509951  |
| C      | -5.078622 | -2.306509 | 1.869135  |
| C      | 5.677416  | -2.613466 | -0.656654 |
| C      | 4.313047  | -2.385546 | -0.559128 |
| C      | 6.085918  | -0.329310 | -0.106323 |
| C      | 6.585837  | -1.567823 | -0.461355 |
| C      | 1.951329  | 0.570000  | -0.113786 |
| C      | 2.296582  | -0.777898 | -0.330982 |
| C      | 3.743361  | -1.116145 | -0.264211 |
| C      | 4.700615  | -0.086337 | 0.038554  |
| C      | 4.257809  | 1.191297  | 0.573835  |
| C      | 2.875811  | 1.492285  | 0.539253  |
| C      | 0.631984  | 1.085694  | -0.458578 |
| C      | -0.467163 | 0.199520  | -0.480950 |
| C      | -0.165787 | -1.197902 | -0.737148 |
| C      | 1.186169  | -1.693587 | -0.693689 |
| C      | 0.426870  | 2.439148  | -0.845522 |
| C      | -0.837970 | 2.916355  | -1.145109 |
| C      | -1.966290 | 2.119976  | -0.882553 |
| C      | -1.773770 | 0.790967  | -0.453715 |
| C      | 5.143857  | 2.099526  | 1.202547  |
| C      | 4.681297  | 3.248516  | 1.821293  |

---

|   |           |           |           |
|---|-----------|-----------|-----------|
| C | 3.300450  | 3.506710  | 1.864699  |
| C | 2.419655  | 2.640247  | 1.240788  |
| H | 2.277449  | -3.566546 | -0.966580 |
| H | 0.466819  | -4.938451 | -1.618399 |
| H | -1.848573 | -3.969563 | -1.885852 |
| H | -2.199167 | -1.598594 | -1.343452 |
| H | -6.807775 | -0.607724 | 0.601693  |
| H | -6.096253 | 1.471362  | -0.616290 |
| H | -4.350801 | -3.870664 | 3.145492  |
| H | -6.130618 | -2.569081 | 1.999839  |
| H | 6.029762  | -3.618258 | -0.900591 |
| H | 3.702268  | -3.253570 | -0.730704 |
| H | 1.293627  | 3.087741  | -0.971777 |
| H | -0.957854 | 3.928772  | -1.540230 |
| H | 6.209596  | 1.879978  | 1.244629  |
| H | 5.385486  | 3.926165  | 2.309232  |
| H | 2.917465  | 4.374470  | 2.406274  |
| H | 1.351344  | 2.829084  | 1.324922  |
| C | -4.071185 | 3.655683  | -0.086110 |
| H | -3.617641 | 4.610068  | -0.406832 |
| H | -5.166612 | 3.783843  | -0.152085 |
| H | -3.814714 | 3.513423  | 0.978325  |
| C | -3.987187 | 2.593578  | -2.592783 |
| H | -5.084329 | 2.686232  | -2.689021 |
| H | -3.548812 | 3.504683  | -3.036045 |
| H | -3.667237 | 1.740120  | -3.215620 |
| H | 7.661005  | -1.724383 | -0.570654 |
| H | 6.785972  | 0.486618  | 0.066045  |
| H | -1.958850 | -3.183821 | 2.920300  |
| H | -1.336278 | -1.292960 | 1.476219  |

### En-TS3

$E = -1504.378724$  Hartree

| Symbol | X         | Y         | Z         |
|--------|-----------|-----------|-----------|
| C      | -1.642638 | 1.109996  | -0.477452 |
| C      | -0.420562 | 0.414348  | -0.804009 |
| C      | 0.805625  | 1.152696  | -0.738618 |
| C      | 0.767985  | 2.561800  | -0.609401 |
| C      | -0.421786 | 3.225967  | -0.380433 |
| C      | -0.233997 | -1.020386 | -1.047676 |
| C      | 0.896694  | -1.666340 | -0.457100 |
| C      | 2.073551  | 0.451431  | -0.504175 |
| C      | 0.165896  | -3.790299 | -1.429505 |
| C      | -0.837074 | -3.122297 | -2.142419 |
| B      | -2.856911 | 2.988507  | 0.669837  |
| C      | -3.984784 | 3.832502  | -0.156506 |
| C      | -1.007922 | -1.755919 | -1.957769 |
| C      | 1.039808  | -3.063640 | -0.629973 |

---

|   |           |           |           |
|---|-----------|-----------|-----------|
| C | -2.433672 | 3.689696  | 2.073599  |
| C | -4.420322 | 1.236272  | 1.821817  |
| C | -4.953966 | -0.019685 | 1.924331  |
| C | -4.671106 | -0.954053 | 0.892743  |
| C | -2.956580 | 0.607043  | 0.047473  |
| C | -3.748315 | -0.582807 | -0.147536 |
| C | -5.384436 | -2.178000 | 0.788643  |
| C | -3.819517 | -1.310280 | -1.361095 |
| C | -5.319075 | -2.931947 | -0.364576 |
| C | -4.582823 | -2.454472 | -1.473044 |
| C | -1.599340 | 2.499279  | -0.188193 |
| N | -3.460809 | 1.519144  | 0.907369  |
| C | 3.903863  | -2.805296 | 2.625778  |
| C | 2.902231  | -2.407871 | 1.754592  |
| C | 3.090850  | -1.329178 | 0.854118  |
| C | 4.329525  | -0.623562 | 0.886576  |
| C | 5.335458  | -1.053114 | 1.781367  |
| C | 5.136975  | -2.130501 | 2.630966  |
| C | 3.385283  | 1.059743  | -0.683609 |
| C | 4.517072  | 0.511680  | -0.009410 |
| C | 3.601032  | 2.098861  | -1.624487 |
| C | 4.863679  | 2.623162  | -1.849473 |
| C | 5.967729  | 2.120222  | -1.140045 |
| C | 5.791734  | 1.074126  | -0.248035 |
| C | 2.011637  | -0.846502 | 0.008874  |
| H | 1.699355  | 3.121294  | -0.554533 |
| H | -0.408081 | 4.302463  | -0.189480 |
| H | 0.318248  | -4.863946 | -1.561456 |
| H | -1.460620 | -3.657622 | -2.861674 |
| H | -4.888316 | 4.015956  | 0.452471  |
| H | -3.579015 | 4.819709  | -0.439082 |
| H | -4.303197 | 3.328440  | -1.085610 |
| H | -1.693919 | -1.215387 | -2.596319 |
| H | 1.906161  | -3.569808 | -0.208163 |
| H | -3.306575 | 3.918600  | 2.711730  |
| H | -1.930848 | 4.652853  | 1.877702  |
| H | -1.735876 | 3.074928  | 2.668981  |
| H | -4.702728 | 2.059013  | 2.478575  |
| H | -5.662294 | -0.263700 | 2.716684  |
| H | -6.034872 | -2.475431 | 1.614135  |
| H | -3.341296 | -0.899397 | -2.240340 |
| H | -5.889608 | -3.859618 | -0.447619 |
| H | -4.633437 | -2.979711 | -2.428896 |
| H | 3.724643  | -3.629107 | 3.320373  |
| H | 1.933775  | -2.904389 | 1.797071  |
| H | 6.282313  | -0.514959 | 1.826882  |
| H | 5.928864  | -2.436035 | 3.318442  |

---

|   |          |          |           |
|---|----------|----------|-----------|
| H | 2.764554 | 2.461880 | -2.219800 |
| H | 4.999496 | 3.412150 | -2.592584 |
| H | 6.965955 | 2.528939 | -1.311923 |
| H | 6.665286 | 0.660304 | 0.255670  |

**TS3a** $E = -1504.365118$  Hartree

| Symbol | X         | Y         | Z         |
|--------|-----------|-----------|-----------|
| C      | -1.734297 | 0.650008  | -0.854737 |
| C      | -0.413003 | 0.030719  | -0.760646 |
| C      | 0.705669  | 0.920452  | -0.779850 |
| C      | 0.567545  | 2.189902  | -1.397985 |
| C      | -0.677478 | 2.691740  | -1.705908 |
| C      | -0.075012 | -1.375325 | -0.604038 |
| C      | 1.230215  | -1.796654 | -0.190419 |
| C      | 2.001312  | 0.516822  | -0.245248 |
| C      | 0.395584  | -4.101238 | -0.033817 |
| C      | -0.771947 | -3.723527 | -0.717335 |
| B      | -3.175005 | 2.710618  | -0.800398 |
| C      | -4.291906 | 2.896735  | -1.977786 |
| C      | -0.982715 | -2.381920 | -0.978912 |
| C      | 1.383346  | -3.155789 | 0.192956  |
| C      | -2.933727 | 4.060652  | 0.071293  |
| C      | -4.600631 | 1.620604  | 1.089740  |
| C      | -4.986959 | 0.545862  | 1.842248  |
| C      | -4.616759 | -0.747834 | 1.388866  |
| C      | -3.051103 | 0.325154  | -0.191192 |
| C      | -3.759083 | -0.868902 | 0.236612  |
| C      | -5.214443 | -1.909799 | 1.948253  |
| C      | -3.848928 | -2.092181 | -0.480502 |
| C      | -5.135940 | -3.122432 | 1.298076  |
| C      | -4.513891 | -3.188391 | 0.031017  |
| C      | -1.813710 | 2.007689  | -1.249435 |
| N      | -3.666003 | 1.491809  | 0.117834  |
| C      | 5.549089  | -2.805026 | -0.532493 |
| C      | 4.200296  | -2.486140 | -0.508777 |
| C      | 3.736051  | -1.216865 | -0.075179 |
| C      | 4.715377  | -0.234981 | 0.257611  |
| C      | 6.083813  | -0.587806 | 0.237249  |
| C      | 6.502447  | -1.855789 | -0.132138 |
| C      | 2.942802  | 1.504710  | 0.288818  |
| C      | 4.281579  | 1.117027  | 0.586381  |
| C      | 2.522990  | 2.799205  | 0.693303  |
| C      | 3.391980  | 3.694335  | 1.296158  |
| C      | 4.725218  | 3.324265  | 1.535984  |
| C      | 5.149934  | 2.049340  | 1.198288  |
| C      | 2.320633  | -0.839131 | -0.131819 |
| H      | 1.461857  | 2.774945  | -1.610937 |

---

|   |           |           |           |
|---|-----------|-----------|-----------|
| H | -0.774394 | 3.684504  | -2.152940 |
| H | 0.549934  | -5.136256 | 0.279142  |
| H | -1.510417 | -4.467121 | -1.024644 |
| H | -5.257664 | 3.246984  | -1.571313 |
| H | -3.949589 | 3.657268  | -2.701171 |
| H | -4.481261 | 1.966168  | -2.540345 |
| H | -1.837522 | -2.066095 | -1.552589 |
| H | 2.298481  | -3.464480 | 0.692677  |
| H | -2.486371 | 4.843486  | -0.565680 |
| H | -3.873689 | 4.484129  | 0.469386  |
| H | -2.248823 | 3.906322  | 0.923827  |
| H | -4.973537 | 2.631111  | 1.254638  |
| H | -5.657848 | 0.666730  | 2.693191  |
| H | -5.800014 | -1.803483 | 2.864131  |
| H | -3.483567 | -2.142540 | -1.499219 |
| H | -5.619932 | -4.006877 | 1.718000  |
| H | -4.579751 | -4.102298 | -0.562692 |
| H | 5.865105  | -3.788497 | -0.887814 |
| H | 3.491496  | -3.217700 | -0.886979 |
| H | 6.835412  | 0.161423  | 0.484592  |
| H | 7.567225  | -2.098741 | -0.147291 |
| H | 1.481050  | 3.087974  | 0.573941  |
| H | 3.027759  | 4.676636  | 1.605399  |
| H | 5.415632  | 4.022069  | 2.015030  |
| H | 6.171369  | 1.755644  | 1.438988  |

#### En-TS4

$E = -1504.395437$  Hartree

| Symbol | X         | Y         | Z         |
|--------|-----------|-----------|-----------|
| C      | -1.728338 | 1.016874  | 0.081857  |
| C      | -3.047883 | 0.383506  | -0.072657 |
| N      | -4.017777 | 1.316811  | 0.003719  |
| B      | -3.428124 | 2.823590  | -0.093350 |
| C      | -1.882136 | 2.400337  | -0.144138 |
| C      | -3.411054 | -0.959670 | -0.438630 |
| C      | -4.801094 | -1.308099 | -0.417328 |
| C      | -5.760666 | -0.291809 | -0.143602 |
| C      | -5.336033 | 1.001613  | -0.003006 |
| C      | -2.477750 | -1.922086 | -0.905026 |
| C      | -2.888290 | -3.191851 | -1.253507 |
| C      | -4.248158 | -3.562382 | -1.139611 |
| C      | -5.187851 | -2.635594 | -0.738521 |
| C      | 2.024926  | 0.617343  | 0.191369  |
| C      | 2.171653  | -0.783980 | 0.267887  |
| C      | 3.500965  | -1.347049 | -0.051712 |
| C      | 4.523347  | -0.481612 | -0.565243 |
| C      | 4.427823  | 0.950819  | -0.325627 |
| C      | 3.209834  | 1.469306  | 0.177541  |



---

|   |           |           |           |
|---|-----------|-----------|-----------|
| C | 0.706470  | 1.231057  | 0.078551  |
| C | -0.445132 | 0.454849  | 0.364158  |
| C | -0.237055 | -0.850605 | 0.950263  |
| C | 0.984812  | -1.553507 | 0.689159  |
| C | 0.519894  | 2.564719  | -0.383263 |
| C | -0.729820 | 3.159981  | -0.400020 |
| C | 5.545390  | 1.811545  | -0.432369 |
| C | 5.492462  | 3.120318  | 0.017166  |
| C | 4.322822  | 3.597927  | 0.631811  |
| C | 3.205379  | 2.783414  | 0.708554  |
| C | 5.039602  | -3.229092 | -0.472596 |
| C | 3.867626  | -2.714500 | 0.060576  |
| C | 5.681756  | -1.030439 | -1.157935 |
| C | 5.935074  | -2.390339 | -1.147706 |
| C | 0.925983  | -2.951658 | 0.948876  |
| C | -0.119669 | -3.543792 | 1.642251  |
| C | -1.184049 | -2.768332 | 2.122882  |
| C | -1.246524 | -1.441971 | 1.741736  |
| H | -6.824531 | -0.531608 | -0.118989 |
| H | -6.021013 | 1.843673  | 0.103585  |
| H | -4.557183 | -4.578119 | -1.397476 |
| H | -6.247029 | -2.899417 | -0.692969 |
| H | 1.379489  | 3.135691  | -0.726721 |
| H | -0.823028 | 4.213381  | -0.678294 |
| H | 6.488100  | 1.429990  | -0.823076 |
| H | 6.374784  | 3.759695  | -0.060885 |
| H | 4.296216  | 4.601203  | 1.062972  |
| H | 2.315619  | 3.147817  | 1.219579  |
| H | 5.255295  | -4.294086 | -0.359444 |
| H | 3.251251  | -3.405801 | 0.613714  |
| H | 1.701226  | -3.614978 | 0.597528  |
| H | -0.090053 | -4.619650 | 1.830086  |
| H | -1.969828 | -3.209754 | 2.739110  |
| H | -2.097528 | -0.829115 | 2.038243  |
| C | -4.008533 | 3.487781  | -1.461300 |
| H | -5.095449 | 3.678762  | -1.410253 |
| H | -3.524262 | 4.465880  | -1.627162 |
| H | -3.816879 | 2.872714  | -2.357389 |
| C | -3.798590 | 3.664803  | 1.249146  |
| H | -3.332177 | 4.664117  | 1.213138  |
| H | -4.887934 | 3.826886  | 1.342499  |
| H | -3.451282 | 3.175266  | 2.175193  |
| H | 6.837108  | -2.790728 | -1.615501 |
| H | 6.407476  | -0.361331 | -1.619525 |
| H | -1.431393 | -1.648419 | -1.010552 |
| H | -2.155086 | -3.914657 | -1.616614 |

---

**TS5** $E = -1504.366743$  Hartree

| Symbol | X         | Y         | Z         |
|--------|-----------|-----------|-----------|
| C      | 4.778420  | -3.107331 | 1.495019  |
| C      | 3.561447  | -2.629788 | 1.037139  |
| C      | 3.447669  | -1.366634 | 0.402285  |
| C      | 4.594800  | -0.523388 | 0.382055  |
| C      | 5.836692  | -1.052419 | 0.807450  |
| C      | 5.937972  | -2.329495 | 1.334170  |
| C      | 3.102096  | 1.403144  | -0.129644 |
| C      | 4.419458  | 0.894800  | 0.088051  |
| C      | 2.916707  | 2.802254  | 0.022388  |
| C      | 3.982432  | 3.673511  | 0.180308  |
| C      | 5.294982  | 3.174906  | 0.202905  |
| C      | 5.498124  | 1.805283  | 0.186392  |
| C      | -1.721063 | 0.808462  | -0.672628 |
| C      | -0.448628 | 0.115324  | -0.793306 |
| C      | 0.716252  | 0.939972  | -0.933287 |
| C      | 0.551235  | 2.230033  | -1.499623 |
| C      | -0.680539 | 2.852153  | -1.494520 |
| C      | -0.165560 | -1.317228 | -0.850861 |
| C      | 1.157518  | -1.812225 | -0.622271 |
| C      | 2.204441  | -0.893842 | -0.197061 |
| C      | 2.014911  | 0.468264  | -0.446047 |
| C      | 0.449687  | -4.035907 | -1.387512 |
| C      | -0.850193 | -3.555173 | -1.593168 |
| B      | -2.953803 | 2.910592  | -0.069046 |
| C      | -1.119683 | -2.218569 | -1.352199 |
| C      | 1.430207  | -3.167250 | -0.933202 |
| C      | -4.328822 | 1.532937  | 1.695806  |
| C      | -4.812678 | 0.345545  | 2.176269  |
| C      | -4.617648 | -0.820244 | 1.387070  |
| C      | -2.993723 | 0.454559  | 0.040899  |
| C      | -3.805722 | -0.730911 | 0.202281  |
| C      | -5.337467 | -2.017197 | 1.651063  |
| C      | -4.037349 | -1.705449 | -0.805546 |
| C      | -5.409153 | -3.016030 | 0.703384  |
| C      | -4.815498 | -2.819545 | -0.565293 |
| C      | -1.760582 | 2.210968  | -0.871353 |
| N      | -3.460652 | 1.564965  | 0.656318  |
| H      | 4.831224  | -4.082258 | 1.984793  |
| H      | 2.668007  | -3.231394 | 1.191760  |
| H      | 6.733297  | -0.435441 | 0.762332  |
| H      | 6.907785  | -2.708180 | 1.664602  |
| H      | 1.422296  | 2.755318  | -1.886601 |
| H      | -0.774137 | 3.884091  | -1.843859 |
| H      | 0.706503  | -5.070441 | -1.626151 |
| H      | -1.632552 | -4.203791 | -1.993947 |

---

|   |           |           |           |
|---|-----------|-----------|-----------|
| H | -2.073415 | -1.820524 | -1.643255 |
| H | 2.452423  | -3.530975 | -0.862851 |
| H | -4.581016 | 2.500513  | 2.130294  |
| H | -5.437636 | 0.314548  | 3.069233  |
| H | -5.891324 | -2.097011 | 2.589082  |
| H | -3.687837 | -1.517353 | -1.817128 |
| H | -5.986954 | -3.921543 | 0.900967  |
| H | -4.994950 | -3.536883 | -1.368577 |
| H | 6.146129  | 3.854144  | 0.288102  |
| H | 6.514284  | 1.427449  | 0.292662  |
| H | 1.910373  | 3.210292  | 0.046616  |
| H | 3.794796  | 4.743510  | 0.294389  |
| C | -2.406148 | 3.998400  | 1.007660  |
| H | -1.979132 | 4.869023  | 0.479910  |
| H | -3.210341 | 4.388279  | 1.658048  |
| H | -1.613450 | 3.594396  | 1.661691  |
| C | -4.203543 | 3.456270  | -0.964514 |
| H | -5.040733 | 3.805355  | -0.333813 |
| H | -3.876044 | 4.317671  | -1.572830 |
| H | -4.600309 | 2.694533  | -1.657829 |

**TS6**

$E = -1504.398158$  Hartree

| Symbol | X         | Y         | Z         |
|--------|-----------|-----------|-----------|
| N      | -4.130034 | 1.016146  | -0.256849 |
| B      | -3.714332 | 2.531433  | -0.646124 |
| C      | -3.058233 | 0.246697  | 0.019190  |
| C      | -3.248091 | -0.966193 | 0.766244  |
| C      | -4.589194 | -1.439277 | 0.945630  |
| C      | -5.669543 | -0.642685 | 0.470252  |
| C      | -5.403577 | 0.588409  | -0.065771 |
| C      | -2.188252 | -1.672074 | 1.394829  |
| C      | -2.435506 | -2.830342 | 2.101723  |
| C      | -3.750744 | -3.343149 | 2.202985  |
| C      | -4.808488 | -2.655914 | 1.644530  |
| C      | 3.197842  | 3.053267  | 0.288416  |
| C      | 4.159793  | 3.724556  | 1.030104  |
| C      | 5.126075  | 3.006732  | 1.745987  |
| C      | 5.182325  | 1.633887  | 1.578174  |
| C      | -1.050353 | 3.193914  | -0.644664 |
| C      | 0.250188  | 2.746105  | -0.472453 |
| C      | -1.822864 | 0.943468  | -0.379204 |
| C      | -2.127499 | 2.302959  | -0.562731 |
| C      | 2.189287  | -0.542207 | -0.483167 |
| C      | 1.978406  | 0.838109  | -0.288821 |
| C      | 0.601989  | 1.365274  | -0.425338 |
| C      | -0.489985 | 0.447143  | -0.550274 |
| C      | -0.229779 | -0.928936 | -0.905263 |

|   |           |           |           |
|---|-----------|-----------|-----------|
| C | 1.076647  | -1.453713 | -0.723764 |
| C | 3.553887  | -1.076011 | -0.460917 |
| C | 4.531276  | -0.416293 | 0.324164  |
| C | 4.254085  | 0.943896  | 0.767303  |
| C | 3.124952  | 1.636752  | 0.217256  |
| C | 3.963045  | -2.194660 | -1.228248 |
| C | 5.231709  | -2.739124 | -1.099115 |
| C | 6.144094  | -2.174133 | -0.193025 |
| C | 5.803309  | -1.014240 | 0.484598  |
| C | -1.242566 | -1.765570 | -1.436860 |
| C | -1.048311 | -3.125452 | -1.583523 |
| C | 0.163076  | -3.691850 | -1.146096 |
| C | 1.200897  | -2.871681 | -0.737376 |
| H | -6.698881 | -0.982355 | 0.590774  |
| H | -6.187499 | 1.286985  | -0.360306 |
| H | -3.929060 | -4.272537 | 2.748533  |
| H | -5.831795 | -3.021428 | 1.754770  |
| H | 2.526776  | 3.675917  | -0.283139 |
| H | 4.153143  | 4.816683  | 1.047475  |
| H | 5.854889  | 3.519187  | 2.377522  |
| H | 5.984486  | 1.075883  | 2.060311  |
| H | -1.227419 | 4.264593  | -0.780493 |
| H | 1.004644  | 3.512409  | -0.427846 |
| H | 3.282093  | -2.618741 | -1.963079 |
| H | 5.520895  | -3.595266 | -1.712709 |
| H | 7.138412  | -2.608207 | -0.066242 |
| H | 6.558391  | -0.528832 | 1.101907  |
| H | -2.194470 | -1.324879 | -1.728562 |
| H | -1.841425 | -3.754197 | -1.993565 |
| H | 0.299283  | -4.775605 | -1.148099 |
| H | 2.127201  | -3.334641 | -0.409310 |
| C | -4.212435 | 2.886711  | -2.155060 |
| H | -5.315260 | 2.903256  | -2.227316 |
| H | -3.857572 | 3.890030  | -2.448872 |
| H | -3.838204 | 2.173473  | -2.910080 |
| C | -4.329292 | 3.521539  | 0.491035  |
| H | -3.955874 | 4.547918  | 0.327361  |
| H | -5.432330 | 3.573020  | 0.453287  |
| H | -4.043118 | 3.229558  | 1.516639  |
| H | -1.609737 | -3.354412 | 2.586954  |
| H | -1.174689 | -1.283500 | 1.338140  |

**Inversion of EH3**

*PMM (C1)*

*E* = -1657.975594 Hartree

| Symbol | X         | Y        | Z         |
|--------|-----------|----------|-----------|
| C      | 0.482115  | 3.526388 | -0.600489 |
| C      | -0.754340 | 2.922013 | -0.423687 |

---

|   |           |           |           |
|---|-----------|-----------|-----------|
| C | -0.877808 | 1.625053  | 0.144576  |
| C | 0.318678  | 0.903571  | 0.435863  |
| C | -2.166217 | -0.447899 | 0.449368  |
| C | -1.030163 | -1.042832 | 1.140300  |
| C | 0.196079  | -0.324224 | 1.200628  |
| C | -1.149529 | -2.231403 | 1.901859  |
| C | -0.103148 | -2.694123 | 2.684867  |
| C | 1.095355  | -1.963959 | 2.763446  |
| C | 1.229293  | -0.789403 | 2.041895  |
| C | 1.556867  | 1.452235  | -0.002493 |
| C | 2.882765  | 0.817927  | -0.125462 |
| N | 3.833778  | 1.784337  | -0.163018 |
| B | 3.206386  | 3.249469  | -0.468189 |
| C | 1.666054  | 2.805300  | -0.381727 |
| C | 3.279854  | -0.550038 | -0.260326 |
| C | 4.647535  | -0.844686 | 0.026338  |
| C | 5.578377  | 0.217043  | 0.145966  |
| C | 5.147126  | 1.508195  | -0.043893 |
| C | 2.413233  | -1.634779 | -0.692970 |
| C | 2.860056  | -2.980991 | -0.518383 |
| C | 4.186720  | -3.231396 | -0.033150 |
| C | 5.065110  | -2.209272 | 0.172347  |
| C | 1.184349  | -1.429412 | -1.362874 |
| C | 0.389328  | -2.494483 | -1.750847 |
| C | 0.788736  | -3.818759 | -1.485076 |
| C | 2.015900  | -4.054442 | -0.890659 |
| C | 3.716575  | 3.694879  | -1.949706 |
| C | 3.619896  | 4.299580  | 0.703841  |
| C | -2.165375 | 0.943361  | 0.276946  |
| C | -4.218803 | -3.308603 | -0.924162 |
| C | -3.174919 | -2.599384 | -0.351575 |
| C | -3.298350 | -1.220521 | -0.042150 |
| C | -4.514850 | -0.557523 | -0.375600 |
| C | -5.565186 | -1.305024 | -0.954152 |
| C | -5.430844 | -2.659837 | -1.216036 |
| C | -3.459163 | 1.619127  | 0.208371  |
| C | -4.633519 | 0.869939  | -0.102035 |
| C | -3.616121 | 2.977075  | 0.586362  |
| C | -4.857027 | 3.594686  | 0.586318  |
| C | -6.000800 | 2.870610  | 0.211796  |
| C | -5.884447 | 1.527446  | -0.109687 |
| H | 0.527941  | 4.555966  | -0.967013 |
| H | -1.647647 | 3.455143  | -0.740650 |
| H | -2.098765 | -2.764186 | 1.920990  |
| H | -0.230282 | -3.605200 | 3.274001  |
| H | 1.906875  | -2.303757 | 3.410474  |
| H | 2.138351  | -0.198496 | 2.144531  |
| H | 6.632093  | 0.005719  | 0.330510  |
| H | 5.824209  | 2.362627  | -0.076946 |

---

|   |           |           |           |
|---|-----------|-----------|-----------|
| H | 4.501665  | -4.268229 | 0.107097  |
| H | 6.100503  | -2.407430 | 0.457064  |
| H | 0.860580  | -0.417562 | -1.594638 |
| H | -0.556180 | -2.301293 | -2.261652 |
| H | 0.145826  | -4.653339 | -1.773297 |
| H | 2.364410  | -5.076460 | -0.723937 |
| H | 3.223005  | 4.638042  | -2.244096 |
| H | 4.805579  | 3.880046  | -1.978960 |
| H | 3.483568  | 2.946901  | -2.727664 |
| H | 3.123160  | 5.271351  | 0.536628  |
| H | 3.330404  | 3.954793  | 1.711968  |
| H | 4.707555  | 4.496261  | 0.717085  |
| H | -4.087912 | -4.365636 | -1.166744 |
| H | -2.223746 | -3.101298 | -0.183717 |
| H | -2.752792 | 3.537593  | 0.938599  |
| H | -4.942968 | 4.637546  | 0.899777  |
| H | -6.981842 | 3.350780  | 0.207897  |
| H | -6.787253 | 0.962020  | -0.340579 |
| H | -6.255705 | -3.211986 | -1.671884 |
| H | -6.495375 | -0.806234 | -1.226454 |

**PMP (C2)**

$E = -1657.959043$  Hartree

| Symbol | X         | Y         | Z         |
|--------|-----------|-----------|-----------|
| C      | -0.405758 | 3.445574  | 0.541803  |
| C      | 0.802335  | 2.769337  | 0.539286  |
| C      | 0.934924  | 1.475415  | -0.036244 |
| C      | -0.253077 | 0.789154  | -0.424600 |
| C      | 2.297455  | -0.567001 | -0.422635 |
| C      | 1.063991  | -1.281253 | -0.753060 |
| C      | -0.124180 | -0.530719 | -1.005729 |
| C      | 0.943745  | -2.692013 | -0.865818 |
| C      | -0.157404 | -3.287345 | -1.459381 |
| C      | -1.183120 | -2.489626 | -1.995835 |
| C      | -1.172156 | -1.131173 | -1.739089 |
| C      | -1.511088 | 1.414828  | -0.148102 |
| C      | -2.888285 | 0.871534  | -0.110043 |
| N      | -3.766895 | 1.894283  | -0.274740 |
| B      | -3.084443 | 3.334078  | 0.009001  |
| C      | -1.584272 | 2.789337  | 0.157004  |
| C      | -3.411537 | -0.436749 | 0.153911  |
| C      | -4.767295 | -0.669216 | -0.234034 |
| C      | -5.589885 | 0.424733  | -0.599210 |
| C      | -5.077098 | 1.695991  | -0.514690 |
| C      | -2.692001 | -1.508808 | 0.823707  |
| C      | -3.258754 | -2.821656 | 0.829734  |
| C      | -4.550596 | -3.042039 | 0.248676  |
| C      | -5.296242 | -2.002295 | -0.220075 |
| C      | -1.495106 | -1.306278 | 1.549917  |

---

|   |           |           |           |
|---|-----------|-----------|-----------|
| C | -0.845984 | -2.357420 | 2.175250  |
| C | -1.368083 | -3.663248 | 2.109933  |
| C | -2.566721 | -3.884522 | 1.456192  |
| C | -3.748545 | 3.920514  | 1.376203  |
| C | -3.260548 | 4.320130  | -1.273491 |
| C | 2.232231  | 0.816075  | -0.182293 |
| C | 5.066819  | -3.173467 | -0.737098 |
| C | 3.873360  | -2.502038 | -0.954577 |
| C | 3.608133  | -1.229987 | -0.384588 |
| C | 4.707842  | -0.563378 | 0.237424  |
| C | 5.890603  | -1.289536 | 0.508235  |
| C | 6.063208  | -2.588975 | 0.060570  |
| C | 3.476049  | 1.571381  | -0.024377 |
| C | 4.656046  | 0.887287  | 0.382081  |
| C | 3.577496  | 2.959865  | -0.293040 |
| C | 4.729744  | 3.675484  | -0.008794 |
| C | 5.834563  | 3.019890  | 0.560143  |
| C | 5.800836  | 1.644750  | 0.725394  |
| H | -0.446096 | 4.477977  | 0.900882  |
| H | 1.671337  | 3.250852  | 0.979322  |
| H | 1.718163  | -3.333430 | -0.457687 |
| H | -0.212741 | -4.376024 | -1.525148 |
| H | -2.009792 | -2.940225 | -2.548697 |
| H | -2.001544 | -0.511844 | -2.076345 |
| H | -6.632672 | 0.262073  | -0.873201 |
| H | -5.681955 | 2.593137  | -0.652315 |
| H | -4.952332 | -4.058157 | 0.243417  |
| H | -6.312184 | -2.160333 | -0.587624 |
| H | -1.082790 | -0.304611 | 1.638701  |
| H | 0.079263  | -2.166162 | 2.722900  |
| H | -0.841284 | -4.489422 | 2.592349  |
| H | -3.008857 | -4.883403 | 1.430813  |
| H | -3.223450 | 4.844769  | 1.676167  |
| H | -4.813330 | 4.185050  | 1.245135  |
| H | -3.680830 | 3.215951  | 2.223573  |
| H | -4.320621 | 4.579511  | -1.449391 |
| H | -2.724921 | 5.270249  | -1.102203 |
| H | -2.863585 | 3.885583  | -2.207592 |
| H | 5.227866  | -4.152093 | -1.194902 |
| H | 3.141803  | -2.958497 | -1.613227 |
| H | 2.741369  | 3.474710  | -0.761781 |
| H | 4.776968  | 4.742959  | -0.235246 |
| H | 6.736393  | 3.579049  | 0.819302  |
| H | 6.698922  | 1.139514  | 1.079054  |
| H | 6.707886  | -0.807047 | 1.043437  |
| H | 6.989636  | -3.125715 | 0.276495  |

---

**PPM (C3)***E* = -1657.969829 Hartree

| Symbol | X         | Y         | Z         |
|--------|-----------|-----------|-----------|
| C      | 0.801802  | 3.539931  | 0.553144  |
| C      | -0.481832 | 3.014797  | 0.556064  |
| C      | -0.717146 | 1.613862  | 0.478776  |
| C      | 0.415586  | 0.757454  | 0.586330  |
| C      | -2.205144 | -0.351275 | 0.646606  |
| C      | -1.117135 | -1.046268 | 1.328689  |
| C      | 0.207691  | -0.539467 | 1.207903  |
| C      | -1.330358 | -2.161460 | 2.175947  |
| C      | -0.280486 | -2.805456 | 2.811382  |
| C      | 1.032391  | -2.333018 | 2.646633  |
| C      | 1.260869  | -1.204486 | 1.878600  |
| C      | 1.689773  | 1.313265  | 0.264037  |
| C      | 2.943887  | 0.636215  | -0.105845 |
| N      | 3.974228  | 1.509819  | 0.017663  |
| B      | 3.473342  | 3.037306  | 0.216907  |
| C      | 1.907846  | 2.703158  | 0.324125  |
| C      | 3.205982  | -0.693359 | -0.567451 |
| C      | 4.559214  | -1.141093 | -0.479006 |
| C      | 5.589121  | -0.201300 | -0.225567 |
| C      | 5.262576  | 1.123019  | -0.061334 |
| C      | 2.207668  | -1.608812 | -1.099500 |
| C      | 2.534815  | -2.996340 | -1.197345 |
| C      | 3.874014  | -3.431232 | -0.921996 |
| C      | 4.861144  | -2.533827 | -0.642026 |
| C      | 0.950832  | -1.192939 | -1.598634 |
| C      | 0.015825  | -2.108475 | -2.050311 |
| C      | 0.302226  | -3.488096 | -2.035812 |
| C      | 1.554100  | -3.919491 | -1.635238 |
| C      | 3.906813  | 3.874184  | -1.112486 |
| C      | 4.081559  | 3.650683  | 1.596346  |
| C      | -2.036372 | 0.998007  | 0.308654  |
| C      | -4.793694 | -3.064812 | 0.095696  |
| C      | -3.572794 | -2.437323 | 0.279103  |
| C      | -3.464932 | -1.024643 | 0.353228  |
| C      | -4.628622 | -0.249197 | 0.084469  |
| C      | -5.872051 | -0.912252 | -0.050192 |
| C      | -5.963292 | -2.294039 | -0.023486 |
| C      | -3.165154 | 1.734631  | -0.264991 |
| C      | -4.477196 | 1.172998  | -0.201551 |
| C      | -3.023444 | 2.982252  | -0.926849 |
| C      | -4.118430 | 3.724363  | -1.338395 |
| C      | -5.416779 | 3.238982  | -1.111174 |
| C      | -5.582839 | 1.972381  | -0.576852 |
| H      | 0.944869  | 4.614371  | 0.697293  |
| H      | -1.327632 | 3.687116  | 0.684400  |
| H      | -2.346177 | -2.499955 | 2.368911  |



---

|   |           |           |           |
|---|-----------|-----------|-----------|
| H | -0.481998 | -3.656385 | 3.465974  |
| H | 1.863835  | -2.818694 | 3.162120  |
| H | 2.265657  | -0.789710 | 1.839832  |
| H | 6.630770  | -0.522622 | -0.196690 |
| H | 6.009546  | 1.909440  | 0.052691  |
| H | 4.101128  | -4.496973 | -1.002160 |
| H | 5.895891  | -2.858738 | -0.515878 |
| H | 0.713691  | -0.133416 | -1.643240 |
| H | -0.949439 | -1.754340 | -2.418217 |
| H | -0.448004 | -4.207239 | -2.371698 |
| H | 1.814461  | -4.979886 | -1.674831 |
| H | 3.494693  | 4.897291  | -1.059779 |
| H | 5.003688  | 3.973721  | -1.202747 |
| H | 3.534660  | 3.419017  | -2.047033 |
| H | 3.664366  | 4.656224  | 1.780776  |
| H | 3.846969  | 3.033159  | 2.481002  |
| H | 5.179866  | 3.765394  | 1.549732  |
| H | -4.842351 | -4.154422 | 0.035905  |
| H | -2.671158 | -3.043728 | 0.339059  |
| H | -2.030037 | 3.361964  | -1.147982 |
| H | -3.966120 | 4.680368  | -1.844349 |
| H | -6.288725 | 3.830825  | -1.398360 |
| H | -6.592694 | 1.575695  | -0.479178 |
| H | -6.779342 | -0.333931 | -0.220477 |
| H | -6.934941 | -2.778940 | -0.141400 |

**PPP (C4)**

$E = -1657.968463$  Hartree

| Symbol | X         | Y         | Z         |
|--------|-----------|-----------|-----------|
| C      | -0.500607 | 3.446033  | -0.613671 |
| C      | 0.718643  | 2.841908  | -0.366200 |
| C      | 0.843119  | 1.425662  | -0.295648 |
| C      | -0.302859 | 0.624601  | -0.560335 |
| C      | 2.365602  | -0.492672 | -0.584304 |
| C      | 1.213860  | -1.329155 | -0.894560 |
| C      | -0.095019 | -0.758042 | -0.953045 |
| C      | 1.322983  | -2.736812 | -1.049834 |
| C      | 0.242278  | -3.517955 | -1.421187 |
| C      | -0.992441 | -2.907188 | -1.702767 |
| C      | -1.148961 | -1.555313 | -1.461579 |
| C      | -1.578181 | 1.278700  | -0.459907 |
| C      | -2.934214 | 0.739250  | -0.220643 |
| N      | -3.853013 | 1.670771  | -0.585881 |
| B      | -3.200622 | 3.131266  | -0.799571 |
| C      | -1.676848 | 2.677186  | -0.605397 |
| C      | -3.397384 | -0.487064 | 0.360659  |
| C      | -4.764431 | -0.829734 | 0.123709  |
| C      | -5.647358 | 0.141228  | -0.408565 |
| C      | -5.169715 | 1.401671  | -0.670946 |

---

|   |           |           |           |
|---|-----------|-----------|-----------|
| C | -2.589463 | -1.393794 | 1.161168  |
| C | -3.079527 | -2.712861 | 1.412224  |
| C | -4.403932 | -3.070757 | 0.995139  |
| C | -5.234341 | -2.149893 | 0.430036  |
| C | -1.365724 | -1.021506 | 1.764825  |
| C | -0.606065 | -1.934703 | 2.475786  |
| C | -1.044851 | -3.264681 | 2.628875  |
| C | -2.276444 | -3.637665 | 2.121320  |
| C | -3.502284 | 3.676697  | -2.303476 |
| C | -3.782382 | 4.104333  | 0.371492  |
| C | 2.141638  | 0.796877  | -0.088875 |
| C | 5.391650  | -2.211945 | -2.105989 |
| C | 4.077612  | -1.886603 | -1.808275 |
| C | 3.749427  | -0.900840 | -0.841434 |
| C | 4.823865  | -0.182865 | -0.238048 |
| C | 6.155281  | -0.541349 | -0.548794 |
| C | 6.444009  | -1.550848 | -1.452812 |
| C | 3.195197  | 1.442240  | 0.694436  |
| C | 4.521234  | 0.921803  | 0.663318  |
| C | 2.905815  | 2.471385  | 1.627851  |
| C | 3.885214  | 3.008561  | 2.447804  |
| C | 5.201752  | 2.524351  | 2.377186  |
| C | 5.502847  | 1.488002  | 1.507824  |
| H | -0.550713 | 4.526463  | -0.773871 |
| H | 1.618990  | 3.452325  | -0.307277 |
| H | 2.273057  | -3.223056 | -0.841288 |
| H | 0.359950  | -4.599705 | -1.515863 |
| H | -1.831516 | -3.495578 | -2.079783 |
| H | -2.110493 | -1.093778 | -1.668364 |
| H | -6.700300 | -0.097174 | -0.561626 |
| H | -5.809624 | 2.227185  | -0.984816 |
| H | -4.755091 | -4.086327 | 1.192849  |
| H | -6.268475 | -2.401156 | 0.185930  |
| H | -1.016006 | 0.003750  | 1.682582  |
| H | 0.338795  | -1.616183 | 2.921262  |
| H | -0.430848 | -3.985581 | 3.172982  |
| H | -2.658304 | -4.649216 | 2.278669  |
| H | -2.978527 | 4.633479  | -2.474341 |
| H | -4.578814 | 3.869856  | -2.463140 |
| H | -3.167861 | 2.976674  | -3.088983 |
| H | -3.272416 | 5.082928  | 0.328607  |
| H | -3.625395 | 3.697488  | 1.385835  |
| H | -4.863431 | 4.300366  | 0.253466  |
| H | 5.602308  | -2.966194 | -2.867604 |
| H | 3.284407  | -2.368204 | -2.374500 |
| H | 1.881408  | 2.819714  | 1.742254  |
| H | 3.622895  | 3.790464  | 3.164050  |
| H | 5.978306  | 2.938230  | 3.024302  |
| H | 6.516000  | 1.086633  | 1.500025  |

---

|   |          |           |           |
|---|----------|-----------|-----------|
| H | 7.482339 | -1.801242 | -1.681306 |
| H | 6.979593 | 0.008642  | -0.095211 |

**TS1** $E = -1657.964903$  Hartree

| Symbol | X         | Y         | Z         |
|--------|-----------|-----------|-----------|
| C      | 0.851302  | 3.659423  | 0.060877  |
| C      | -0.438891 | 3.167776  | 0.212718  |
| C      | -0.729889 | 1.783509  | 0.390835  |
| C      | 0.421999  | 0.943963  | 0.544521  |
| C      | -2.106217 | -0.248117 | 0.648031  |
| C      | -1.014098 | -0.857630 | 1.395051  |
| C      | 0.272630  | -0.279727 | 1.306214  |
| C      | -1.207743 | -1.949821 | 2.275088  |
| C      | -0.154937 | -2.478208 | 3.005940  |
| C      | 1.128093  | -1.912553 | 2.899266  |
| C      | 1.329402  | -0.817539 | 2.075877  |
| C      | -2.064589 | 1.131381  | 0.362801  |
| C      | -4.101293 | -3.272666 | -0.429699 |
| C      | -3.063794 | -2.486324 | 0.039046  |
| C      | -3.209702 | -1.082449 | 0.199729  |
| C      | -4.428947 | -0.480853 | -0.198557 |
| C      | -5.481976 | -1.306980 | -0.661657 |
| C      | -5.332066 | -2.679609 | -0.763562 |
| C      | -3.344395 | 1.773162  | -0.010756 |
| C      | -4.524860 | 0.970475  | -0.176470 |
| C      | -3.530466 | 3.172161  | -0.175141 |
| C      | -4.767149 | 3.755375  | -0.401176 |
| C      | -5.917794 | 2.961513  | -0.483142 |
| C      | -5.780134 | 1.589961  | -0.379262 |
| C      | 1.686418  | 1.417535  | 0.095694  |
| C      | 1.943164  | 2.790281  | -0.063504 |
| C      | 2.910443  | 0.653744  | -0.199824 |
| C      | 5.242525  | 1.059155  | -0.246128 |
| C      | 3.118623  | -0.732523 | -0.483692 |
| C      | 5.519898  | -0.286582 | -0.222913 |
| C      | 4.455031  | -1.214531 | -0.343614 |
| C      | 4.703084  | -2.627154 | -0.330878 |
| C      | 3.682947  | -3.513989 | -0.509455 |
| C      | 2.362590  | -3.065530 | -0.847553 |
| C      | 2.085044  | -1.665324 | -0.905009 |
| C      | 1.353882  | -3.995706 | -1.199377 |
| C      | 0.846314  | -1.260840 | -1.456689 |
| C      | 0.125577  | -3.566100 | -1.668415 |
| C      | -0.111945 | -2.186602 | -1.830109 |
| B      | 3.515358  | 3.058963  | -0.246073 |
| N      | 3.969064  | 1.500063  | -0.213685 |
| H      | -2.208675 | -2.356850 | 2.412728  |

---

|   |           |           |           |
|---|-----------|-----------|-----------|
| H | -0.332825 | -3.311033 | 3.689982  |
| H | 1.954615  | -2.305877 | 3.495131  |
| H | 2.304966  | -0.334652 | 2.059300  |
| H | -3.953621 | -4.347365 | -0.558136 |
| H | -2.102071 | -2.950427 | 0.245758  |
| H | -6.422334 | -0.861388 | -0.983062 |
| H | -6.156764 | -3.291811 | -1.135380 |
| H | -2.699255 | 3.853826  | -0.120241 |
| H | -4.832778 | 4.840950  | -0.503204 |
| H | -6.901904 | 3.410445  | -0.633497 |
| H | -6.672020 | 0.969227  | -0.450212 |
| H | 6.018072  | 1.825961  | -0.251440 |
| H | 6.549797  | -0.638707 | -0.155441 |
| H | 5.724539  | -2.973445 | -0.161030 |
| H | 3.870375  | -4.589408 | -0.462598 |
| H | 1.575419  | -5.062690 | -1.120436 |
| H | 0.644255  | -0.203575 | -1.608611 |
| H | -0.645872 | -4.289542 | -1.940919 |
| H | -1.060051 | -1.841647 | -2.246679 |
| H | 0.998091  | 4.741836  | 0.007434  |
| H | -1.218670 | 3.912467  | 0.257063  |
| C | 3.950846  | 3.664719  | -1.694205 |
| H | 3.570393  | 4.696464  | -1.795534 |
| H | 5.048457  | 3.714153  | -1.812633 |
| H | 3.549194  | 3.083013  | -2.542318 |
| C | 4.165074  | 3.857149  | 1.014180  |
| H | 5.265588  | 3.925823  | 0.937924  |
| H | 3.783264  | 4.892753  | 1.044941  |
| H | 3.925577  | 3.392708  | 1.986779  |

## TS2

$E = -1657.957163$  Hartree

| Symbol | X         | Y         | Z         |
|--------|-----------|-----------|-----------|
| C      | 1.228890  | -2.688957 | -1.568055 |
| C      | 0.122990  | -3.377542 | -2.040864 |
| C      | -1.124112 | -2.746724 | -2.109728 |
| C      | -1.226065 | -1.456044 | -1.633295 |
| C      | -2.934779 | 0.700003  | -0.118995 |
| N      | -3.885016 | 1.622437  | -0.416812 |
| B      | -3.260709 | 3.084486  | -0.703803 |
| C      | -3.338450 | -0.542676 | 0.469664  |
| C      | -4.713098 | -0.901233 | 0.321183  |
| C      | -5.643412 | 0.067396  | -0.129971 |
| C      | -5.201646 | 1.337107  | -0.410242 |
| C      | -2.462415 | -1.451055 | 1.193168  |
| C      | -2.913929 | -2.782976 | 1.448595  |
| C      | -4.258483 | -3.153990 | 1.114422  |
| C      | -5.140844 | -2.234802 | 0.630789  |

---

|   |           |           |           |
|---|-----------|-----------|-----------|
| C | -1.211807 | -1.066551 | 1.731224  |
| C | -0.397731 | -1.976183 | 2.384110  |
| C | -0.803228 | -3.316699 | 2.537982  |
| C | -2.053853 | -3.705031 | 2.092496  |
| C | 5.601648  | -2.558031 | -1.224443 |
| C | 4.255947  | -2.262962 | -1.064685 |
| C | 6.161722  | -0.384522 | -0.418279 |
| C | 6.576643  | -1.597640 | -0.934769 |
| C | 2.094695  | 0.757840  | -0.211476 |
| C | 2.350264  | -0.567934 | -0.614418 |
| C | 3.772320  | -1.004427 | -0.612185 |
| C | 4.797434  | -0.081120 | -0.206250 |
| C | 4.443351  | 1.134231  | 0.509896  |
| C | 3.081620  | 1.514907  | 0.554488  |
| C | 0.812829  | 1.402233  | -0.464333 |
| C | -0.338399 | 0.601202  | -0.622867 |
| C | -0.129509 | -0.761821 | -1.069150 |
| C | 1.184332  | -1.350871 | -1.089632 |
| C | 0.686283  | 2.813403  | -0.605979 |
| C | -0.550931 | 3.407580  | -0.778883 |
| C | -1.722068 | 2.642029  | -0.631274 |
| C | -1.606417 | 1.249651  | -0.452063 |
| C | 5.393033  | 1.889175  | 1.239983  |
| C | 5.009866  | 2.956639  | 2.034480  |
| C | 3.647241  | 3.278479  | 2.155841  |
| C | 2.705904  | 2.565428  | 1.433383  |
| H | 2.146534  | -3.247788 | -1.589406 |
| H | 0.247354  | -4.405901 | -2.387549 |
| H | -1.992823 | -3.251505 | -2.537106 |
| H | -2.177821 | -0.940768 | -1.723995 |
| H | -6.701437 | -0.183063 | -0.212359 |
| H | -5.872513 | 2.156092  | -0.672203 |
| H | -4.580095 | -4.178998 | 1.313620  |
| H | -6.185883 | -2.497831 | 0.455011  |
| H | -0.885950 | -0.033329 | 1.649269  |
| H | 0.564087  | -1.646638 | 2.782813  |
| H | -0.147110 | -4.034587 | 3.034898  |
| H | -2.407704 | -4.726183 | 2.253494  |
| H | 5.886448  | -3.546996 | -1.590647 |
| H | 3.588727  | -3.069197 | -1.311873 |
| H | 1.589164  | 3.422589  | -0.641237 |
| H | -0.616497 | 4.479235  | -0.985363 |
| H | 6.444585  | 1.606563  | 1.220540  |
| H | 5.761434  | 3.514589  | 2.597539  |
| H | 3.325418  | 4.073046  | 2.832670  |
| H | 1.651917  | 2.796392  | 1.574501  |
| C | -3.747015 | 4.072162  | 0.497984  |

---

|   |           |           |           |
|---|-----------|-----------|-----------|
| H | -3.252670 | 5.054307  | 0.395827  |
| H | -4.836238 | 4.256422  | 0.471524  |
| H | -3.498364 | 3.683041  | 1.500885  |
| C | -3.693492 | 3.603703  | -2.184714 |
| H | -4.780359 | 3.792044  | -2.254593 |
| H | -3.189648 | 4.558584  | -2.415628 |
| H | -3.425191 | 2.891451  | -2.984495 |
| H | 7.637532  | -1.802641 | -1.092727 |
| H | 6.913799  | 0.361311  | -0.165515 |

### En-TS3

$E = -1657.919542$  Hartree

| Symbol | X         | Y         | Z         |
|--------|-----------|-----------|-----------|
| C      | -3.624874 | -3.387194 | -1.836026 |
| C      | -2.768305 | -2.712854 | -0.981071 |
| C      | -3.069902 | -1.408558 | -0.513976 |
| C      | -4.270368 | -0.782627 | -0.957677 |
| C      | -5.124109 | -1.491518 | -1.832653 |
| C      | -4.816798 | -2.773961 | -2.261003 |
| C      | -3.579233 | 1.303503  | 0.220130  |
| C      | -4.584612 | 0.552784  | -0.463596 |
| C      | -3.966281 | 2.522317  | 0.834724  |
| C      | -5.248841 | 3.031215  | 0.704713  |
| C      | -6.208096 | 2.332244  | -0.046233 |
| C      | -5.878304 | 1.106009  | -0.600733 |
| C      | 0.546476  | -2.016213 | 3.271012  |
| C      | -0.467973 | -2.873324 | 2.820766  |
| C      | 0.805189  | -0.837996 | 2.585715  |
| C      | -1.269388 | -2.500708 | 1.748630  |
| C      | 0.051235  | -0.472489 | 1.456410  |
| C      | -1.067106 | -1.268313 | 1.083982  |
| C      | 0.209909  | 0.839049  | 0.844869  |
| C      | -2.118535 | -0.654628 | 0.279775  |
| C      | -2.243055 | 0.736105  | 0.389015  |
| C      | -1.025406 | 1.529491  | 0.609851  |
| C      | 1.435376  | 1.518263  | 0.545153  |
| C      | -0.984333 | 2.932132  | 0.427647  |
| C      | 1.426099  | 2.932306  | 0.463214  |
| C      | 0.213787  | 3.627871  | 0.490815  |
| C      | 3.828803  | 3.829432  | 1.313673  |
| C      | 2.817839  | 4.719254  | -1.044604 |
| C      | 2.675048  | 1.037611  | -0.161213 |
| C      | 4.147896  | 2.095622  | -1.712707 |
| C      | 3.059475  | -0.239298 | -0.704956 |
| C      | 4.207032  | 0.974136  | -2.502754 |
| C      | 3.627210  | -0.219289 | -2.017523 |
| C      | 3.627532  | -1.420116 | -2.808087 |
| C      | 3.237641  | -2.610354 | -2.271659 |

---

|   |           |           |           |
|---|-----------|-----------|-----------|
| C | 3.020777  | -2.722616 | -0.856798 |
| C | 3.001230  | -1.537569 | -0.055858 |
| C | 3.012947  | -3.988862 | -0.228279 |
| C | 3.190749  | -1.677800 | 1.333022  |
| C | 3.130951  | -4.093448 | 1.148572  |
| C | 3.272486  | -2.928981 | 1.923910  |
| B | 2.858592  | 3.512593  | 0.037214  |
| N | 3.345951  | 2.126714  | -0.629956 |
| H | -3.361814 | -4.384959 | -2.194554 |
| H | -1.822430 | -3.174161 | -0.698998 |
| H | -3.260875 | 3.046273  | 1.475353  |
| H | -5.514353 | 3.964291  | 1.206822  |
| H | -7.219188 | 2.729684  | -0.159012 |
| H | -6.650557 | 0.541262  | -1.122782 |
| H | 1.127395  | -2.270169 | 4.159687  |
| H | -0.673312 | -3.806958 | 3.349499  |
| H | 1.565186  | -0.147050 | 2.949737  |
| H | -2.128078 | -3.118641 | 1.487844  |
| H | -1.891049 | 3.477451  | 0.181036  |
| H | 0.210375  | 4.716056  | 0.389167  |
| H | 4.859253  | 4.057359  | 0.986145  |
| H | 3.461542  | 4.711681  | 1.866272  |
| H | 3.881233  | 2.990499  | 2.029329  |
| H | 2.327337  | 5.600116  | -0.593627 |
| H | 3.823323  | 5.055770  | -1.355891 |
| H | 2.251097  | 4.467381  | -1.958538 |
| H | 4.642981  | 3.030588  | -1.971514 |
| H | 4.718541  | 0.993773  | -3.465548 |
| H | 3.949004  | -1.349754 | -3.849372 |
| H | 3.209874  | -3.515808 | -2.882424 |
| H | 2.986590  | -4.885437 | -0.852289 |
| H | 3.334673  | -0.782303 | 1.933956  |
| H | 3.163416  | -5.075825 | 1.624739  |
| H | 3.442644  | -3.007819 | 2.999027  |
| H | -6.036870 | -1.020114 | -2.197176 |
| H | -5.491555 | -3.296931 | -2.942430 |

**TS3a**

$E = -1657.908865$  Hartree

| Symbol | X         | Y         | Z         |
|--------|-----------|-----------|-----------|
| C      | -5.788463 | 2.408131  | -0.836708 |
| C      | -4.439165 | 2.102034  | -0.921924 |
| C      | -3.878720 | 0.970624  | -0.272607 |
| C      | -4.781553 | 0.083351  | 0.387365  |
| C      | -6.150028 | 0.427141  | 0.477456  |
| C      | -6.651538 | 1.580758  | -0.102113 |
| C      | -2.991049 | -1.628763 | 0.518023  |
| C      | -4.285795 | -1.183065 | 0.910544  |

---

|   |           |           |           |
|---|-----------|-----------|-----------|
| C | -2.514942 | -2.852542 | 1.057882  |
| C | -3.291946 | -3.626988 | 1.903727  |
| C | -4.580328 | -3.196967 | 2.262090  |
| C | -5.055996 | -1.987929 | 1.780513  |
| C | 0.474997  | 3.222163  | -2.059033 |
| C | -0.661945 | 3.775299  | -1.449939 |
| C | 0.756270  | 1.881961  | -1.862307 |
| C | -1.584883 | 2.942829  | -0.835310 |
| C | -0.108208 | 1.038499  | -1.134073 |
| C | -1.409225 | 1.535158  | -0.789722 |
| C | 0.231254  | -0.359481 | -0.959911 |
| C | -2.462445 | 0.604407  | -0.402112 |
| C | -2.128062 | -0.748382 | -0.267113 |
| C | -0.871620 | -1.244335 | -0.819876 |
| C | 1.537985  | -0.980677 | -1.056609 |
| C | -0.764435 | -2.559776 | -1.343054 |
| C | 1.609730  | -2.291505 | -1.576347 |
| C | 0.437506  | -3.013979 | -1.855172 |
| C | 3.984632  | -2.552771 | -2.841367 |
| C | 3.206340  | -4.427665 | -1.038057 |
| C | 2.798101  | -0.738649 | -0.275960 |
| C | 4.412938  | -2.237767 | 0.641452  |
| C | 3.146488  | 0.216440  | 0.746446  |
| C | 4.435374  | -1.562595 | 1.837541  |
| C | 3.762846  | -0.322219 | 1.918424  |
| C | 3.712301  | 0.422735  | 3.147715  |
| C | 3.227250  | 1.695930  | 3.174482  |
| C | 2.970139  | 2.389581  | 1.943161  |
| C | 3.008117  | 1.662579  | 0.711780  |
| C | 2.879378  | 3.800160  | 1.917227  |
| C | 3.192599  | 2.396227  | -0.478190 |
| C | 2.982479  | 4.491885  | 0.720609  |
| C | 3.198079  | 3.782578  | -0.474356 |
| B | 3.102495  | -2.878745 | -1.505087 |
| N | 3.561849  | -1.867207 | -0.335836 |
| H | -0.843219 | 4.851803  | -1.487581 |
| H | 3.617538  | -3.143443 | -3.698585 |
| H | 5.046437  | -2.820411 | -2.693738 |
| H | 3.942389  | -1.488567 | -3.131478 |
| H | 2.805795  | 4.339646  | 2.864594  |
| H | 3.401351  | 1.856334  | -1.399767 |
| H | 2.953138  | 5.583640  | 0.712364  |
| H | 3.372345  | 4.324566  | -1.405686 |
| H | -3.814443 | 2.722121  | -1.557264 |
| H | -6.177491 | 3.281300  | -1.365499 |
| H | -1.497828 | -3.174349 | 0.844295  |
| H | -2.888109 | -4.557041 | 2.310070  |



---

|   |           |           |           |
|---|-----------|-----------|-----------|
| H | -5.195017 | -3.796071 | 2.937621  |
| H | -6.039326 | -1.645909 | 2.102139  |
| H | 2.732997  | -5.073043 | -1.799053 |
| H | 2.695260  | -4.630523 | -0.080125 |
| H | -1.653113 | -3.190071 | -1.384452 |
| H | 0.496523  | -3.997902 | -2.326653 |
| H | 1.639930  | 1.434773  | -2.310526 |
| H | 1.151137  | 3.846645  | -2.644710 |
| H | 3.156754  | 2.247530  | 4.114923  |
| H | 4.069868  | -0.063523 | 4.057839  |
| H | 4.988046  | -1.953820 | 2.692238  |
| H | 4.979205  | -3.151348 | 0.465335  |
| H | 4.248987  | -4.781086 | -0.942710 |
| H | -2.465403 | 3.388521  | -0.381404 |
| H | -6.840689 | -0.248521 | 0.981153  |
| H | -7.715219 | 1.816414  | -0.024524 |

#### En-TS4

$E = -1657.957448$  Hartree

| Symbol | X         | Y         | Z         |
|--------|-----------|-----------|-----------|
| C      | -1.498056 | 1.431597  | 0.045052  |
| C      | -2.869318 | 0.882285  | -0.017788 |
| N      | -3.755440 | 1.909615  | 0.030557  |
| B      | -3.058550 | 3.333625  | -0.301981 |
| C      | -1.550060 | 2.790334  | -0.325611 |
| C      | -3.372645 | -0.448208 | -0.188535 |
| C      | -4.740751 | -0.658955 | 0.165081  |
| C      | -5.584069 | 0.456070  | 0.395616  |
| C      | -5.074709 | 1.720511  | 0.226485  |
| C      | -2.620172 | -1.566661 | -0.735104 |
| C      | -3.174611 | -2.881403 | -0.641976 |
| C      | -4.484257 | -3.063372 | -0.087341 |
| C      | -5.257186 | -1.994121 | 0.254115  |
| C      | -1.405888 | -1.413686 | -1.444180 |
| C      | -0.731753 | -2.506919 | -1.961958 |
| C      | -1.242670 | -3.808040 | -1.796029 |
| C      | -2.455136 | -3.986458 | -1.154222 |
| C      | 2.216271  | 0.790117  | 0.260521  |
| C      | 2.260422  | -0.607713 | 0.449761  |
| C      | 3.551224  | -1.285988 | 0.197653  |
| C      | 4.644938  | -0.534064 | -0.349075 |
| C      | 4.647113  | 0.916111  | -0.221186 |
| C      | 3.457179  | 1.556179  | 0.204033  |
| C      | 0.945593  | 1.482025  | 0.071836  |
| C      | -0.260725 | 0.819613  | 0.413786  |
| C      | -0.155065 | -0.450957 | 1.095072  |
| C      | 1.015623  | -1.256433 | 0.907266  |
| C      | 0.861467  | 2.768796  | -0.529916 |

---

|   |           |           |           |
|---|-----------|-----------|-----------|
| C | -0.345460 | 3.438958  | -0.640960 |
| C | 5.825429  | 1.686576  | -0.366576 |
| C | 5.853733  | 3.029933  | -0.028937 |
| C | 4.705142  | 3.637387  | 0.507403  |
| C | 3.531738  | 2.909729  | 0.619973  |
| C | 4.954450  | -3.300049 | -0.061269 |
| C | 3.812126  | -2.666978 | 0.406160  |
| C | 5.774176  | -1.203939 | -0.871037 |
| C | 5.926239  | -2.575256 | -0.763315 |
| C | 0.851329  | -2.625525 | 1.255089  |
| C | -0.254019 | -3.098241 | 1.945769  |
| C | -1.270069 | -2.220016 | 2.349472  |
| C | -1.220792 | -0.916401 | 1.895642  |
| H | -6.636939 | 0.308579  | 0.637824  |
| H | -5.689488 | 2.620623  | 0.264806  |
| H | -4.876589 | -4.079654 | -0.002331 |
| H | -6.285072 | -2.130451 | 0.596368  |
| H | -1.000662 | -0.418314 | -1.607941 |
| H | 0.205470  | -2.352817 | -2.500894 |
| H | -0.696247 | -4.666620 | -2.192432 |
| H | -2.888325 | -4.984511 | -1.053894 |
| H | 1.764207  | 3.244461  | -0.906475 |
| H | -0.360055 | 4.462087  | -1.027464 |
| H | 6.747755  | 1.211773  | -0.699345 |
| H | 6.780086  | 3.599026  | -0.134671 |
| H | 4.737717  | 4.674337  | 0.848979  |
| H | 2.657729  | 3.379115  | 1.068730  |
| H | 5.085512  | -4.368515 | 0.124401  |
| H | 3.133112  | -3.277599 | 0.979855  |
| H | 1.578775  | -3.367174 | 0.964826  |
| H | -0.312389 | -4.161283 | 2.189639  |
| H | -2.103742 | -2.565956 | 2.963681  |
| H | -2.027846 | -0.227402 | 2.140145  |
| C | -3.639372 | 3.831338  | -1.740358 |
| H | -4.712048 | 4.091964  | -1.690987 |
| H | -3.102734 | 4.741422  | -2.062308 |
| H | -3.514677 | 3.078337  | -2.538107 |
| C | -3.316314 | 4.394177  | 0.904958  |
| H | -2.770763 | 5.334095  | 0.710232  |
| H | -4.385266 | 4.659894  | 0.997966  |
| H | -2.978802 | 4.018417  | 1.886772  |
| H | 6.807037  | -3.070176 | -1.177913 |
| H | 6.558495  | -0.623218 | -1.355670 |

---

**TS5** $E = -1657.918035$  Hartree

| Symbol | X         | Y         | Z         |
|--------|-----------|-----------|-----------|
| C      | -0.740340 | -2.726632 | -2.699415 |
| C      | 0.477787  | -3.373301 | -2.450318 |
| C      | -0.979688 | -1.482616 | -2.137914 |
| C      | 1.441429  | -2.751808 | -1.667332 |
| C      | -0.048225 | -0.859500 | -1.285819 |
| C      | 1.213898  | -1.489491 | -1.071472 |
| C      | -0.234862 | 0.542055  | -0.940814 |
| C      | 2.270809  | -0.731641 | -0.406730 |
| C      | 2.201254  | 0.664497  | -0.465854 |
| C      | 0.973176  | 1.302089  | -0.958649 |
| C      | -1.466157 | 1.278744  | -0.796041 |
| C      | 0.901292  | 2.626613  | -1.459962 |
| C      | -1.481418 | 2.652071  | -1.130615 |
| C      | -0.320491 | 3.255741  | -1.638300 |
| C      | -4.005081 | 3.480341  | -1.712202 |
| C      | -2.534922 | 4.783000  | 0.167238  |
| C      | -2.628829 | 1.011179  | 0.107218  |
| C      | -3.855391 | 2.410128  | 1.591454  |
| C      | -3.037050 | -0.129410 | 0.879026  |
| C      | -3.878989 | 1.437530  | 2.563643  |
| C      | -3.451082 | 0.133946  | 2.220304  |
| C      | -3.459597 | -0.943081 | 3.173551  |
| C      | -3.228723 | -2.227975 | 2.779024  |
| C      | -3.179969 | -2.556315 | 1.380836  |
| C      | -3.162488 | -1.499471 | 0.419607  |
| C      | -3.330492 | -3.891728 | 0.939985  |
| C      | -3.531832 | -1.804281 | -0.907720 |
| C      | -3.603723 | -4.169523 | -0.390153 |
| C      | -3.759622 | -3.111811 | -1.305684 |
| B      | -2.809716 | 3.382268  | -0.603762 |
| N      | -3.198657 | 2.204058  | 0.432497  |
| C      | 4.502558  | -3.385712 | 1.112266  |
| C      | 3.380215  | -2.747958 | 0.611523  |
| C      | 3.414043  | -1.387691 | 0.210359  |
| C      | 4.603254  | -0.643028 | 0.454090  |
| C      | 5.748829  | -1.327980 | 0.926182  |
| C      | 5.711542  | -2.678035 | 1.232738  |
| C      | 3.321185  | 1.455836  | 0.047788  |
| C      | 4.561519  | 0.810556  | 0.344437  |
| C      | 3.231755  | 2.848009  | 0.311557  |
| C      | 4.336300  | 3.599296  | 0.677299  |
| C      | 5.590636  | 2.980518  | 0.807457  |
| C      | 5.686355  | 1.606490  | 0.667369  |
| H      | -1.480194 | -3.175591 | -3.364711 |
| H      | 0.696432  | -4.337164 | -2.915547 |

---

|   |           |           |           |
|---|-----------|-----------|-----------|
| H | -1.861624 | -0.920643 | -2.426861 |
| H | 2.418583  | -3.220807 | -1.572004 |
| H | 1.820093  | 3.153573  | -1.711877 |
| H | -0.353564 | 4.276361  | -2.028175 |
| H | -3.733448 | 4.201401  | -2.502854 |
| H | -4.212297 | 2.513971  | -2.204071 |
| H | -4.947673 | 3.835984  | -1.258475 |
| H | -3.454663 | 5.231145  | 0.585152  |
| H | -2.126587 | 5.522776  | -0.543709 |
| H | -1.804490 | 4.689264  | 0.990401  |
| H | -4.269378 | 3.407274  | 1.738139  |
| H | -4.266808 | 1.652006  | 3.559934  |
| H | -3.656588 | -0.703194 | 4.220634  |
| H | -3.205046 | -3.039265 | 3.510502  |
| H | -3.298180 | -4.696470 | 1.678409  |
| H | -3.693022 | -0.985614 | -1.608350 |
| H | -3.752464 | -5.201344 | -0.715882 |
| H | -4.062972 | -3.319991 | -2.333784 |
| H | 4.443255  | -4.432429 | 1.418955  |
| H | 2.443350  | -3.298342 | 0.547768  |
| H | 2.266620  | 3.343273  | 0.254998  |
| H | 4.224411  | 4.668460  | 0.871088  |
| H | 6.475319  | 3.567737  | 1.063541  |
| H | 6.650304  | 1.130844  | 0.843750  |
| H | 6.677723  | -0.783173 | 1.090076  |
| H | 6.608898  | -3.177686 | 1.604547  |

### TS6

$E = -1657.951589$  Hartree

| Symbol | X         | Y         | Z         |
|--------|-----------|-----------|-----------|
| N      | -3.990852 | 1.488724  | -0.292765 |
| B      | -3.510204 | 3.031611  | -0.405773 |
| C      | -2.952993 | 0.640567  | -0.080761 |
| C      | -3.226867 | -0.666893 | 0.438604  |
| C      | -4.562260 | -1.146154 | 0.275521  |
| C      | -5.585311 | -0.248510 | -0.120065 |
| C      | -5.273440 | 1.075703  | -0.307248 |
| C      | -2.267747 | -1.514527 | 1.130709  |
| C      | -2.602389 | -2.885223 | 1.361621  |
| C      | -3.902013 | -3.371090 | 0.999519  |
| C      | -4.861761 | -2.525598 | 0.529128  |
| C      | -1.051332 | -1.035802 | 1.672159  |
| C      | -0.168870 | -1.881781 | 2.322498  |
| C      | -0.464912 | -3.250857 | 2.467892  |
| C      | -1.674128 | -3.737952 | 2.005241  |
| C      | 3.423067  | 3.122942  | 0.468316  |
| C      | 4.421295  | 3.648770  | 1.276524  |
| C      | 5.361327  | 2.802367  | 1.877463  |

---

|   |           |           |           |
|---|-----------|-----------|-----------|
| C | 5.352288  | 1.461888  | 1.532663  |
| C | -0.821715 | 3.575107  | -0.365546 |
| C | 0.460425  | 3.055032  | -0.294551 |
| C | -1.689587 | 1.343687  | -0.384419 |
| C | -1.936212 | 2.725967  | -0.373095 |
| C | 2.238097  | -0.297550 | -0.733552 |
| C | 2.098231  | 1.059789  | -0.376958 |
| C | 0.749260  | 1.665087  | -0.436924 |
| C | -0.385171 | 0.822565  | -0.664431 |
| C | -0.198113 | -0.517364 | -1.166177 |
| C | 1.080932  | -1.121168 | -1.058352 |
| C | 3.573938  | -0.896179 | -0.795787 |
| C | 4.592978  | -0.381140 | 0.042156  |
| C | 4.385535  | 0.924769  | 0.654012  |
| C | 3.285185  | 1.732719  | 0.212820  |
| C | 3.915398  | -1.936632 | -1.694976 |
| C | 5.157476  | -2.551540 | -1.655919 |
| C | 6.110655  | -2.138591 | -0.710508 |
| C | 5.837115  | -1.051726 | 0.104681  |
| C | -1.256706 | -1.246170 | -1.762244 |
| C | -1.136569 | -2.594605 | -2.034437 |
| C | 0.050684  | -3.259797 | -1.674564 |
| C | 1.135185  | -2.534573 | -1.214262 |
| H | -6.614172 | -0.596414 | -0.217251 |
| H | -6.023914 | 1.842958  | -0.501372 |
| H | -4.128214 | -4.426714 | 1.167987  |
| H | -5.875728 | -2.880203 | 0.333328  |
| H | -0.808661 | 0.020763  | 1.599309  |
| H | 0.762478  | -1.478082 | 2.725379  |
| H | 0.243822  | -3.915789 | 2.966263  |
| H | -1.942118 | -4.787100 | 2.151188  |
| H | 2.773884  | 3.844273  | -0.003143 |
| H | 4.463065  | 4.728363  | 1.437224  |
| H | 6.118697  | 3.195497  | 2.558956  |
| H | 6.131235  | 0.810148  | 1.927328  |
| H | -0.954039 | 4.660669  | -0.354863 |
| H | 1.250030  | 3.777036  | -0.178047 |
| H | 3.202270  | -2.240465 | -2.458374 |
| H | 5.394706  | -3.343591 | -2.369694 |
| H | 7.084718  | -2.629942 | -0.656423 |
| H | 6.624261  | -0.677603 | 0.758360  |
| H | -2.183985 | -0.731501 | -2.004944 |
| H | -1.966728 | -3.141437 | -2.486377 |
| H | 0.129062  | -4.344412 | -1.776525 |
| H | 2.040604  | -3.071690 | -0.946405 |
| C | -3.990249 | 3.677086  | -1.820358 |
| H | -5.090753 | 3.760282  | -1.882173 |

---

|   |           |          |           |
|---|-----------|----------|-----------|
| H | -3.587442 | 4.699276 | -1.929483 |
| H | -3.649193 | 3.096920 | -2.695598 |
| C | -4.090278 | 3.817858 | 0.897713  |
| H | -3.689550 | 4.846784 | 0.918933  |
| H | -5.191863 | 3.902898 | 0.879251  |
| H | -3.808189 | 3.337068 | 1.850749  |

**(P)-Azabora[5]helicene H1**

*E* = -890.224773 Hartree

| Symbol | X         | Y         | Z         |
|--------|-----------|-----------|-----------|
| C      | -0.463572 | -0.452039 | 0.013530  |
| C      | 0.938334  | -0.743991 | -0.045332 |
| C      | 1.289899  | -2.113525 | -0.259176 |
| C      | 0.300112  | -3.127164 | -0.166394 |
| C      | -1.015429 | -2.817632 | 0.123685  |
| C      | 2.024056  | 0.206291  | 0.152231  |
| C      | 3.359835  | -0.171559 | -0.197156 |
| C      | 3.632307  | -1.519445 | -0.605162 |
| C      | 2.648293  | -2.461971 | -0.568431 |
| C      | 4.188068  | 2.011774  | 0.506573  |
| C      | 2.896017  | 2.344982  | 0.962793  |
| B      | -2.901515 | -0.866253 | 0.345939  |
| C      | -3.969500 | -1.369643 | -0.774373 |
| C      | 1.845694  | 1.458830  | 0.792436  |
| C      | 4.413482  | 0.764609  | -0.047108 |
| H      | 0.868949  | 1.716891  | 1.197746  |
| H      | 5.011978  | 2.718827  | 0.627410  |
| H      | 5.421482  | 0.467620  | -0.347781 |
| H      | 4.656545  | -1.788861 | -0.873779 |
| H      | 2.872844  | -3.508403 | -0.789723 |
| H      | 0.609579  | -4.165941 | -0.311127 |
| H      | -1.752490 | -3.616002 | 0.248005  |
| H      | -4.157740 | -2.450736 | -0.650340 |
| H      | -3.612841 | -1.218082 | -1.808421 |
| H      | -4.947888 | -0.864316 | -0.680846 |
| C      | -3.462643 | -0.974847 | 1.871421  |
| H      | -3.654805 | -2.030017 | 2.133331  |
| H      | -4.418860 | -0.434038 | 1.994362  |
| H      | -2.754289 | -0.576568 | 2.618795  |
| C      | -3.373717 | 1.677479  | -0.131527 |
| C      | -2.962395 | 2.922795  | -0.583824 |
| C      | -1.611045 | 3.090212  | -0.914776 |
| C      | -1.171071 | 0.821380  | -0.207476 |
| C      | -0.714208 | 2.043385  | -0.730082 |
| H      | -4.417768 | 1.452212  | 0.092711  |
| H      | 0.331466  | 2.162071  | -1.001509 |
| H      | 2.723337  | 3.298354  | 1.467441  |
| H      | -3.686656 | 3.728438  | -0.705100 |
| H      | -1.258217 | 4.039312  | -1.323807 |

---

|   |           |           |          |
|---|-----------|-----------|----------|
| C | -1.422815 | -1.470579 | 0.176123 |
| N | -2.506466 | 0.669210  | 0.025013 |

**TS-Azabora[5]helicene H1***E* = -890.202094 Hartree

| Symbol | X         | Y         | Z         |
|--------|-----------|-----------|-----------|
| C      | -0.443810 | -0.338990 | -0.182874 |
| C      | 0.997681  | -0.625808 | -0.173217 |
| C      | 1.348472  | -2.026419 | -0.169022 |
| C      | 0.380527  | -3.056128 | -0.263538 |
| C      | -0.956046 | -2.759265 | -0.246186 |
| C      | 2.151856  | 0.289598  | -0.088854 |
| C      | 3.475984  | -0.216099 | 0.170077  |
| C      | 3.724481  | -1.620350 | 0.212171  |
| C      | 2.699725  | -2.480877 | -0.002468 |
| C      | 4.427991  | 2.036027  | 0.209315  |
| C      | 3.162170  | 2.544394  | -0.127529 |
| B      | -2.869769 | -0.995053 | 0.094192  |
| C      | -3.863618 | -1.303442 | -1.163045 |
| C      | 2.083591  | 1.688168  | -0.271337 |
| C      | 4.570956  | 0.668607  | 0.337006  |
| H      | 1.154158  | 2.116380  | -0.580317 |
| H      | 5.283472  | 2.702800  | 0.337856  |
| H      | 5.549728  | 0.233354  | 0.553406  |
| H      | 4.741859  | -1.976432 | 0.388294  |
| H      | 2.872034  | -3.559399 | -0.009841 |
| H      | 0.729759  | -4.091133 | -0.297835 |
| H      | -1.708670 | -3.551901 | -0.263712 |
| H      | -3.955562 | -2.393776 | -1.310048 |
| H      | -3.498725 | -0.874825 | -2.112985 |
| H      | -4.884561 | -0.916844 | -0.991484 |
| C      | -3.455384 | -1.526892 | 1.519450  |
| H      | -3.548728 | -2.626702 | 1.505904  |
| H      | -4.463658 | -1.125510 | 1.729510  |
| H      | -2.806665 | -1.264604 | 2.373605  |
| C      | -3.587653 | 1.448663  | 0.342637  |
| C      | -3.383726 | 2.813412  | 0.230481  |
| C      | -2.107176 | 3.221648  | -0.151430 |
| C      | -1.297546 | 0.910277  | -0.119078 |
| C      | -1.088296 | 2.288695  | -0.333635 |
| H      | -4.565470 | 1.019979  | 0.567472  |
| H      | -0.157191 | 2.693823  | -0.689951 |
| H      | 3.020703  | 3.615233  | -0.291234 |
| H      | -4.200255 | 3.516303  | 0.394315  |
| H      | -1.890617 | 4.277749  | -0.325065 |
| C      | -1.360487 | -1.420597 | -0.150410 |
| N      | -2.600132 | 0.567576  | 0.154295  |

---

**(M)-Azabora[6]helicene H2***E* = -1043.774204 Hartree

| Symbol | X         | Y         | Z         |
|--------|-----------|-----------|-----------|
| C      | 0.338141  | -1.035095 | -0.060501 |
| C      | 1.211174  | 0.148223  | 0.013913  |
| N      | 2.456085  | -0.215973 | 0.382414  |
| B      | 2.664395  | -1.817073 | 0.332293  |
| C      | 1.158277  | -2.182905 | -0.085093 |
| C      | 0.595102  | -3.424799 | -0.434745 |
| C      | -0.741999 | -3.501732 | -0.780448 |
| C      | -1.606100 | -2.387751 | -0.612235 |
| C      | -1.090101 | -1.147759 | -0.121782 |
| C      | 0.977503  | 1.508410  | -0.384982 |
| C      | 2.002992  | 2.473356  | -0.114100 |
| C      | 3.237638  | 2.028357  | 0.436873  |
| C      | 3.442283  | 0.686047  | 0.613191  |
| C      | -3.007712 | -2.510543 | -0.900650 |
| C      | -3.877889 | -1.494943 | -0.636036 |
| C      | -3.432765 | -0.320401 | 0.057290  |
| C      | -2.046045 | -0.169372 | 0.374267  |
| C      | -0.175736 | 1.924447  | -1.101317 |
| C      | -0.341796 | 3.245773  | -1.461617 |
| C      | 0.630916  | 4.213106  | -1.113487 |
| C      | 1.785481  | 3.833046  | -0.461153 |
| C      | -4.360403 | 0.655021  | 0.501517  |
| C      | -3.958033 | 1.712892  | 1.296608  |
| C      | -2.609035 | 1.808982  | 1.696082  |
| C      | -1.680109 | 0.887685  | 1.245047  |
| C      | 3.054576  | -2.384893 | 1.808180  |
| C      | 3.789405  | -2.137199 | -0.801711 |
| H      | 1.225456  | -4.317562 | -0.476861 |
| H      | -1.171516 | -4.439538 | -1.143444 |
| H      | 4.033020  | 2.742178  | 0.654380  |
| H      | 4.396859  | 0.271901  | 0.939522  |
| H      | -3.361950 | -3.444821 | -1.343383 |
| H      | -4.938438 | -1.588076 | -0.881723 |
| H      | -0.922644 | 1.189185  | -1.388989 |
| H      | -1.229322 | 3.546764  | -2.021807 |
| H      | 0.476543  | 5.259096  | -1.387708 |
| H      | 2.561242  | 4.565403  | -0.227489 |
| H      | -5.412075 | 0.537698  | 0.227847  |
| H      | -4.685770 | 2.451140  | 1.641278  |
| H      | -2.294403 | 2.608645  | 2.370355  |
| H      | -0.650551 | 0.965500  | 1.589534  |
| H      | 2.316448  | -2.111595 | 2.582290  |
| H      | 3.116317  | -3.486976 | 1.789390  |
| H      | 4.041552  | -2.014711 | 2.140767  |
| H      | 3.862073  | -3.229018 | -0.950981 |



---

|   |          |           |           |
|---|----------|-----------|-----------|
| H | 3.552727 | -1.688437 | -1.782328 |
| H | 4.795297 | -1.787318 | -0.507690 |

**TS-Azabora[6]helicene H2**

E = -1043.727547 Hartree

| Symbol | X         | Y         | Z         |
|--------|-----------|-----------|-----------|
| C      | -0.297442 | -0.984148 | 0.462831  |
| C      | 1.131460  | -1.175250 | 0.255898  |
| C      | 1.553925  | -2.519125 | -0.022365 |
| C      | 0.712143  | -3.621568 | 0.260054  |
| C      | -0.602267 | -3.423245 | 0.619132  |
| C      | 2.201466  | -0.180535 | 0.195078  |
| C      | 3.376303  | -0.435734 | -0.587761 |
| C      | 3.628169  | -1.761115 | -1.068898 |
| C      | 2.804044  | -2.773974 | -0.686008 |
| C      | 4.255302  | 1.775202  | -0.045460 |
| C      | 3.211638  | 1.944558  | 0.882795  |
| B      | -2.668804 | -1.797474 | 0.264545  |
| C      | -3.627488 | -1.673437 | 1.582256  |
| C      | 2.225106  | 0.977679  | 0.995968  |
| C      | 4.348652  | 0.582001  | -0.742549 |
| H      | 5.021432  | 2.545109  | -0.162698 |
| H      | 5.210998  | 0.383260  | -1.384120 |
| H      | 4.532480  | -1.953053 | -1.650988 |
| H      | 3.041047  | -3.810891 | -0.936410 |
| H      | 1.108152  | -4.630086 | 0.112957  |
| H      | -1.265434 | -4.277223 | 0.780358  |
| H      | -3.762425 | -2.668000 | 2.042202  |
| H      | -3.209705 | -1.005274 | 2.355282  |
| H      | -4.633156 | -1.297847 | 1.320725  |
| C      | -3.307734 | -2.731355 | -0.901697 |
| H      | -3.380461 | -3.775346 | -0.550206 |
| H      | -4.333563 | -2.424990 | -1.175820 |
| H      | -2.703579 | -2.742442 | -1.826024 |
| C      | -3.290282 | 0.404398  | -0.989444 |
| C      | -3.021122 | 1.687562  | -1.379810 |
| C      | -1.924371 | 2.352738  | -0.770400 |
| C      | -1.203732 | 0.177661  | 0.152027  |
| C      | -1.080593 | 1.619826  | 0.138201  |
| H      | -4.195261 | -0.129727 | -1.278105 |
| H      | 3.186375  | 2.822765  | 1.531977  |
| H      | -3.692486 | 2.222070  | -2.052585 |
| C      | -1.744211 | 3.754212  | -0.918901 |
| H      | -2.348102 | 4.281295  | -1.660807 |
| C      | -0.338964 | 2.387658  | 1.071664  |
| C      | -0.890603 | 4.444880  | -0.084832 |
| H      | -0.775357 | 5.526137  | -0.187457 |
| C      | -0.241422 | 3.760569  | 0.967614  |

---

|   |           |           |           |
|---|-----------|-----------|-----------|
| H | 0.320133  | 4.320028  | 1.718430  |
| H | 0.069793  | 1.896734  | 1.944791  |
| H | 1.496125  | 1.052463  | 1.788513  |
| C | -1.134189 | -2.125047 | 0.568092  |
| N | -2.400818 | -0.304869 | -0.253380 |

**(P)-Carbo[4]helicene**

*E* = -692.758602 Hartree

| Symbol | X         | Y         | Z         |
|--------|-----------|-----------|-----------|
| C      | 0.000000  | 0.398019  | 0.000000  |
| C      | 0.000000  | 1.818310  | 0.000000  |
| C      | -1.219651 | 2.544739  | -0.184515 |
| C      | -2.411212 | 1.897299  | -0.332509 |
| C      | -2.485656 | 0.477799  | -0.178475 |
| C      | -1.288239 | -0.278983 | 0.056025  |
| C      | 1.288239  | -0.278983 | -0.056025 |
| C      | 2.485656  | 0.477799  | 0.178475  |
| C      | 2.411212  | 1.897299  | 0.332509  |
| C      | 1.219651  | 2.544739  | 0.184515  |
| C      | 1.455825  | -1.642561 | -0.425342 |
| C      | 2.700686  | -2.247364 | -0.445857 |
| C      | 3.858218  | -1.518763 | -0.102625 |
| C      | 3.746105  | -0.172575 | 0.184751  |
| C      | -3.746105 | -0.172575 | -0.184751 |
| C      | -3.858218 | -1.518763 | 0.102625  |
| C      | -2.700686 | -2.247364 | 0.445857  |
| C      | -1.455825 | -1.642561 | 0.425342  |
| H      | -1.169657 | 3.635440  | -0.225984 |
| H      | -3.333142 | 2.454840  | -0.514145 |
| H      | 3.333142  | 2.454840  | 0.514145  |
| H      | 1.169657  | 3.635440  | 0.225984  |
| H      | 4.835971  | -2.005775 | -0.103398 |
| H      | 4.637035  | 0.424919  | 0.394176  |
| H      | -4.637035 | 0.424919  | -0.394176 |
| H      | -4.835971 | -2.005775 | 0.103398  |
| H      | -0.596530 | -2.222154 | 0.751712  |
| H      | -2.784640 | -3.293805 | 0.748287  |
| H      | 2.784640  | -3.293805 | -0.748287 |
| H      | 0.596530  | -2.222154 | -0.751712 |

**TS-Carbo[4]helicene**

*E* = -692.752548 Hartree

| Symbol | X         | Y        | Z        |
|--------|-----------|----------|----------|
| C      | 0.000000  | 0.339555 | 0.000066 |
| C      | 0.000004  | 1.767793 | 0.000024 |
| C      | -1.210682 | 2.528911 | 0.000170 |
| C      | -2.425514 | 1.922128 | 0.000212 |
| C      | -2.511677 | 0.499005 | 0.000078 |

---

|   |           |           |           |
|---|-----------|-----------|-----------|
| C | -1.320316 | -0.316056 | 0.000100  |
| C | 1.320317  | -0.316057 | 0.000018  |
| C | 2.511679  | 0.499002  | -0.000079 |
| C | 2.425523  | 1.922123  | -0.000207 |
| C | 1.210692  | 2.528907  | -0.000165 |
| C | 1.567138  | -1.719930 | 0.000116  |
| C | 2.838182  | -2.269302 | 0.000104  |
| C | 3.981928  | -1.451675 | 0.000019  |
| C | 3.804674  | -0.084997 | -0.000063 |
| C | -3.804673 | -0.084988 | -0.000094 |
| C | -3.981937 | -1.451664 | -0.000235 |
| C | -2.838197 | -2.269300 | -0.000116 |
| C | -1.567137 | -1.719935 | 0.000074  |
| H | -1.130802 | 3.618123  | 0.000258  |
| H | -3.348832 | 2.505774  | 0.000341  |
| H | 3.348842  | 2.505768  | -0.000302 |
| H | 1.130817  | 3.618120  | -0.000277 |
| H | 4.982639  | -1.889009 | 0.000049  |
| H | 4.667409  | 0.585659  | -0.000111 |
| H | -4.667405 | 0.585671  | -0.000110 |
| H | -4.982652 | -1.888990 | -0.000425 |
| H | -0.760805 | -2.434276 | 0.000223  |
| H | -2.942143 | -3.356845 | -0.000187 |
| H | 2.942117  | -3.356847 | 0.000160  |
| H | 0.760807  | -2.434270 | 0.000255  |

**Cartesian coordinates (M06-2X/def2-SVP) of the  $S_0$  geometries**

**EH2**

*PMM (C1)*

$E = -1503.594686$  Hartree

| Symbol | X         | Y         | Z         |
|--------|-----------|-----------|-----------|
| C      | 0.763160  | 3.185576  | -0.480594 |
| C      | -0.497388 | 2.625450  | -0.401183 |
| C      | -0.694944 | 1.303841  | 0.075856  |
| C      | 0.447004  | 0.501296  | 0.334419  |
| C      | -2.128427 | -0.682535 | 0.234993  |
| C      | -1.033915 | -1.401179 | 0.881339  |
| C      | 0.226125  | -0.767980 | 1.012935  |
| C      | -1.248135 | -2.616465 | 1.575053  |
| C      | -0.260444 | -3.178317 | 2.362629  |
| C      | 0.973863  | -2.528812 | 2.515160  |
| C      | 1.201390  | -1.335156 | 1.858695  |
| C      | 1.727045  | 1.033009  | 0.007611  |
| C      | 3.042535  | 0.371752  | -0.126985 |
| N      | 4.017931  | 1.284520  | -0.108259 |
| B      | 3.460391  | 2.800156  | -0.256673 |
| C      | 1.903357  | 2.399743  | -0.259775 |
| C      | 3.382491  | -0.996932 | -0.410140 |

---

|   |           |           |           |
|---|-----------|-----------|-----------|
| C | 4.759692  | -1.359456 | -0.382836 |
| C | 5.738442  | -0.344030 | -0.187369 |
| C | 5.332480  | 0.956360  | -0.117466 |
| C | 2.427801  | -1.971313 | -0.804144 |
| C | 2.816550  | -3.263001 | -1.067865 |
| C | 4.173502  | -3.643633 | -0.944839 |
| C | 5.127429  | -2.709570 | -0.621399 |
| C | 4.027595  | 3.388508  | -1.661222 |
| C | 3.874602  | 3.679316  | 1.044532  |
| C | -2.027191 | 0.701493  | 0.156336  |
| C | -4.404282 | -3.284132 | -1.282004 |
| C | -3.307489 | -2.695273 | -0.682075 |
| C | -3.324891 | -1.337786 | -0.283089 |
| C | -4.483139 | -0.569413 | -0.557453 |
| C | -5.589748 | -1.191976 | -1.170391 |
| C | -5.562453 | -2.529397 | -1.517525 |
| C | -3.269252 | 1.476262  | 0.149623  |
| C | -4.492065 | 0.843031  | -0.188999 |
| C | -3.319242 | 2.803453  | 0.639233  |
| C | -4.507973 | 3.504746  | 0.709048  |
| C | -5.703777 | 2.898255  | 0.300148  |
| C | -5.690654 | 1.583037  | -0.122764 |
| H | 0.872805  | 4.232103  | -0.774934 |
| H | -1.357037 | 3.212044  | -0.718172 |
| H | -2.231755 | -3.082733 | 1.545899  |
| H | -0.463609 | -4.103154 | 2.904383  |
| H | 1.738059  | -2.945174 | 3.172520  |
| H | 2.138858  | -0.801618 | 2.017726  |
| H | 6.797877  | -0.597769 | -0.164427 |
| H | 6.024621  | 1.797909  | -0.066688 |
| H | 4.464852  | -4.677043 | -1.138402 |
| H | 6.182902  | -2.982312 | -0.571218 |
| H | 3.562384  | 4.368160  | -1.858881 |
| H | 5.117643  | 3.557478  | -1.636921 |
| H | 3.803691  | 2.739809  | -2.523449 |
| H | 3.422466  | 4.682036  | 0.978463  |
| H | 3.537641  | 3.229594  | 1.992262  |
| H | 4.966232  | 3.828761  | 1.108414  |
| H | -4.356296 | -4.328380 | -1.593738 |
| H | -2.393925 | -3.275288 | -0.560645 |
| H | -2.411978 | 3.265438  | 1.023349  |
| H | -4.514187 | 4.520175  | 1.107400  |
| H | -6.645868 | 3.445315  | 0.353599  |
| H | -6.635030 | 1.100759  | -0.371779 |
| H | -6.428253 | -2.985645 | -1.999094 |
| H | -6.476798 | -0.604775 | -1.404744 |
| H | 2.073396  | -3.997403 | -1.379869 |

---

|   |          |           |           |
|---|----------|-----------|-----------|
| H | 1.385932 | -1.683339 | -0.924843 |
|---|----------|-----------|-----------|

**EH3***PMM (C1)**E = -1657.065853 Hartree*

| Symbol | X         | Y         | Z         |
|--------|-----------|-----------|-----------|
| C      | 0.467032  | 3.508988  | -0.628922 |
| C      | -0.762718 | 2.901331  | -0.456345 |
| C      | -0.880926 | 1.613500  | 0.129898  |
| C      | 0.307937  | 0.900500  | 0.427244  |
| C      | -2.172260 | -0.451037 | 0.434824  |
| C      | -1.032357 | -1.050375 | 1.120394  |
| C      | 0.184546  | -0.331739 | 1.188945  |
| C      | -1.155250 | -2.236081 | 1.881573  |
| C      | -0.114022 | -2.694821 | 2.666855  |
| C      | 1.079427  | -1.961834 | 2.754228  |
| C      | 1.212480  | -0.788220 | 2.037901  |
| C      | 1.544752  | 1.452520  | -0.004208 |
| C      | 2.879470  | 0.824023  | -0.115584 |
| N      | 3.818074  | 1.787354  | -0.151399 |
| B      | 3.191834  | 3.255208  | -0.471164 |
| C      | 1.652256  | 2.795293  | -0.392605 |
| C      | 3.288492  | -0.541682 | -0.243281 |
| C      | 4.648361  | -0.821084 | 0.048337  |
| C      | 5.572180  | 0.244191  | 0.170153  |
| C      | 5.130652  | 1.526893  | -0.028044 |
| C      | 2.432470  | -1.634715 | -0.682238 |
| C      | 2.886628  | -2.968403 | -0.505102 |
| C      | 4.213696  | -3.208811 | -0.008289 |
| C      | 5.078636  | -2.184663 | 0.199634  |
| C      | 1.212861  | -1.435515 | -1.368228 |
| C      | 0.435600  | -2.505189 | -1.766649 |
| C      | 0.843962  | -3.824355 | -1.497267 |
| C      | 2.061375  | -4.048652 | -0.889230 |
| C      | 3.716202  | 3.681292  | -1.948966 |
| C      | 3.591152  | 4.303224  | 0.701867  |
| C      | -2.169017 | 0.928990  | 0.261935  |
| C      | -4.237023 | -3.302478 | -0.923743 |
| C      | -3.191640 | -2.598351 | -0.356737 |
| C      | -3.313552 | -1.222911 | -0.044840 |
| C      | -4.522016 | -0.560362 | -0.372914 |
| C      | -5.574643 | -1.300560 | -0.949318 |
| C      | -5.445650 | -2.651515 | -1.211078 |
| C      | -3.462117 | 1.610216  | 0.196451  |
| C      | -4.634701 | 0.869305  | -0.099669 |
| C      | -3.607475 | 2.962946  | 0.586142  |
| C      | -4.843195 | 3.581466  | 0.603953  |
| C      | -5.991008 | 2.863245  | 0.240569  |

---

|   |           |           |           |
|---|-----------|-----------|-----------|
| C | -5.882867 | 1.525391  | -0.087332 |
| H | 0.514981  | 4.531794  | -1.010322 |
| H | -1.658646 | 3.420809  | -0.789863 |
| H | -2.106932 | -2.765001 | 1.900299  |
| H | -0.243225 | -3.602793 | 3.257622  |
| H | 1.884118  | -2.295798 | 3.410569  |
| H | 2.113563  | -0.185422 | 2.151504  |
| H | 6.625614  | 0.039614  | 0.358434  |
| H | 5.792490  | 2.393561  | -0.063203 |
| H | 4.534402  | -4.242942 | 0.133173  |
| H | 6.112817  | -2.371530 | 0.492850  |
| H | 0.886210  | -0.424406 | -1.605892 |
| H | -0.501715 | -2.319739 | -2.294267 |
| H | 0.216323  | -4.664164 | -1.798914 |
| H | 2.419230  | -5.066230 | -0.720679 |
| H | 3.223792  | 4.619065  | -2.254402 |
| H | 4.802487  | 3.874106  | -1.967693 |
| H | 3.492408  | 2.926981  | -2.720539 |
| H | 3.089691  | 5.268786  | 0.526536  |
| H | 3.295082  | 3.958903  | 1.705823  |
| H | 4.674981  | 4.511343  | 0.719538  |
| H | -4.110911 | -4.358322 | -1.167490 |
| H | -2.238042 | -3.099195 | -0.192220 |
| H | -2.736192 | 3.514050  | 0.934767  |
| H | -4.923605 | 4.620475  | 0.926171  |
| H | -6.969700 | 3.344539  | 0.254306  |
| H | -6.789277 | 0.960822  | -0.302536 |
| H | -6.271416 | -3.200021 | -1.665979 |
| H | -6.500605 | -0.796574 | -1.223853 |

**Cartesian coordinates (M06-2X/def2-SVP) of the S<sub>1</sub> geometries  
EH2**

*PMM (C1)*

*E* = -1503.481514 Hartree

| Symbol | X         | Y         | Z         |
|--------|-----------|-----------|-----------|
| C      | 0.723279  | 3.184753  | -0.538508 |
| C      | -0.543401 | 2.623562  | -0.446200 |
| C      | -0.715519 | 1.301963  | 0.045410  |
| C      | 0.446076  | 0.482856  | 0.308303  |
| C      | -2.114620 | -0.698910 | 0.272313  |
| C      | -1.042215 | -1.395751 | 0.944485  |
| C      | 0.232688  | -0.764788 | 1.024933  |
| C      | -1.268904 | -2.597559 | 1.654293  |
| C      | -0.265405 | -3.175059 | 2.414661  |
| C      | 0.986463  | -2.551772 | 2.494550  |
| C      | 1.228236  | -1.365572 | 1.814608  |
| C      | 1.714383  | 0.998606  | -0.053085 |
| C      | 3.016009  | 0.369300  | -0.183902 |

---

|   |           |           |           |
|---|-----------|-----------|-----------|
| N | 3.994214  | 1.337039  | -0.176111 |
| B | 3.408984  | 2.835345  | -0.216040 |
| C | 1.857807  | 2.412718  | -0.287784 |
| C | 3.377132  | -0.993780 | -0.460247 |
| C | 4.770262  | -1.335150 | -0.428348 |
| C | 5.725344  | -0.288382 | -0.247046 |
| C | 5.292320  | 1.016257  | -0.186908 |
| C | 2.449176  | -2.002189 | -0.803594 |
| C | 2.860773  | -3.312529 | -1.012825 |
| C | 4.213755  | -3.658795 | -0.897116 |
| C | 5.156132  | -2.677968 | -0.623585 |
| C | 3.944273  | 3.617740  | -1.537563 |
| C | 3.755146  | 3.605441  | 1.177871  |
| C | -2.015446 | 0.715090  | 0.159556  |
| C | -4.315562 | -3.307250 | -1.310715 |
| C | -3.239566 | -2.711694 | -0.678695 |
| C | -3.282803 | -1.352391 | -0.283641 |
| C | -4.442062 | -0.588615 | -0.585859 |
| C | -5.520219 | -1.215855 | -1.228975 |
| C | -5.467800 | -2.557200 | -1.578767 |
| C | -3.269102 | 1.468174  | 0.168039  |
| C | -4.478230 | 0.822339  | -0.193601 |
| C | -3.331441 | 2.785172  | 0.674884  |
| C | -4.531632 | 3.473731  | 0.738915  |
| C | -5.712151 | 2.856436  | 0.312886  |
| C | -5.682571 | 1.542290  | -0.128845 |
| H | 0.837424  | 4.227415  | -0.843690 |
| H | -1.411502 | 3.191181  | -0.774535 |
| H | -2.265149 | -3.038978 | 1.653976  |
| H | -0.461745 | -4.092095 | 2.970676  |
| H | 1.777147  | -2.989570 | 3.105337  |
| H | 2.196916  | -0.876550 | 1.908734  |
| H | 6.790409  | -0.515853 | -0.227991 |
| H | 5.987197  | 1.857869  | -0.144227 |
| H | 4.528909  | -4.692280 | -1.047759 |
| H | 6.217650  | -2.927582 | -0.575108 |
| H | 3.449802  | 4.599059  | -1.631312 |
| H | 5.027945  | 3.817943  | -1.474787 |
| H | 3.758921  | 3.061042  | -2.470132 |
| H | 3.279762  | 4.599591  | 1.202907  |
| H | 3.415144  | 3.050945  | 2.067696  |
| H | 4.842633  | 3.766083  | 1.278572  |
| H | -4.253287 | -4.350110 | -1.622863 |
| H | -2.322301 | -3.279524 | -0.529963 |
| H | -2.427858 | 3.246130  | 1.069916  |
| H | -4.554692 | 4.484731  | 1.146787  |
| H | -6.661680 | 3.390469  | 0.364663  |

---

|   |           |           |           |
|---|-----------|-----------|-----------|
| H | -6.619639 | 1.054362  | -0.394323 |
| H | -6.315595 | -3.017684 | -2.087456 |
| H | -6.407825 | -0.638609 | -1.484933 |
| H | 2.122975  | -4.072342 | -1.274470 |
| H | 1.400393  | -1.742952 | -0.932129 |

**EH3**

*PMM (C1)*

*E* = -1656.953192 Hartree

| Symbol | X         | Y         | Z         |
|--------|-----------|-----------|-----------|
| C      | 0.547336  | 3.548673  | -0.556056 |
| C      | -0.699844 | 2.951866  | -0.371700 |
| C      | -0.821801 | 1.651217  | 0.189006  |
| C      | 0.369259  | 0.899933  | 0.469174  |
| C      | -2.093267 | -0.424402 | 0.496898  |
| C      | -0.989054 | -1.023673 | 1.209546  |
| C      | 0.249664  | -0.320696 | 1.242199  |
| C      | -1.128741 | -2.216391 | 1.954954  |
| C      | -0.072166 | -2.718319 | 2.697421  |
| C      | 1.144271  | -2.023870 | 2.730453  |
| C      | 1.297493  | -0.838724 | 2.023631  |
| C      | 1.593295  | 1.422394  | -0.015003 |
| C      | 2.865217  | 0.774605  | -0.209318 |
| N      | 3.866792  | 1.720467  | -0.259044 |
| B      | 3.274775  | 3.214308  | -0.492646 |
| C      | 1.715620  | 2.814741  | -0.354256 |
| C      | 3.202177  | -0.615084 | -0.327002 |
| C      | 4.531364  | -0.977403 | 0.020793  |
| C      | 5.501831  | 0.048129  | 0.150341  |
| C      | 5.135022  | 1.367991  | -0.086237 |
| C      | 2.287228  | -1.629449 | -0.765460 |
| C      | 2.601587  | -2.998468 | -0.513239 |
| C      | 3.886907  | -3.328199 | 0.020987  |
| C      | 4.835776  | -2.364926 | 0.217841  |
| C      | 1.101502  | -1.331438 | -1.494117 |
| C      | 0.219247  | -2.326732 | -1.843723 |
| C      | 0.474042  | -3.669996 | -1.477205 |
| C      | 1.655680  | -3.996086 | -0.843949 |
| C      | 3.674821  | 3.714257  | -1.988164 |
| C      | 3.777913  | 4.209936  | 0.689273  |
| C      | -2.086609 | 0.987801  | 0.318474  |
| C      | -4.093510 | -3.243378 | -0.988839 |
| C      | -3.072161 | -2.550917 | -0.363428 |
| C      | -3.209477 | -1.178478 | -0.042088 |
| C      | -4.407405 | -0.507356 | -0.404966 |
| C      | -5.428785 | -1.232925 | -1.038094 |
| C      | -5.283760 | -2.583449 | -1.319794 |
| C      | -3.384542 | 1.655709  | 0.267916  |



|   |           |           |           |
|---|-----------|-----------|-----------|
| C | -4.541872 | 0.916132  | -0.085216 |
| C | -3.539914 | 2.990899  | 0.702660  |
| C | -4.781116 | 3.605167  | 0.705136  |
| C | -5.910712 | 2.892285  | 0.289346  |
| C | -5.789591 | 1.561677  | -0.081680 |
| H | 0.605669  | 4.578384  | -0.915662 |
| H | -1.594527 | 3.480973  | -0.694445 |
| H | -2.096514 | -2.715848 | 1.989344  |
| H | -0.199724 | -3.633522 | 3.276125  |
| H | 1.974275  | -2.403058 | 3.328656  |
| H | 2.236564  | -0.289952 | 2.084820  |
| H | 6.540353  | -0.200702 | 0.364516  |
| H | 5.866611  | 2.178741  | -0.111904 |
| H | 4.116832  | -4.377728 | 0.216507  |
| H | 5.839793  | -2.632622 | 0.551928  |
| H | 0.909917  | -0.302750 | -1.798873 |
| H | -0.679233 | -2.080069 | -2.413115 |
| H | -0.239894 | -4.451905 | -1.742554 |
| H | 1.891382  | -5.037487 | -0.613970 |
| H | 3.193931  | 4.680898  | -2.212135 |
| H | 4.763782  | 3.869282  | -2.077312 |
| H | 3.371472  | 3.002133  | -2.772332 |
| H | 3.296486  | 5.196386  | 0.590098  |
| H | 3.548483  | 3.829718  | 1.697853  |
| H | 4.866759  | 4.381735  | 0.632995  |
| H | -3.959241 | -4.295271 | -1.243676 |
| H | -2.124328 | -3.049731 | -0.164125 |
| H | -2.676028 | 3.525935  | 1.093473  |
| H | -4.877134 | 4.632449  | 1.058068  |
| H | -6.892710 | 3.366874  | 0.294302  |
| H | -6.688250 | 1.002502  | -0.339536 |
| H | -6.088734 | -3.121901 | -1.821502 |
| H | -6.344945 | -0.726590 | -1.340067 |

## 10. References

- [S1] J. R. Lakowicz, *Principle of Fluorescence spectroscopy*, 2nd ed., Kluwer Academic/Plenum, New York, **1999**.
- [S2] I. B. Berlman, in *Handbook of Fluorescence Spectra of Aromatic Molecules*, 2nd ed., Academic Press, New York, **1971**, p. 399.
- [S3] A. J. Fry, 2nd ed., Marcel Dekker Ltd., New York, **1996**, p. 481.
- [S4] J. Full, S. P. Panchal, J. Götz, A.-M. Krause, A. Nowak-Król, *Angew. Chem. Int. Ed.* **2021**, *60*, 4350-4357.
- [S5] T. Tsuda, Y. Kawakami, S.-M. Choi, R. Shintani, *Angew. Chem. Int. Ed.* **2020**, *59*, 8057-8061.
- [S6] K. Pati, C. Michas, D. Allenger, I. Piskun, P. S. Coutros, G. d. P. Gomes, I. V. Alabugin, *J. Org. Chem.* **2015**, *80*, 11706-11717.
- [S7] G. Sheldrick, *Acta Crystallogr. A* **2015**, *71*, 3-8.
- [S8] G. Sheldrick, *Acta Crystallogr. A* **2008**, *64*, 112-122.
- [S9] Gaussian 16, Revision A.03, M. J. Frisch, G. W. Trucks, H. B. Schlegel, G. E. Scuseria, M. A. Robb, J. R. Cheeseman, G. Scalmani, V. Barone, G. A. Petersson, H. Nakatsuji, M. C. X. Li, A. V. Marenich, J. Bloino, B. G. Janesko, R. Gomperts, B. Mennucci, H. P. Hratchian, J. V. Ortiz, A. F. Izmaylov, J. L. Sonnenberg, D. Williams-Young, F. Ding, F. Lipparini, F. Egidi, J. Goings, B. Peng, A. Petrone, T. Henderson, D. Ranasinghe, V. G. Zakrzewski, N. R. J. Gao, G. Zheng, W. Liang, M. Hada, M. Ehara, K. Toyota, R. Fukuda, J. Hasegawa, M. Ishida, T. Nakajima, Y. Honda, O. Kitao, H. Nakai, T. Vreven, K. Throssell, J. A. Montgomery, J. E. P. Jr., F. Ogliaro, M. J. Bearpark, J. J. Heyd, E. N. Brothers, K. N. Kudin, V. N. Staroverov, T. A. Keith, R. Kobayashi, J. Normand, K. Raghavachari, A. P. Rendell, J. C. Burant, S. S. Iyengar, J. Tomasi, M. Cossi, J. M. Millam, M. Klene, C. Adamo, R. Cammi, J. W. Ochterski, R. L. Martin, K. Morokuma, O. Farkas, J. B. Foresman and D. J. Fox, Gaussian, Inc., Wallingford CT, **2016**.
- [S10] a) A. D. Becke, *Phys. Rev. A* **1988**, *38*, 3098-3100; b) C. Lee, W. Yang, R. G. Parr, *Phys. Rev. B* **1988**, *37*, 785-789; c) A. D. Becke, *J. Chem. Phys.* **1993**, *98*, 5648-5652.
- [S11] a) A. Schäfer, C. Huber, R. Ahlrichs, *J. Chem. Phys.* **1994**, *100*, 5829-5835; b) F. Weigend, R. Ahlrichs, *Phys. Chem. Chem. Phys.* **2005**, *7*, 3297-3305; c) F. Weigend, *Phys. Chem. Chem. Phys.* **2006**, *8*, 1057-1065.
- [S12] S. Grimme, S. Ehrlich, L. Goerigk, *J. Comput. Chem.* **2011**, *32*, 1456-1465.
- [S13] T. Yanai, D. P. Tew, N. C. Handy, *Chem. Phys. Lett.* **2004**, *393*, 51-57.

- 
- [S14] GaussView; Version 5, R. Dennington, T. Keith, J. Millam, Semichem Inc., Shawnee Mission KS, **2009**.
- [S15] H. Kubo, T. Hirose, T. Nakashima, T. Kawai, J.-y. Hasegawa, K. Matsuda, *J. Phys. Chem. Lett.* **2021**, *12*, 686-695.
- [S16] Y. Zhao, D. G. Truhlar, *Theor. Chem. Acc.* **2008**, *120*, 215-241.
- [S17] W. Humphrey, A. Dalke, K. Schulten, *J. Molec. Graphics* **1996**, *14*, 33-38.
